# Supplementary material
Source: ML conference proceedings conference paper supplement (https://openaccess.thecvf.com/content/CVPR2022/html/Luo_How_Much_Does_CVPR_2022_paper.html)
Supplement: Supplementary file 1 [file Luo_How_Much_Does_CVPR_2022_supplemental.pdf]

# Supplementary material

## **How much does input data type impact final face model accuracy?**

Jiahao Luo<sup>1</sup>, Fahim Hasan Khan<sup>1</sup>, Issei Mori<sup>2</sup>, Akila de Silva<sup>1</sup>,  
Eric Sandoval Ruezga<sup>1</sup>, Minghao Liu<sup>1</sup>, Alex Pang<sup>1</sup>, James Davis<sup>1</sup>

<sup>1</sup>University of California, Santa Cruz, <sup>2</sup>University of California, San Deigo  
[jluo53,davisje]@ucsc.edu

### Part 1: Additional faces - figure 1

- Additional faces are provided as evidence that the trends shown in figure 1 are similar on all faces in our dataset.
- The reconstructed 3D mesh files are available for download as PLY.

### Part 2: Additional data types - figure 2

- Additional data types and combinations of data types are shown as CDF curves.

### Part 3 : Additional noise distributions - figure 3

- The effect of noise is verified at several magnitudes.

# Part 1

## More face examples like figure 1

The reconstructed ply files for these examples can be found in a 106MB zip file located at:  
<https://drive.google.com/file/d/1T5anJqTn35UpAClHO2mAQfJYbQHDLBdS/view?usp=sharing>

The specific faces shown match the “publishable” set as required by the FaceScape license.



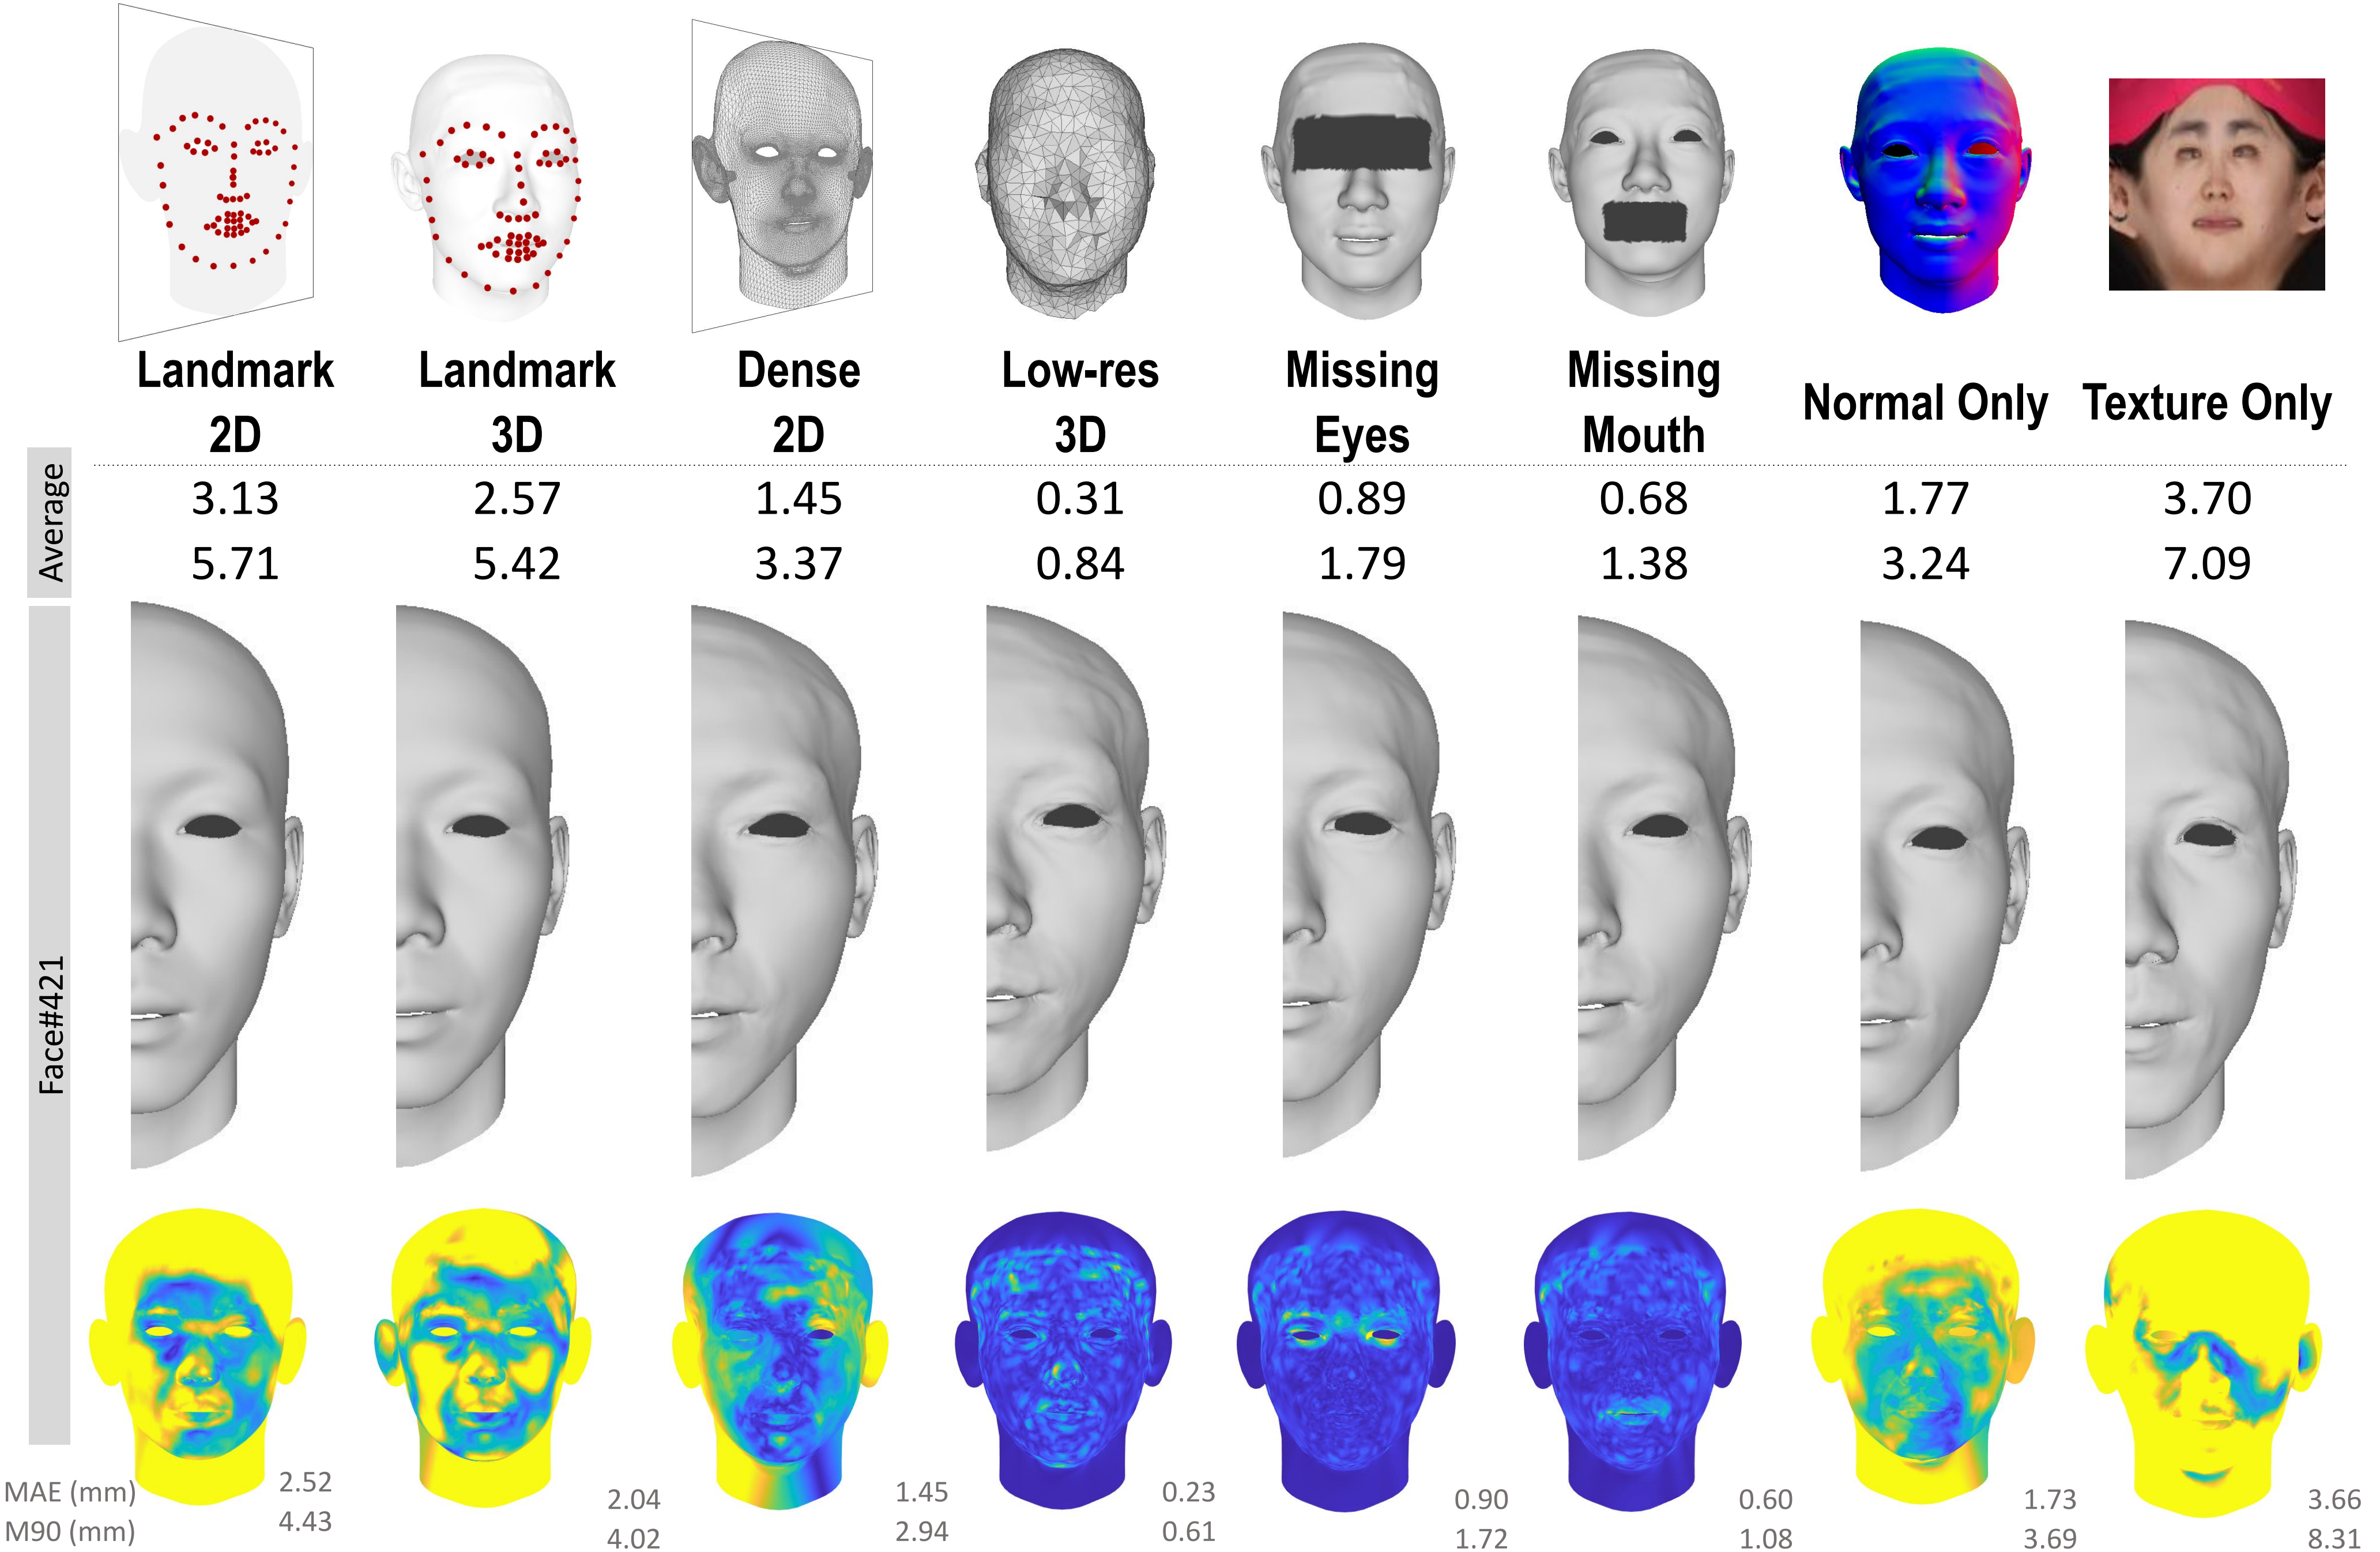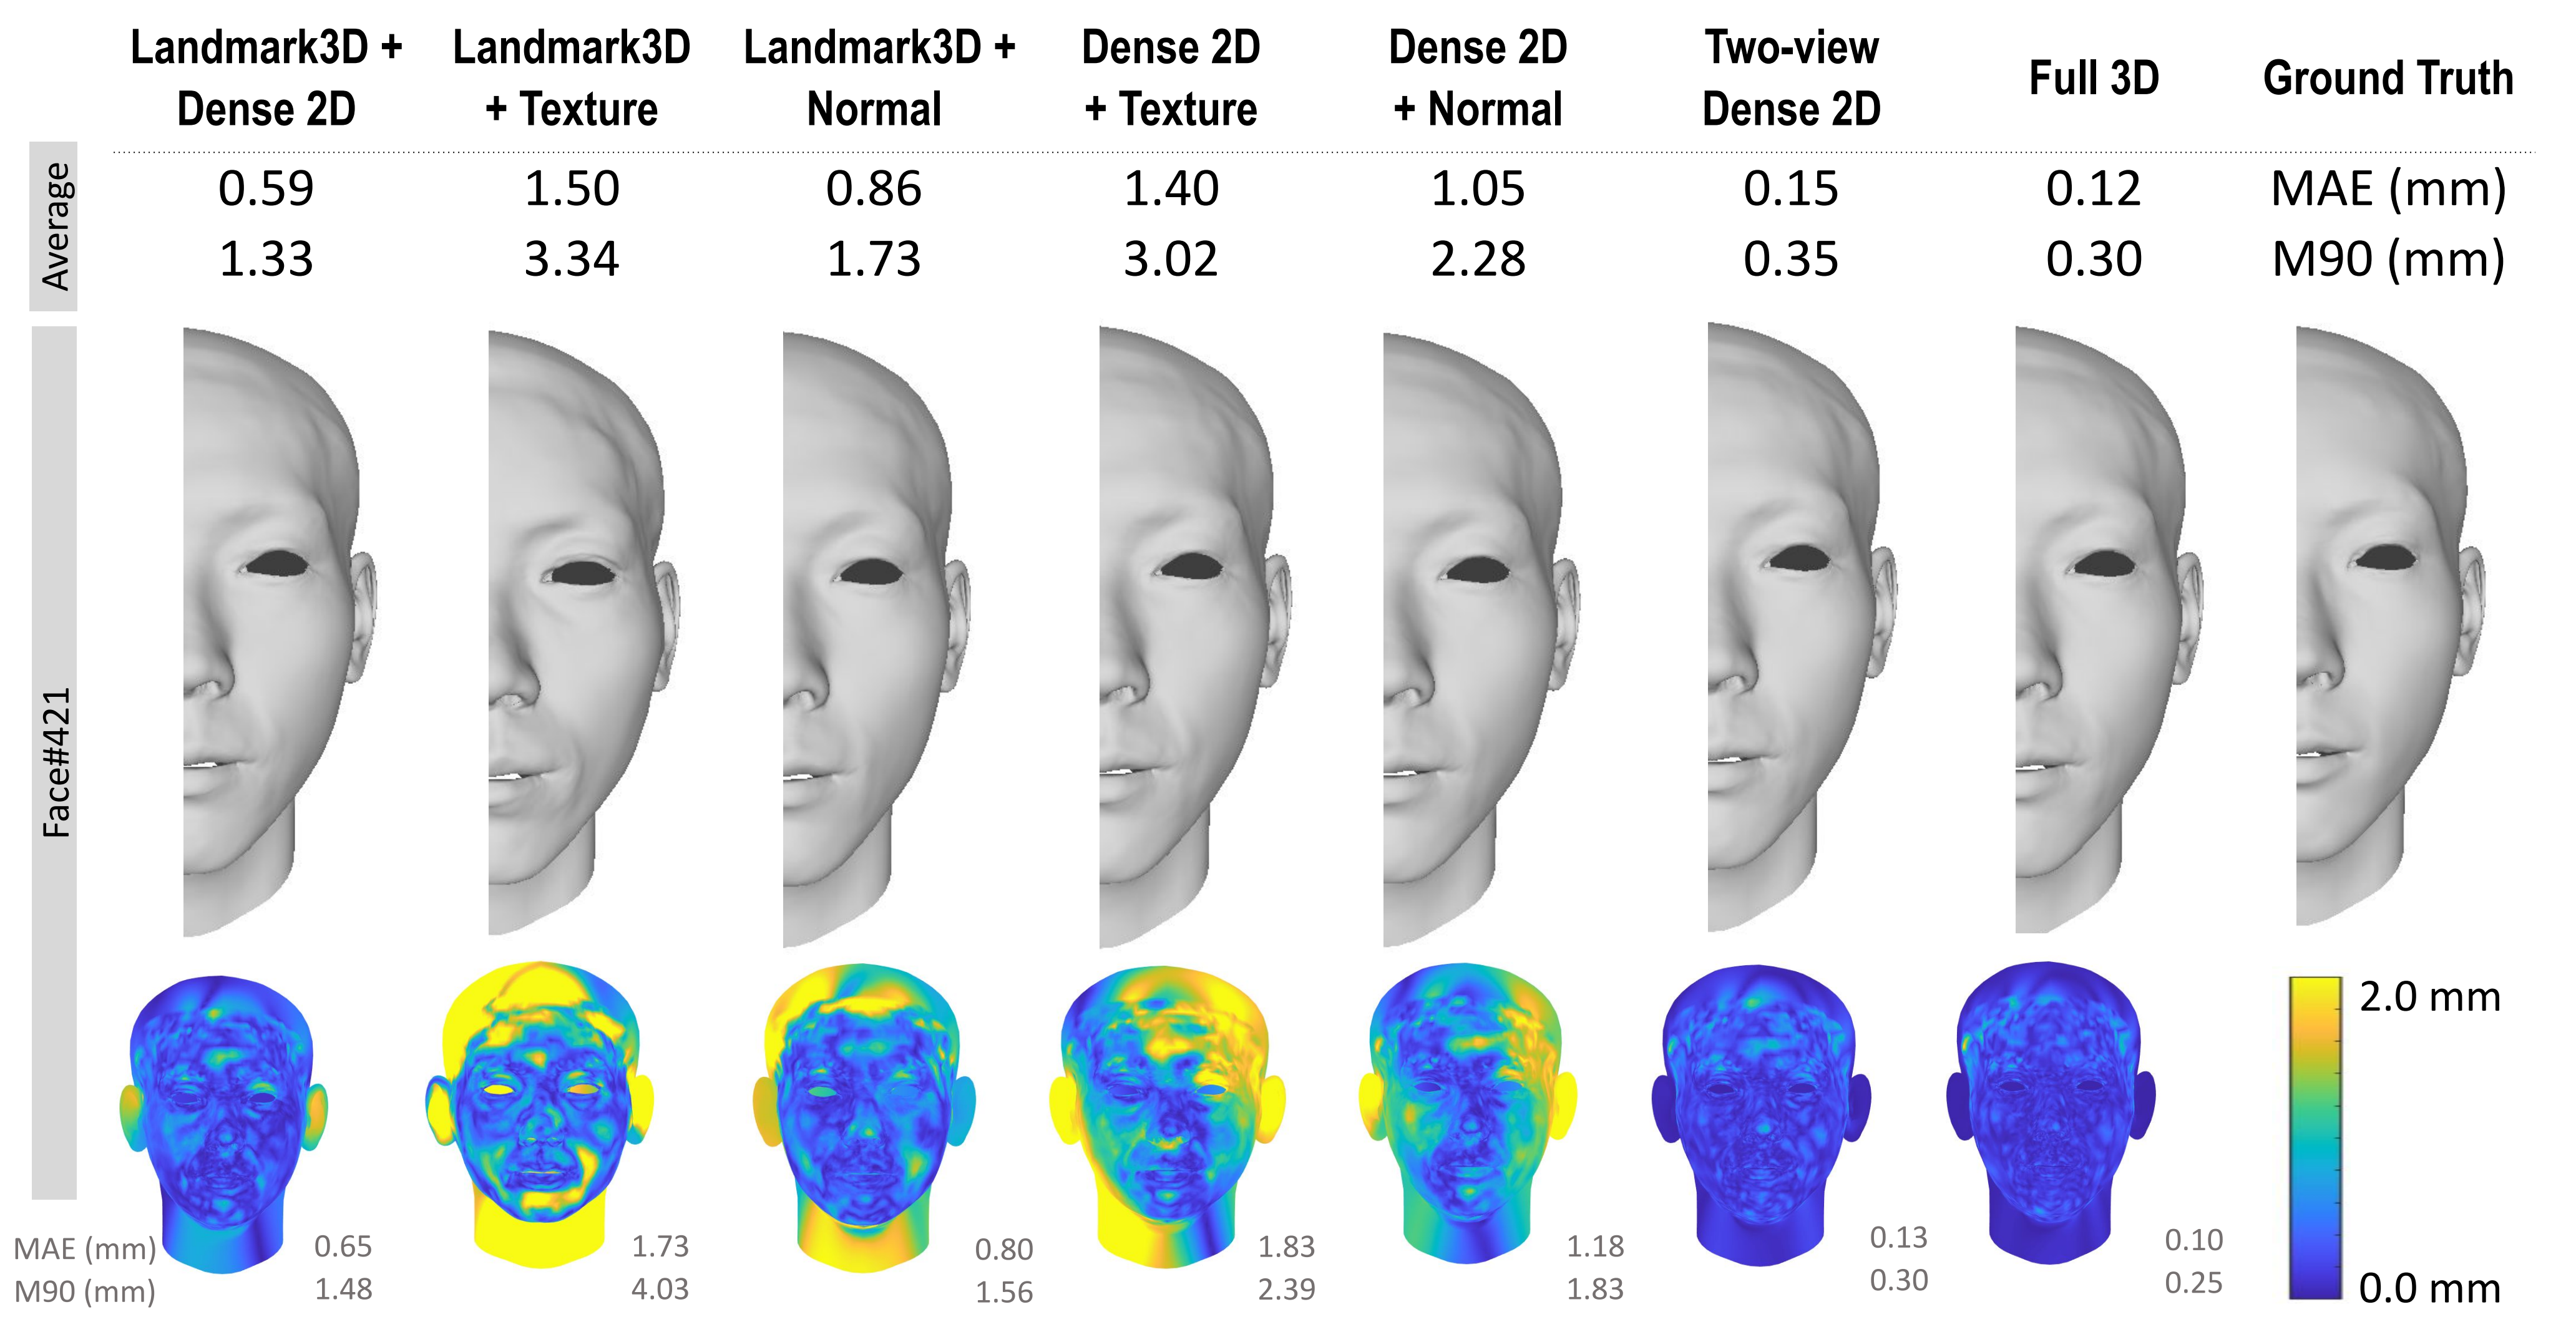



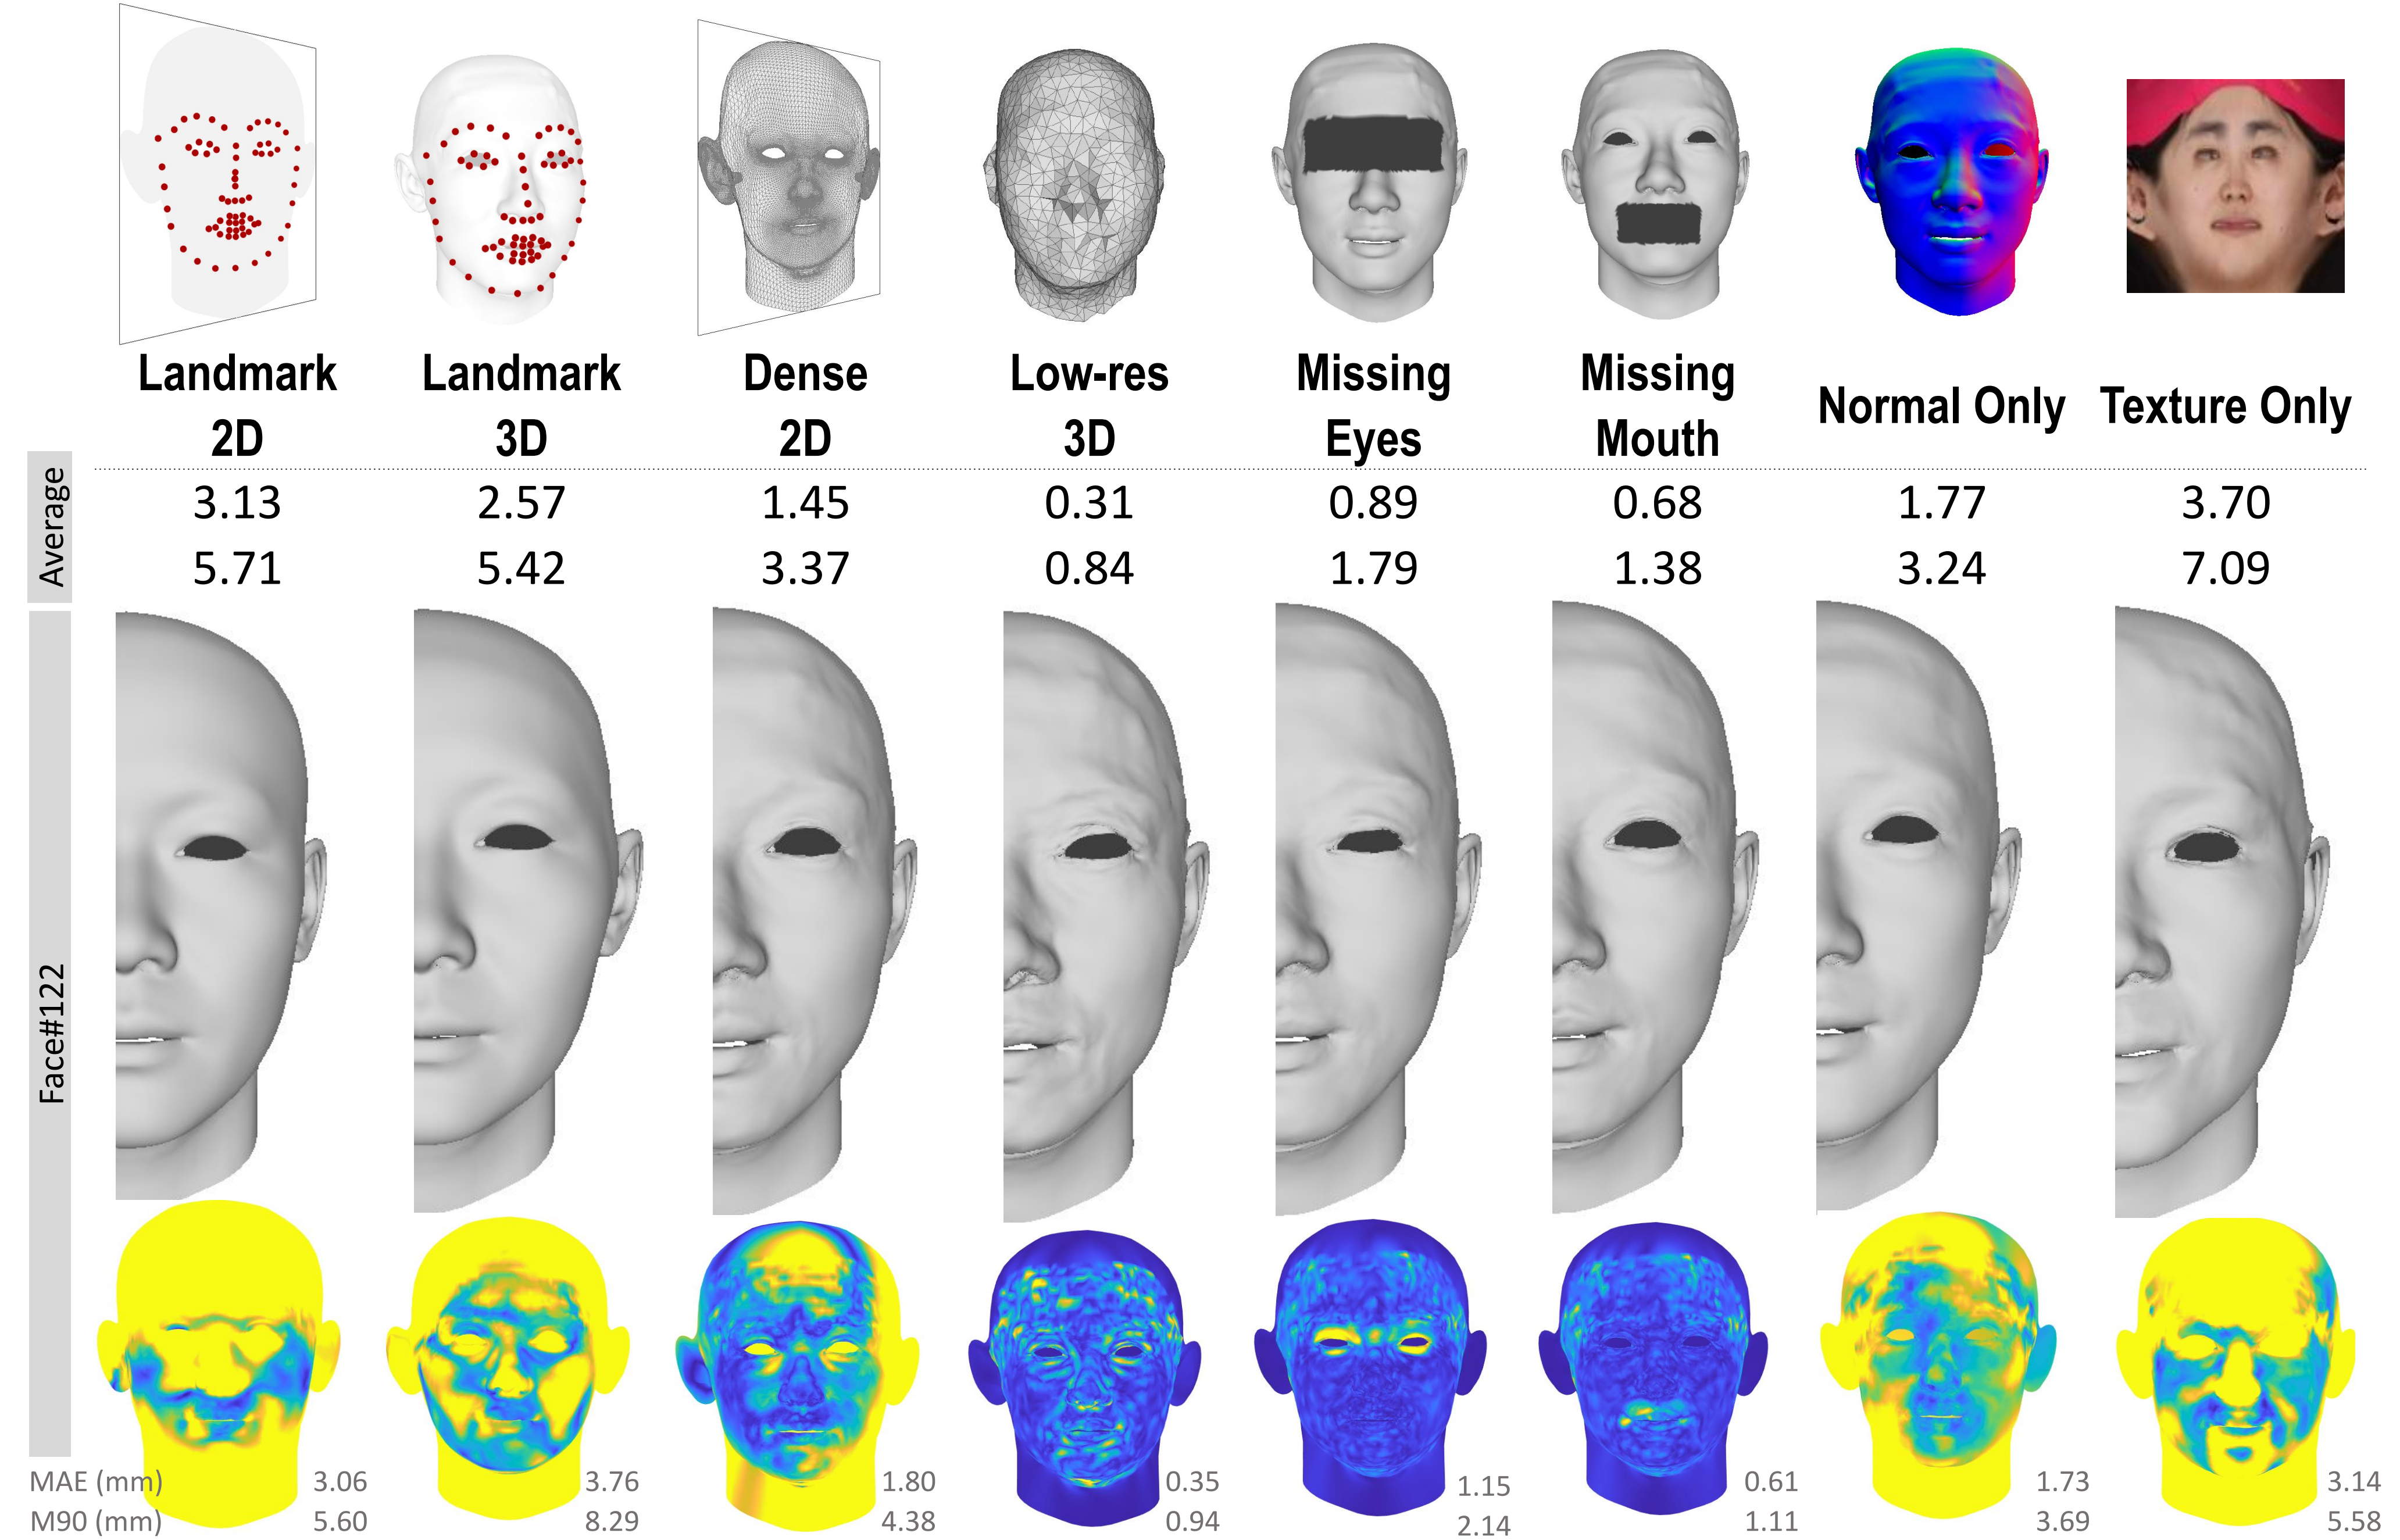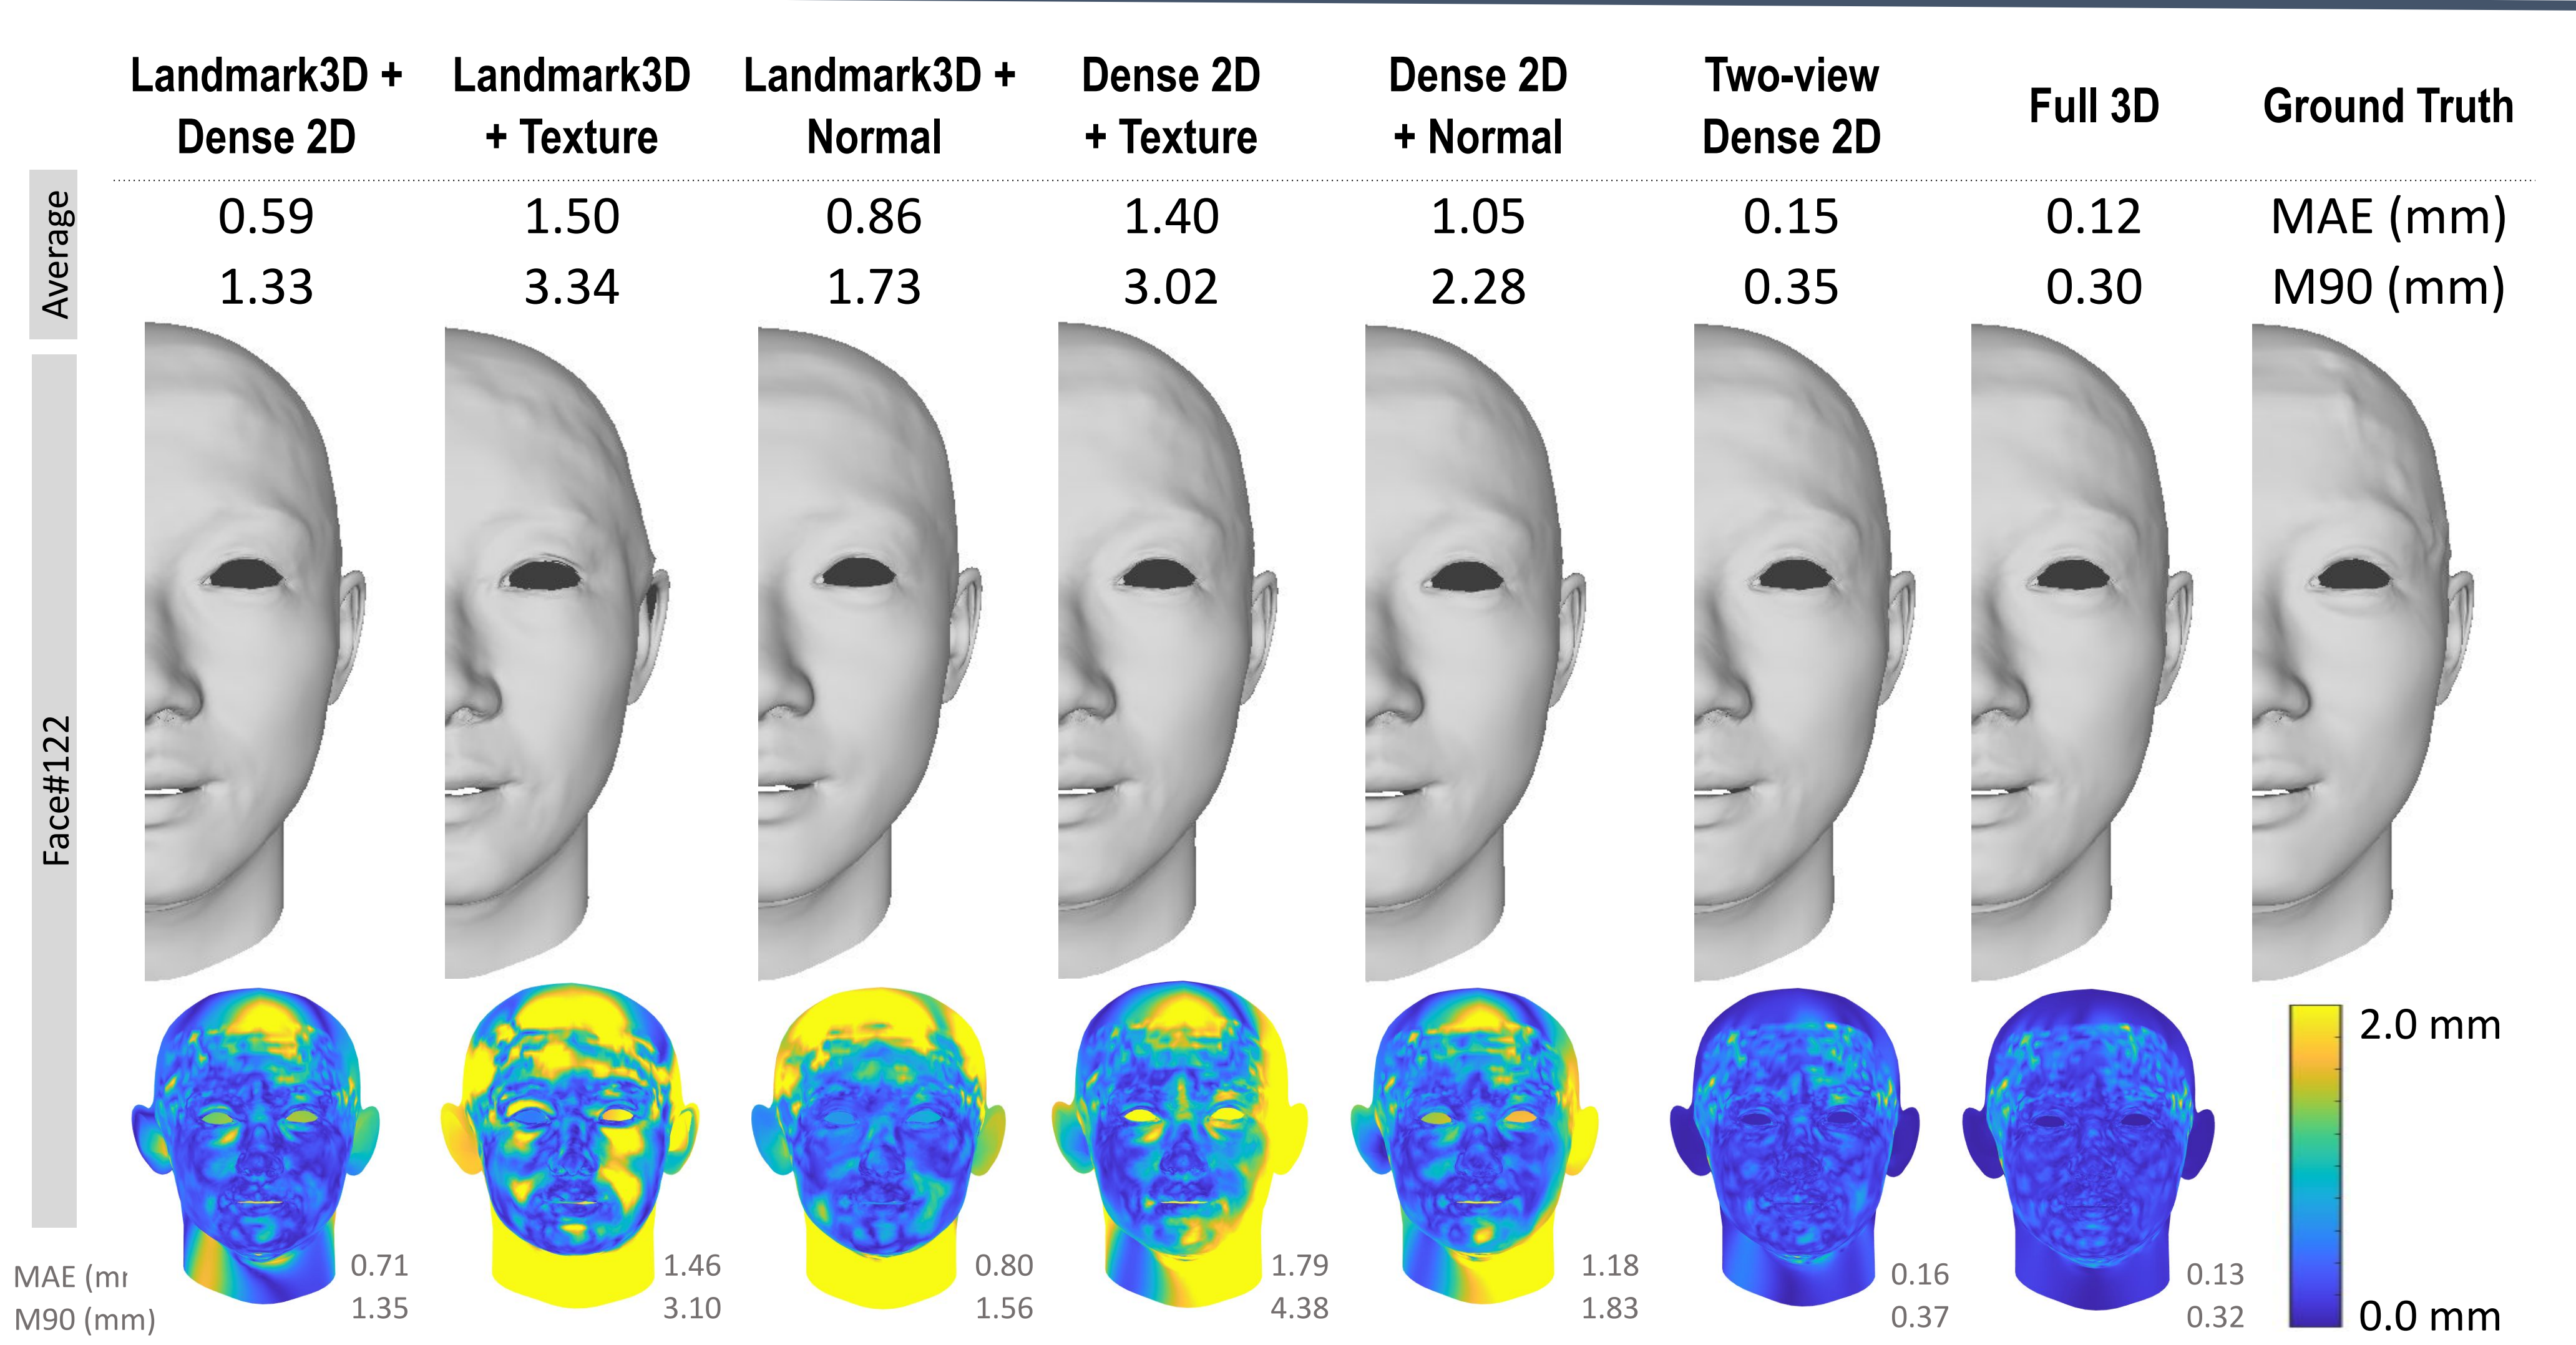



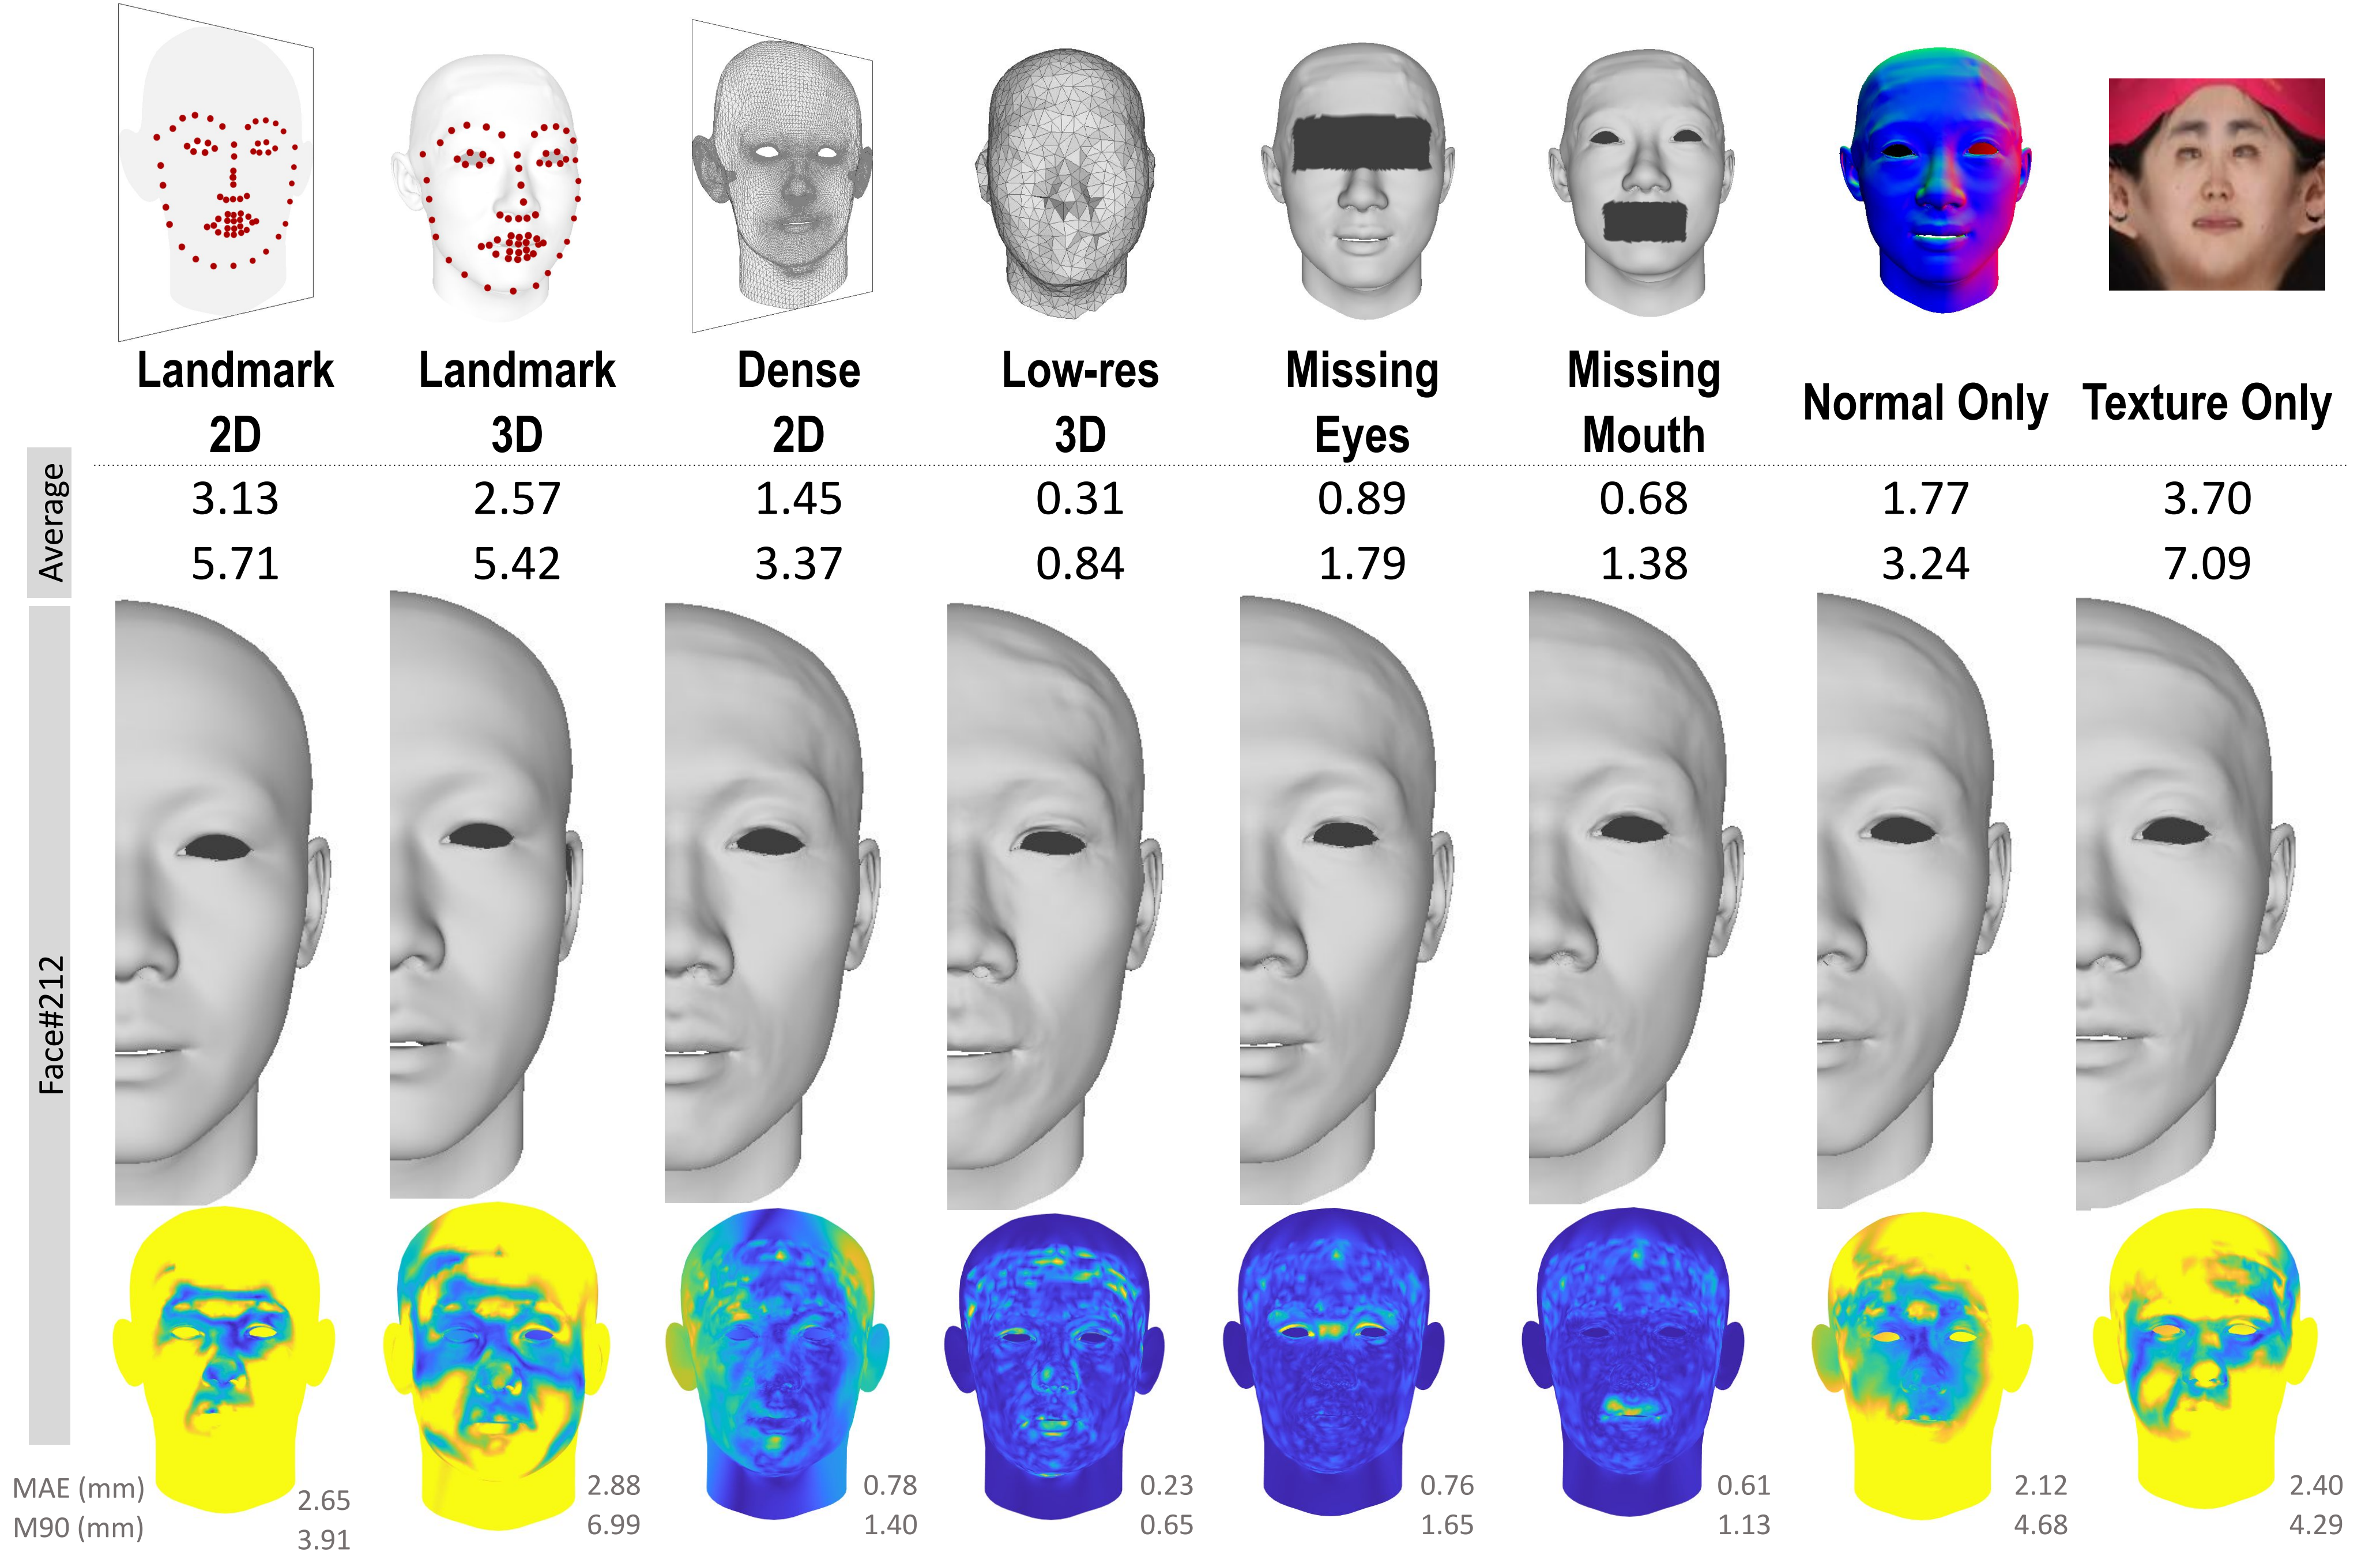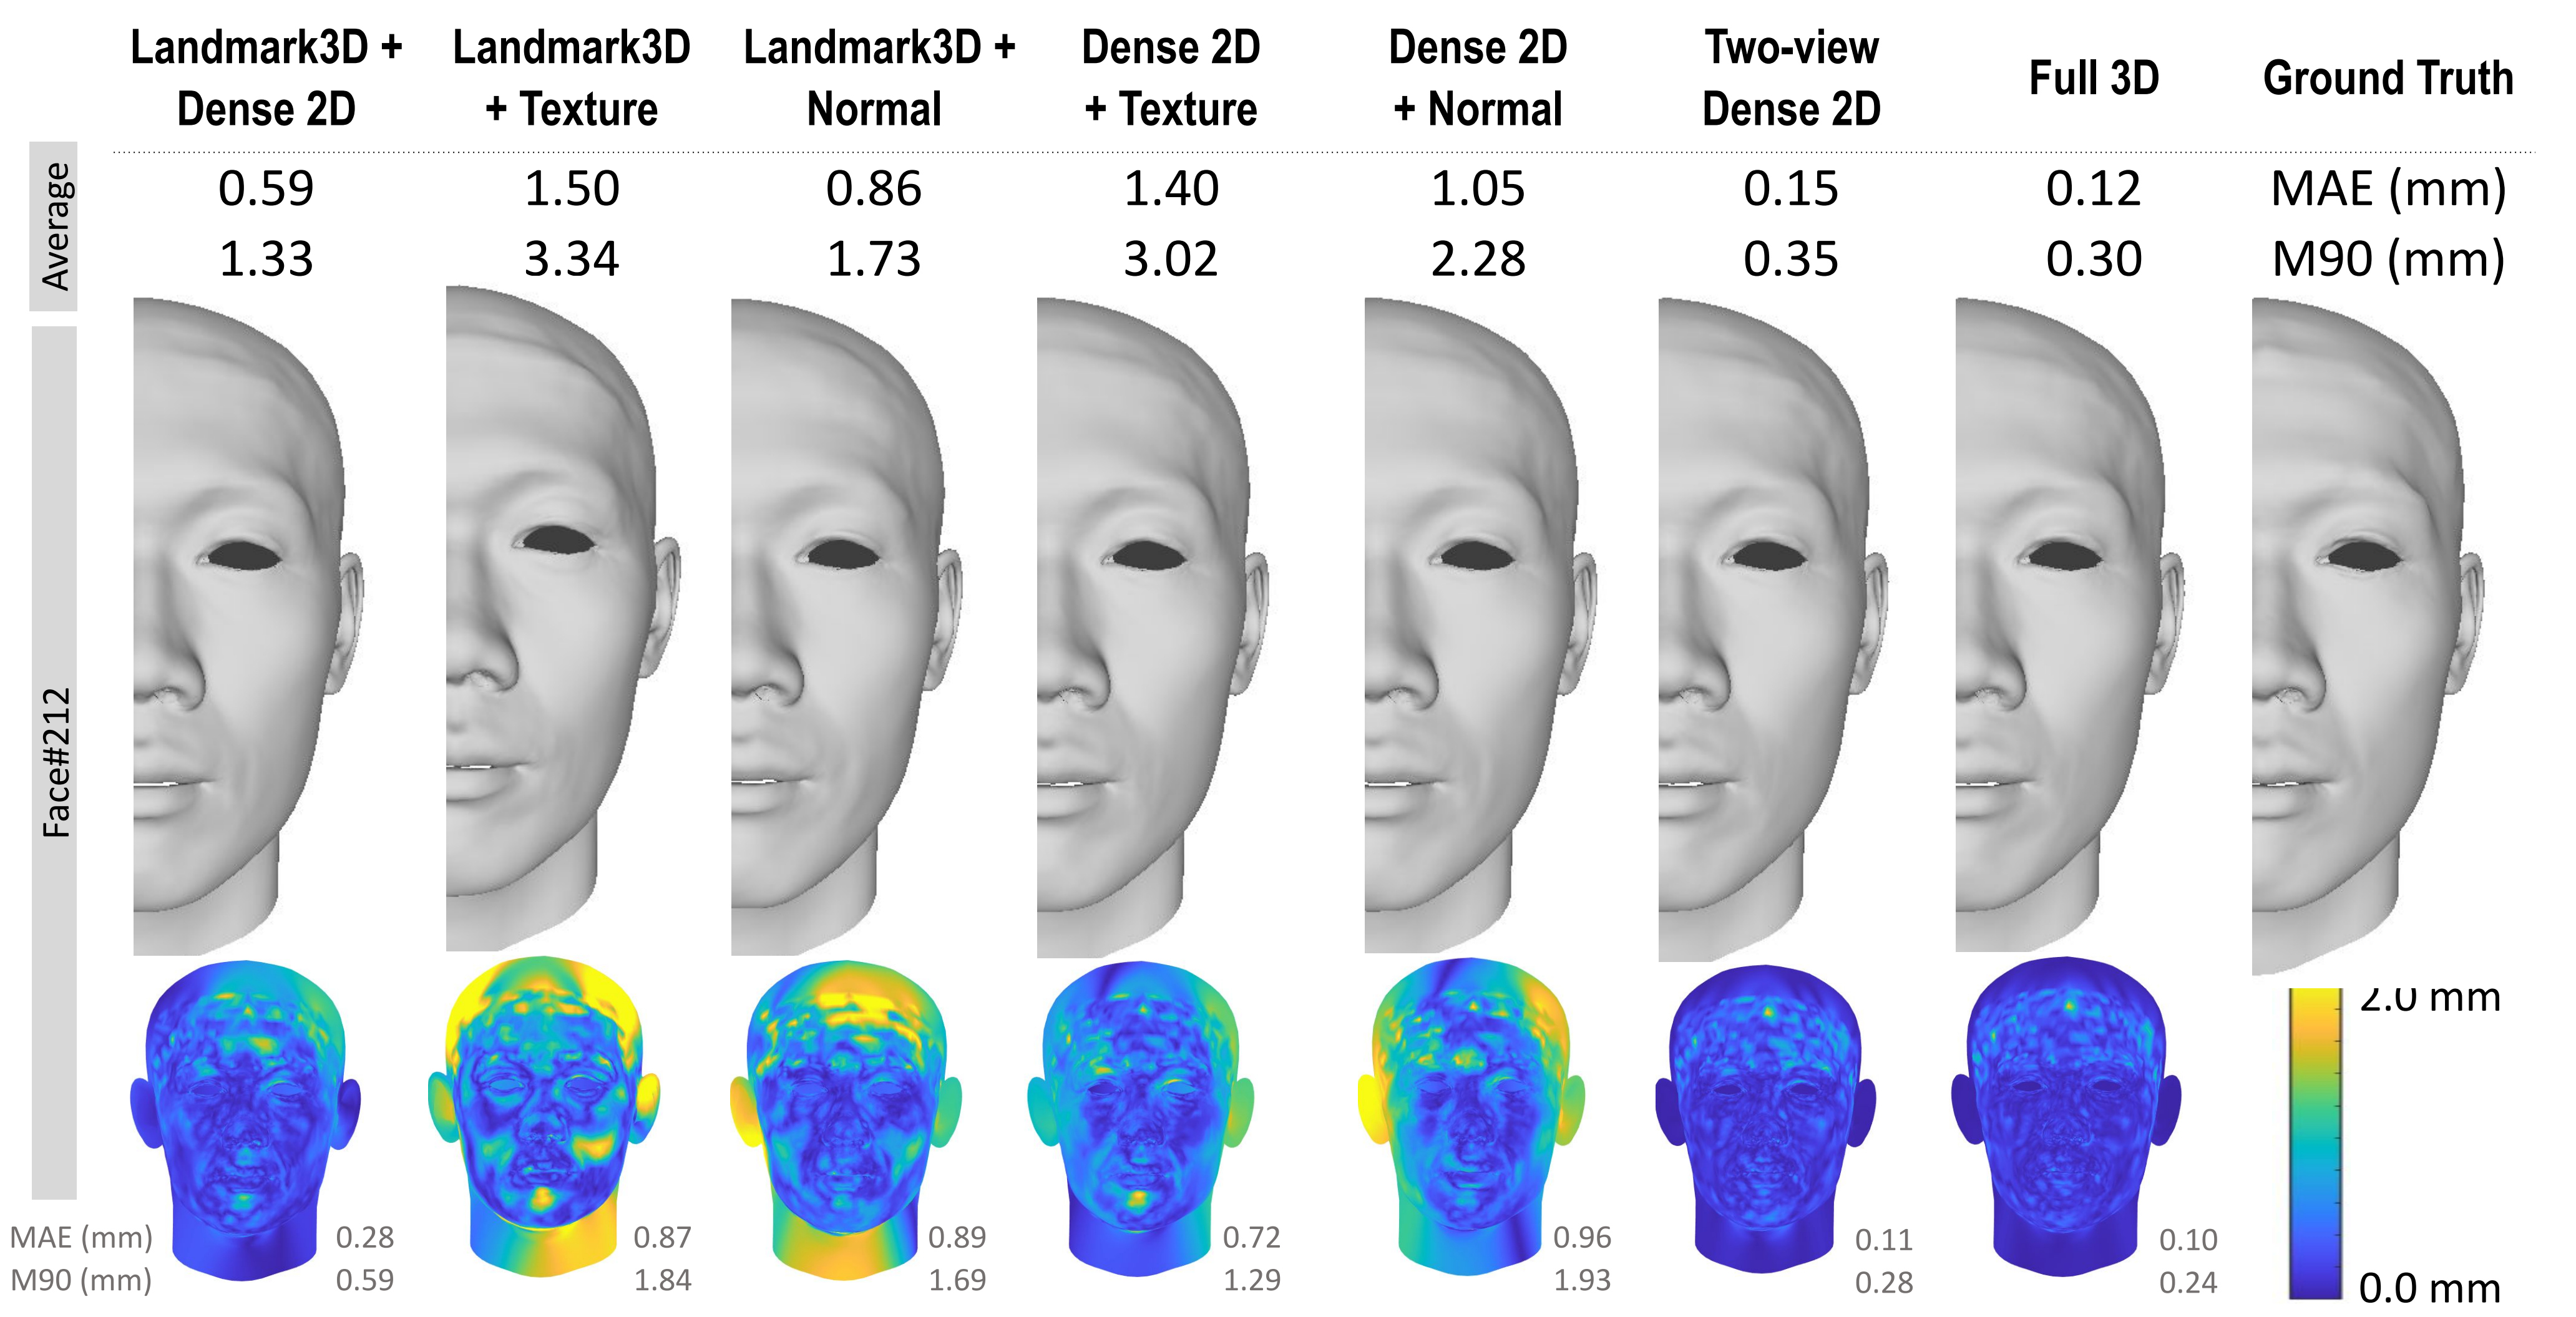



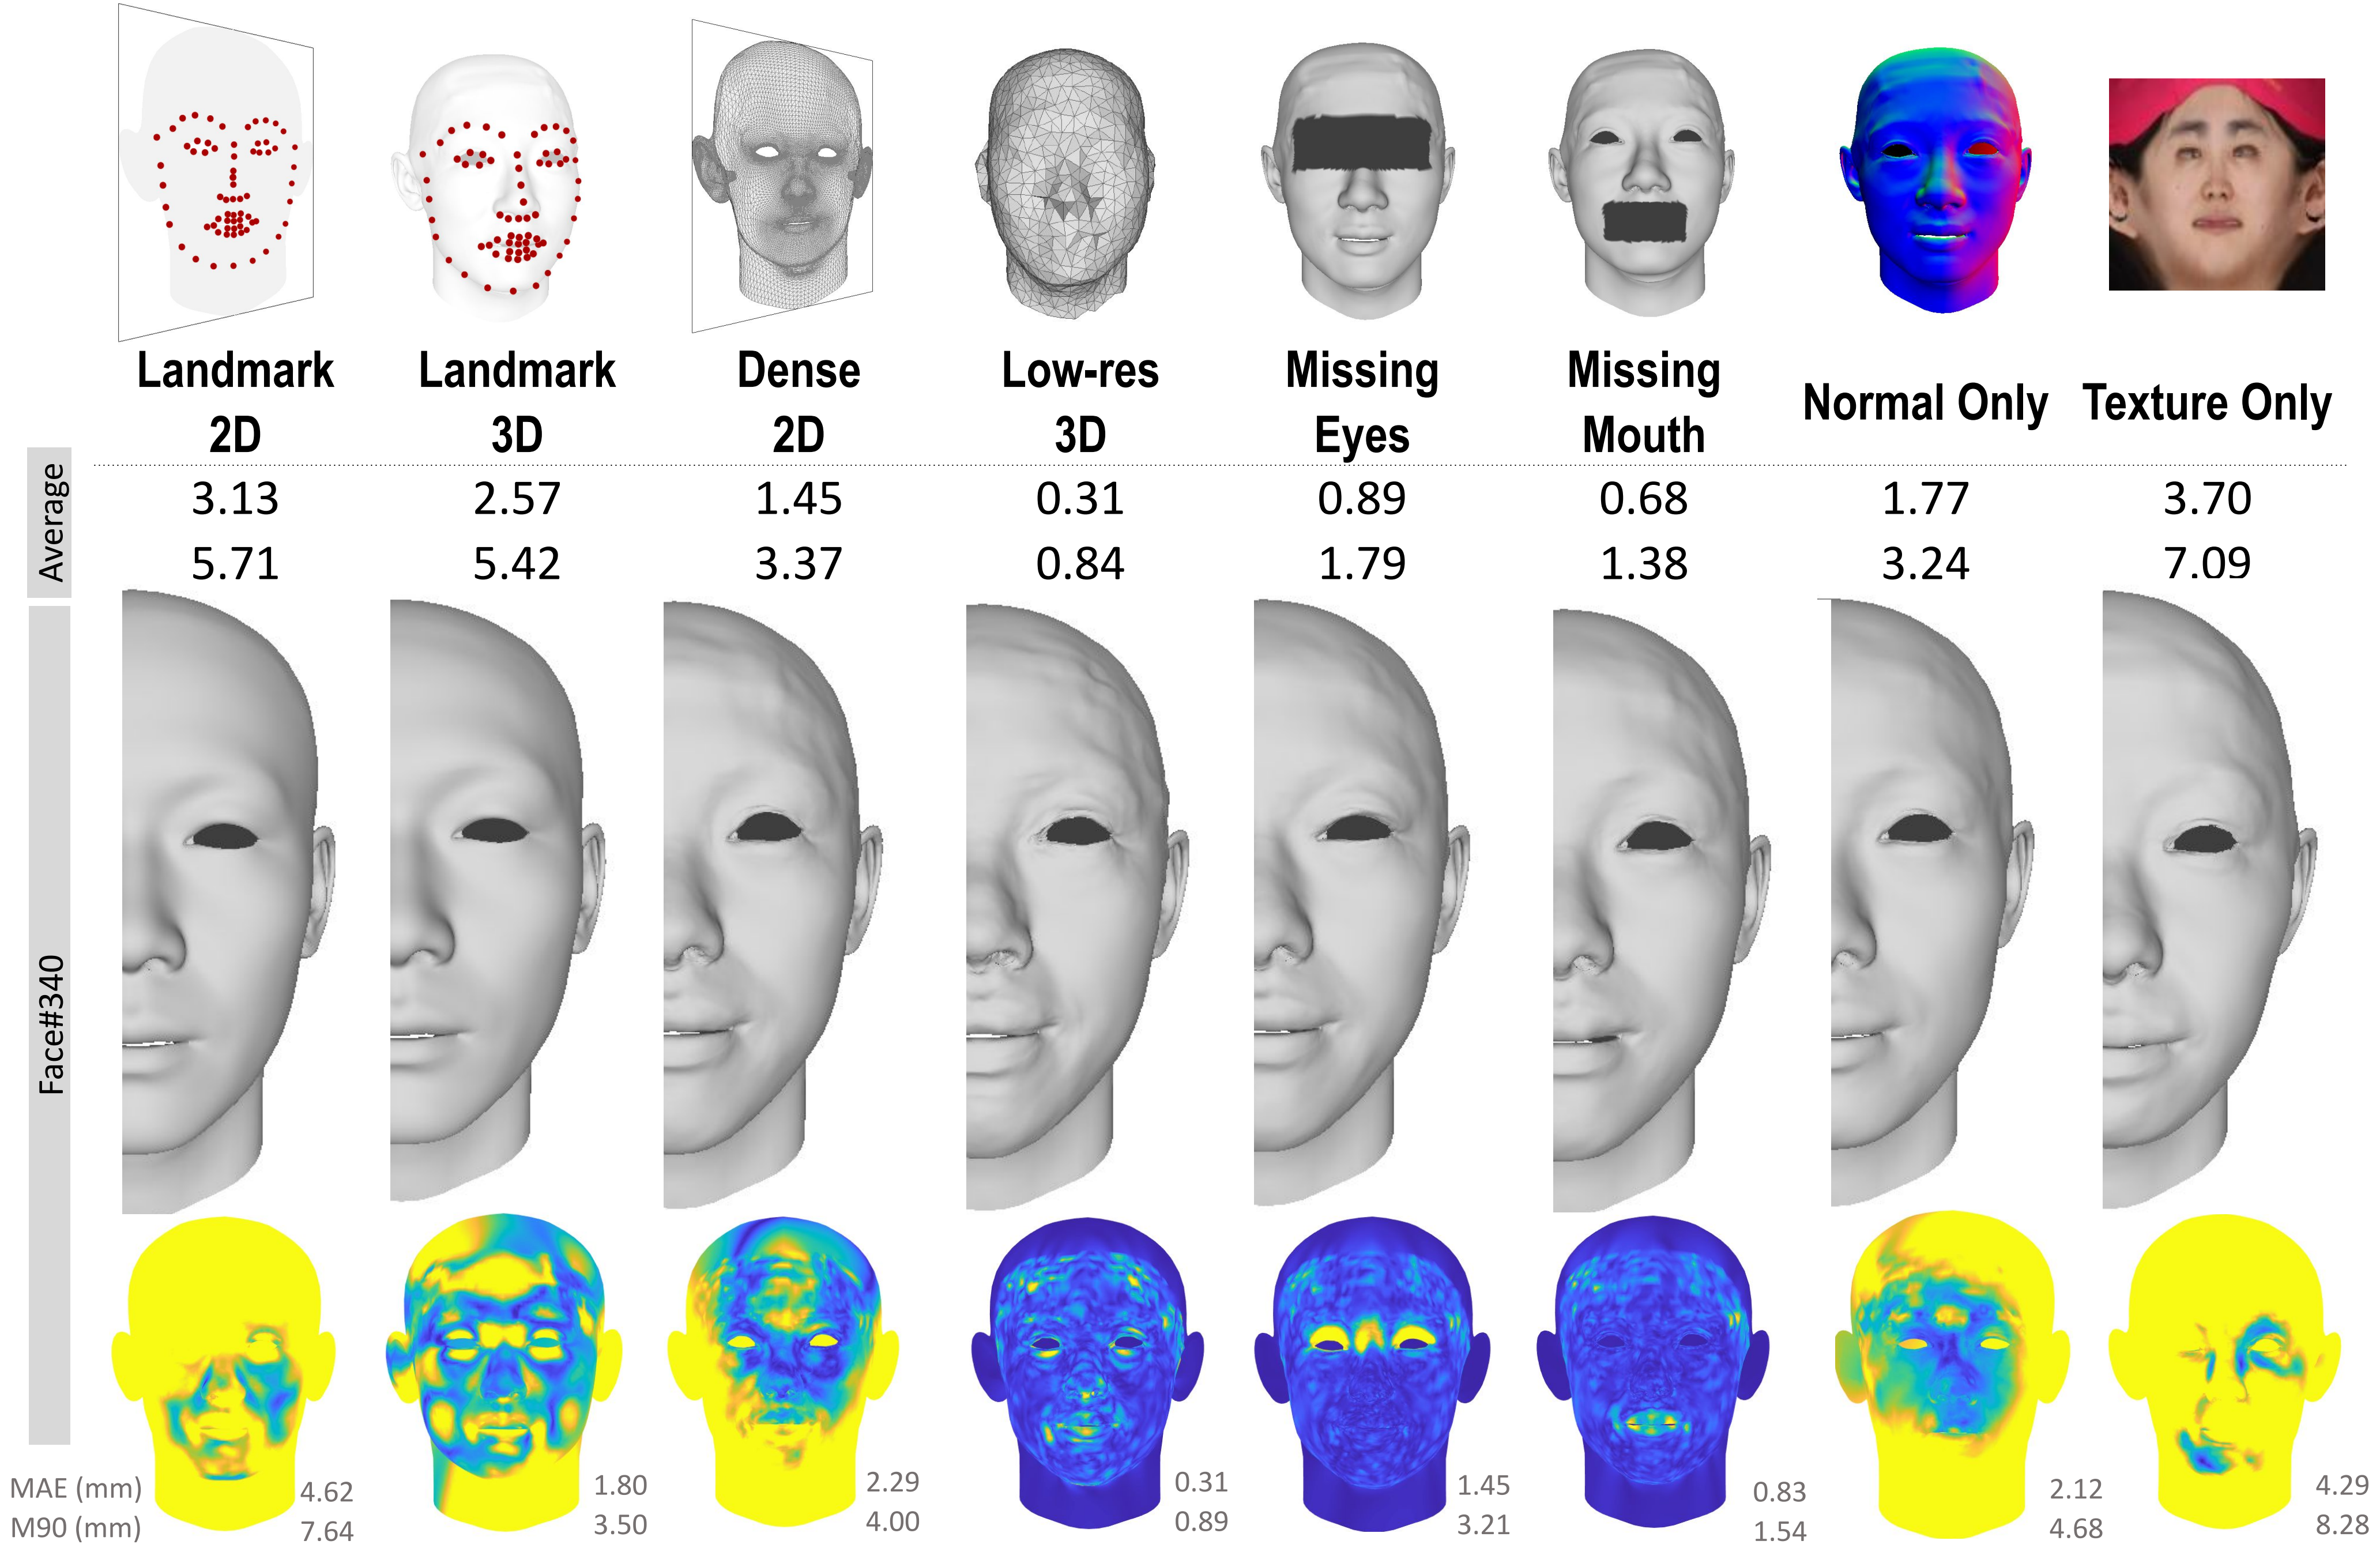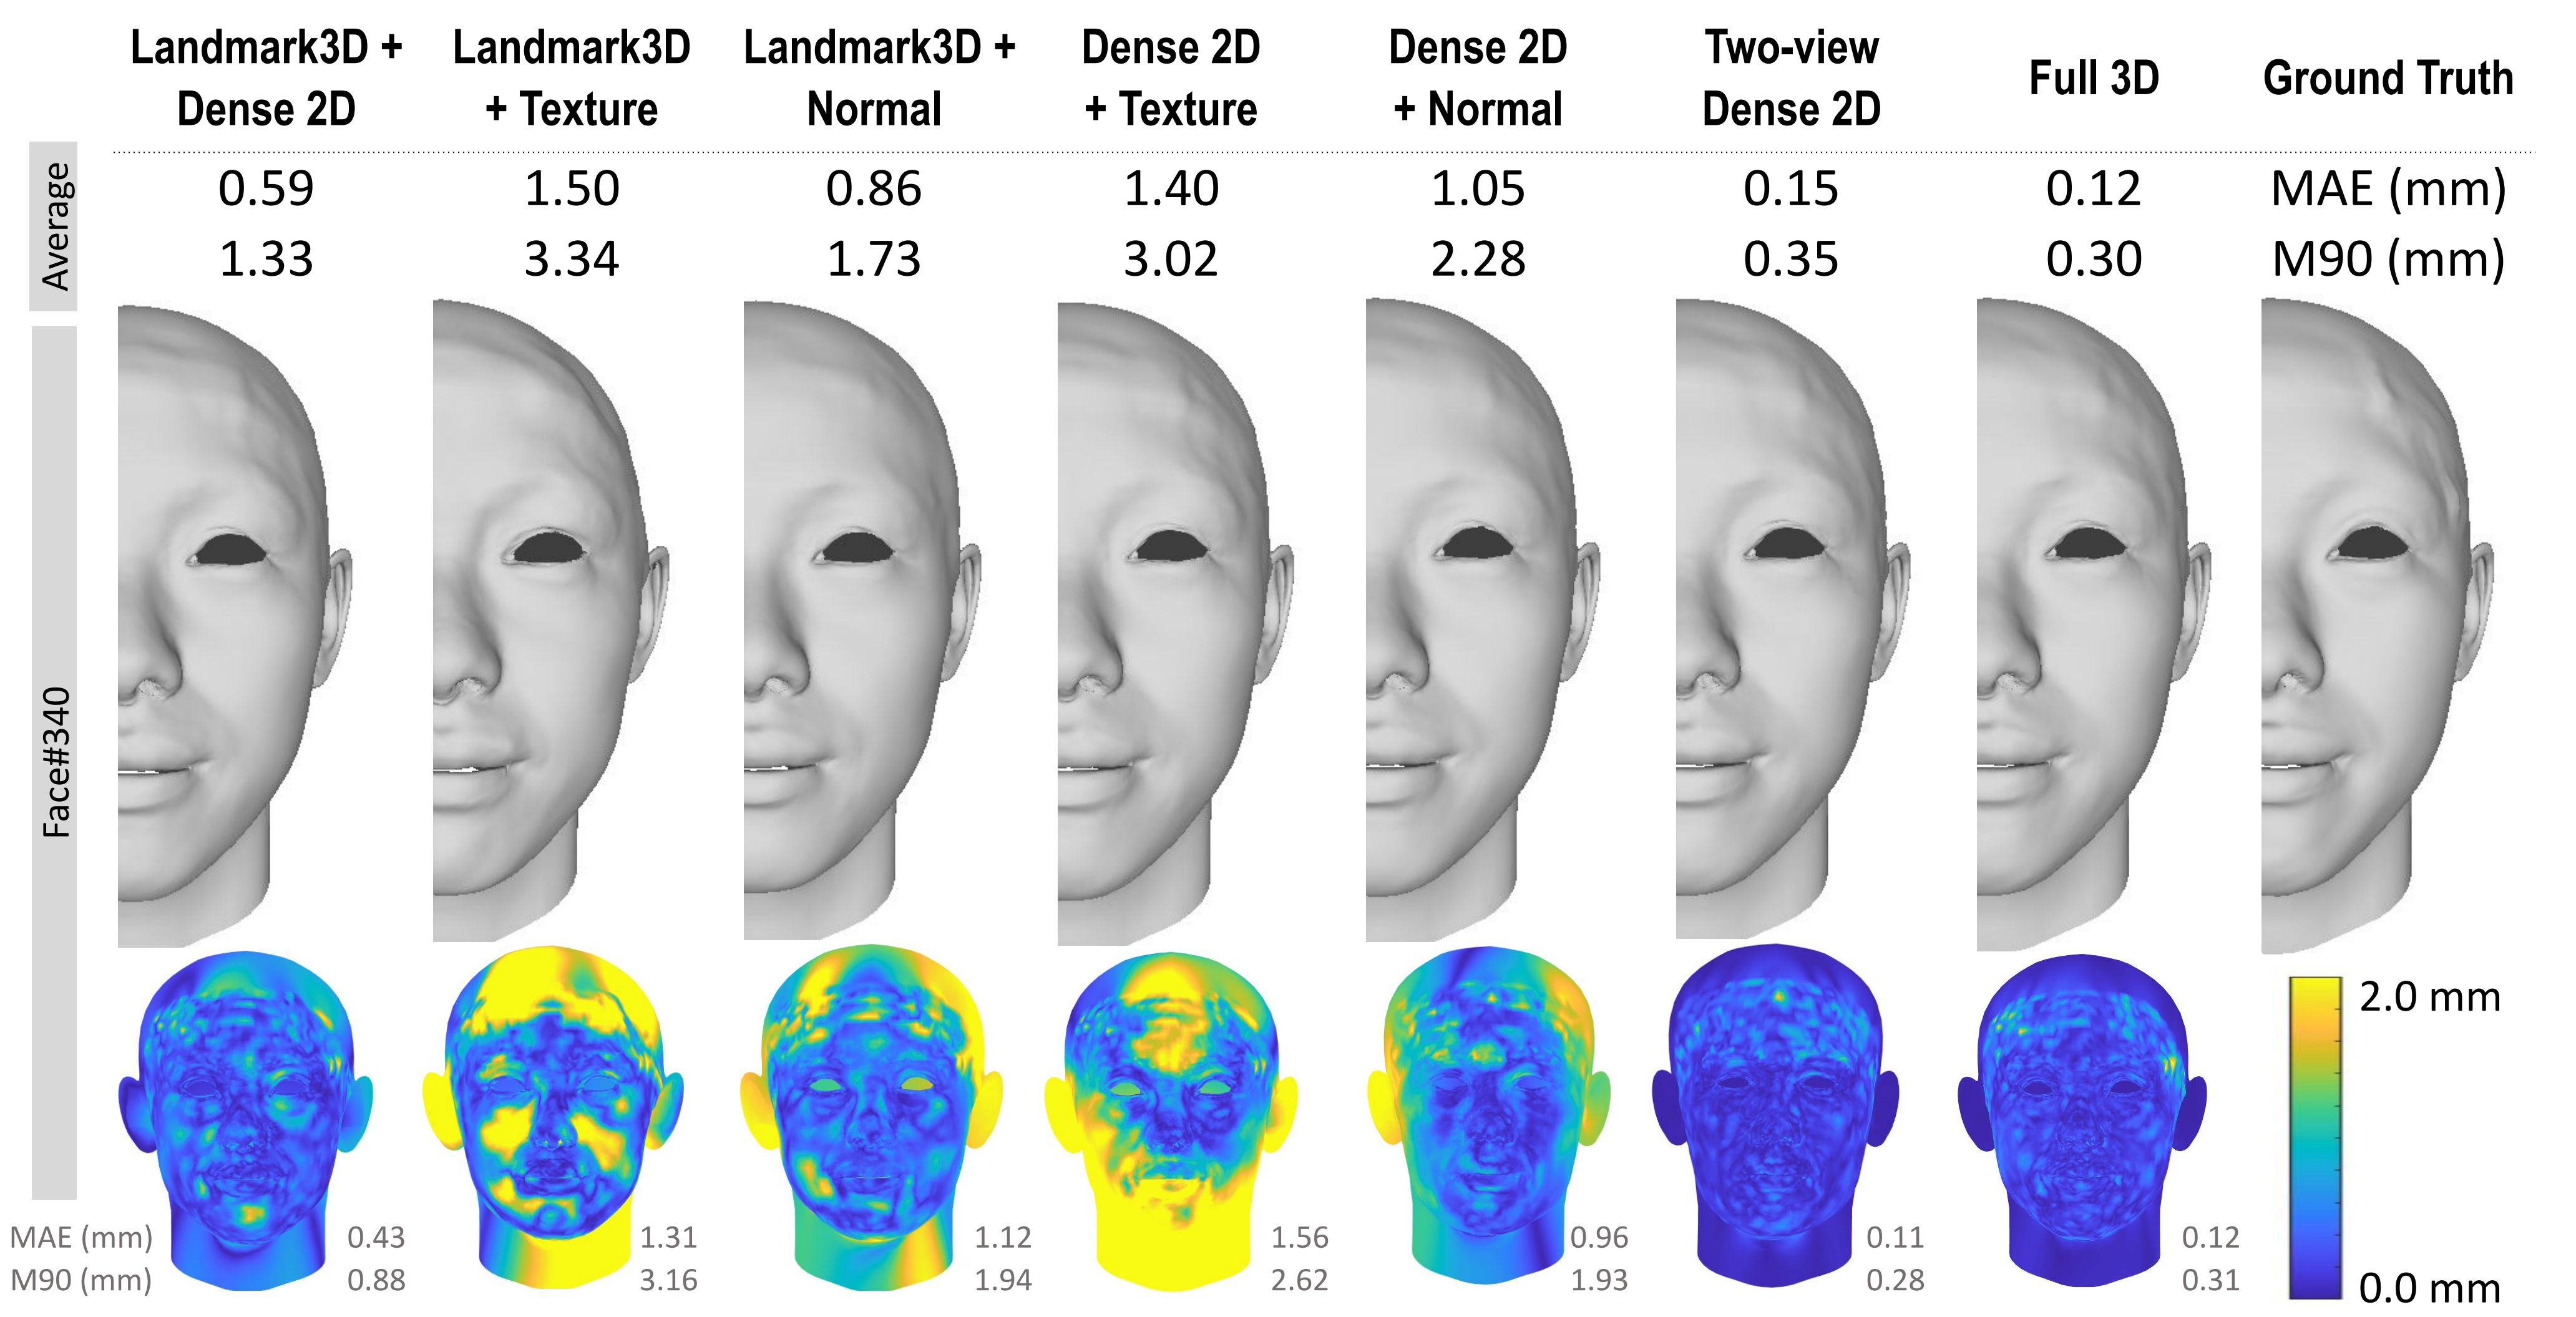



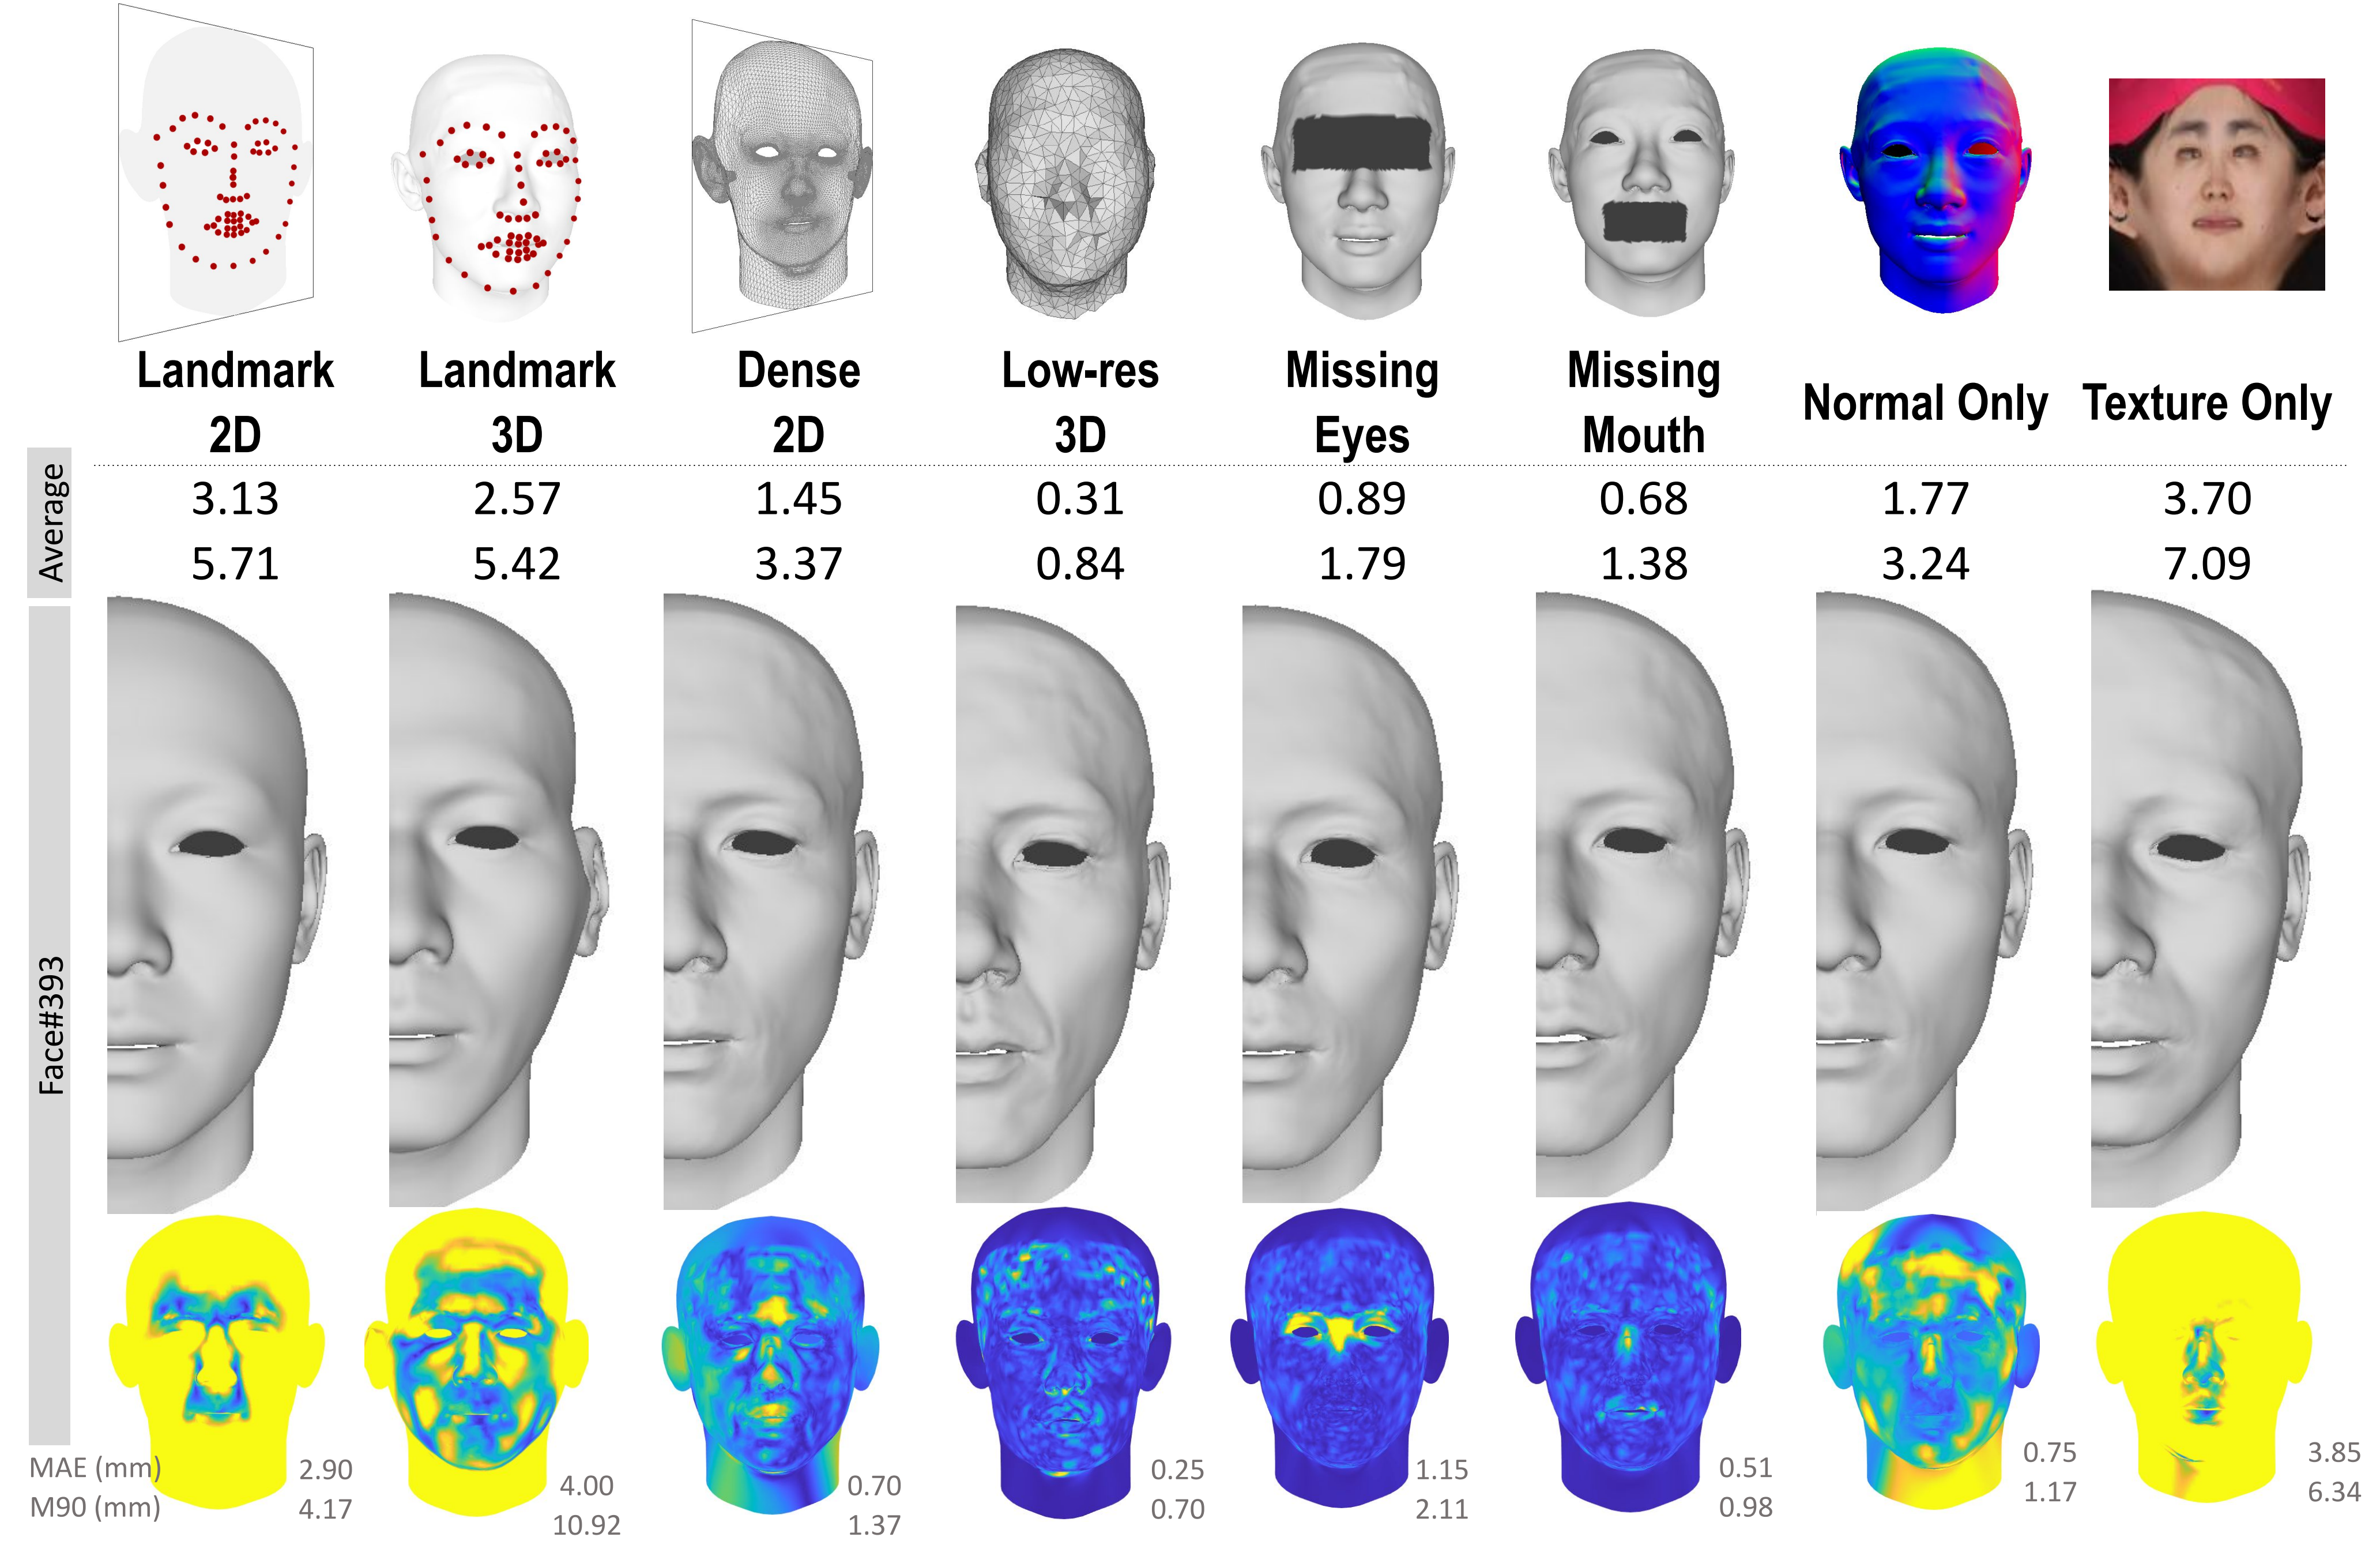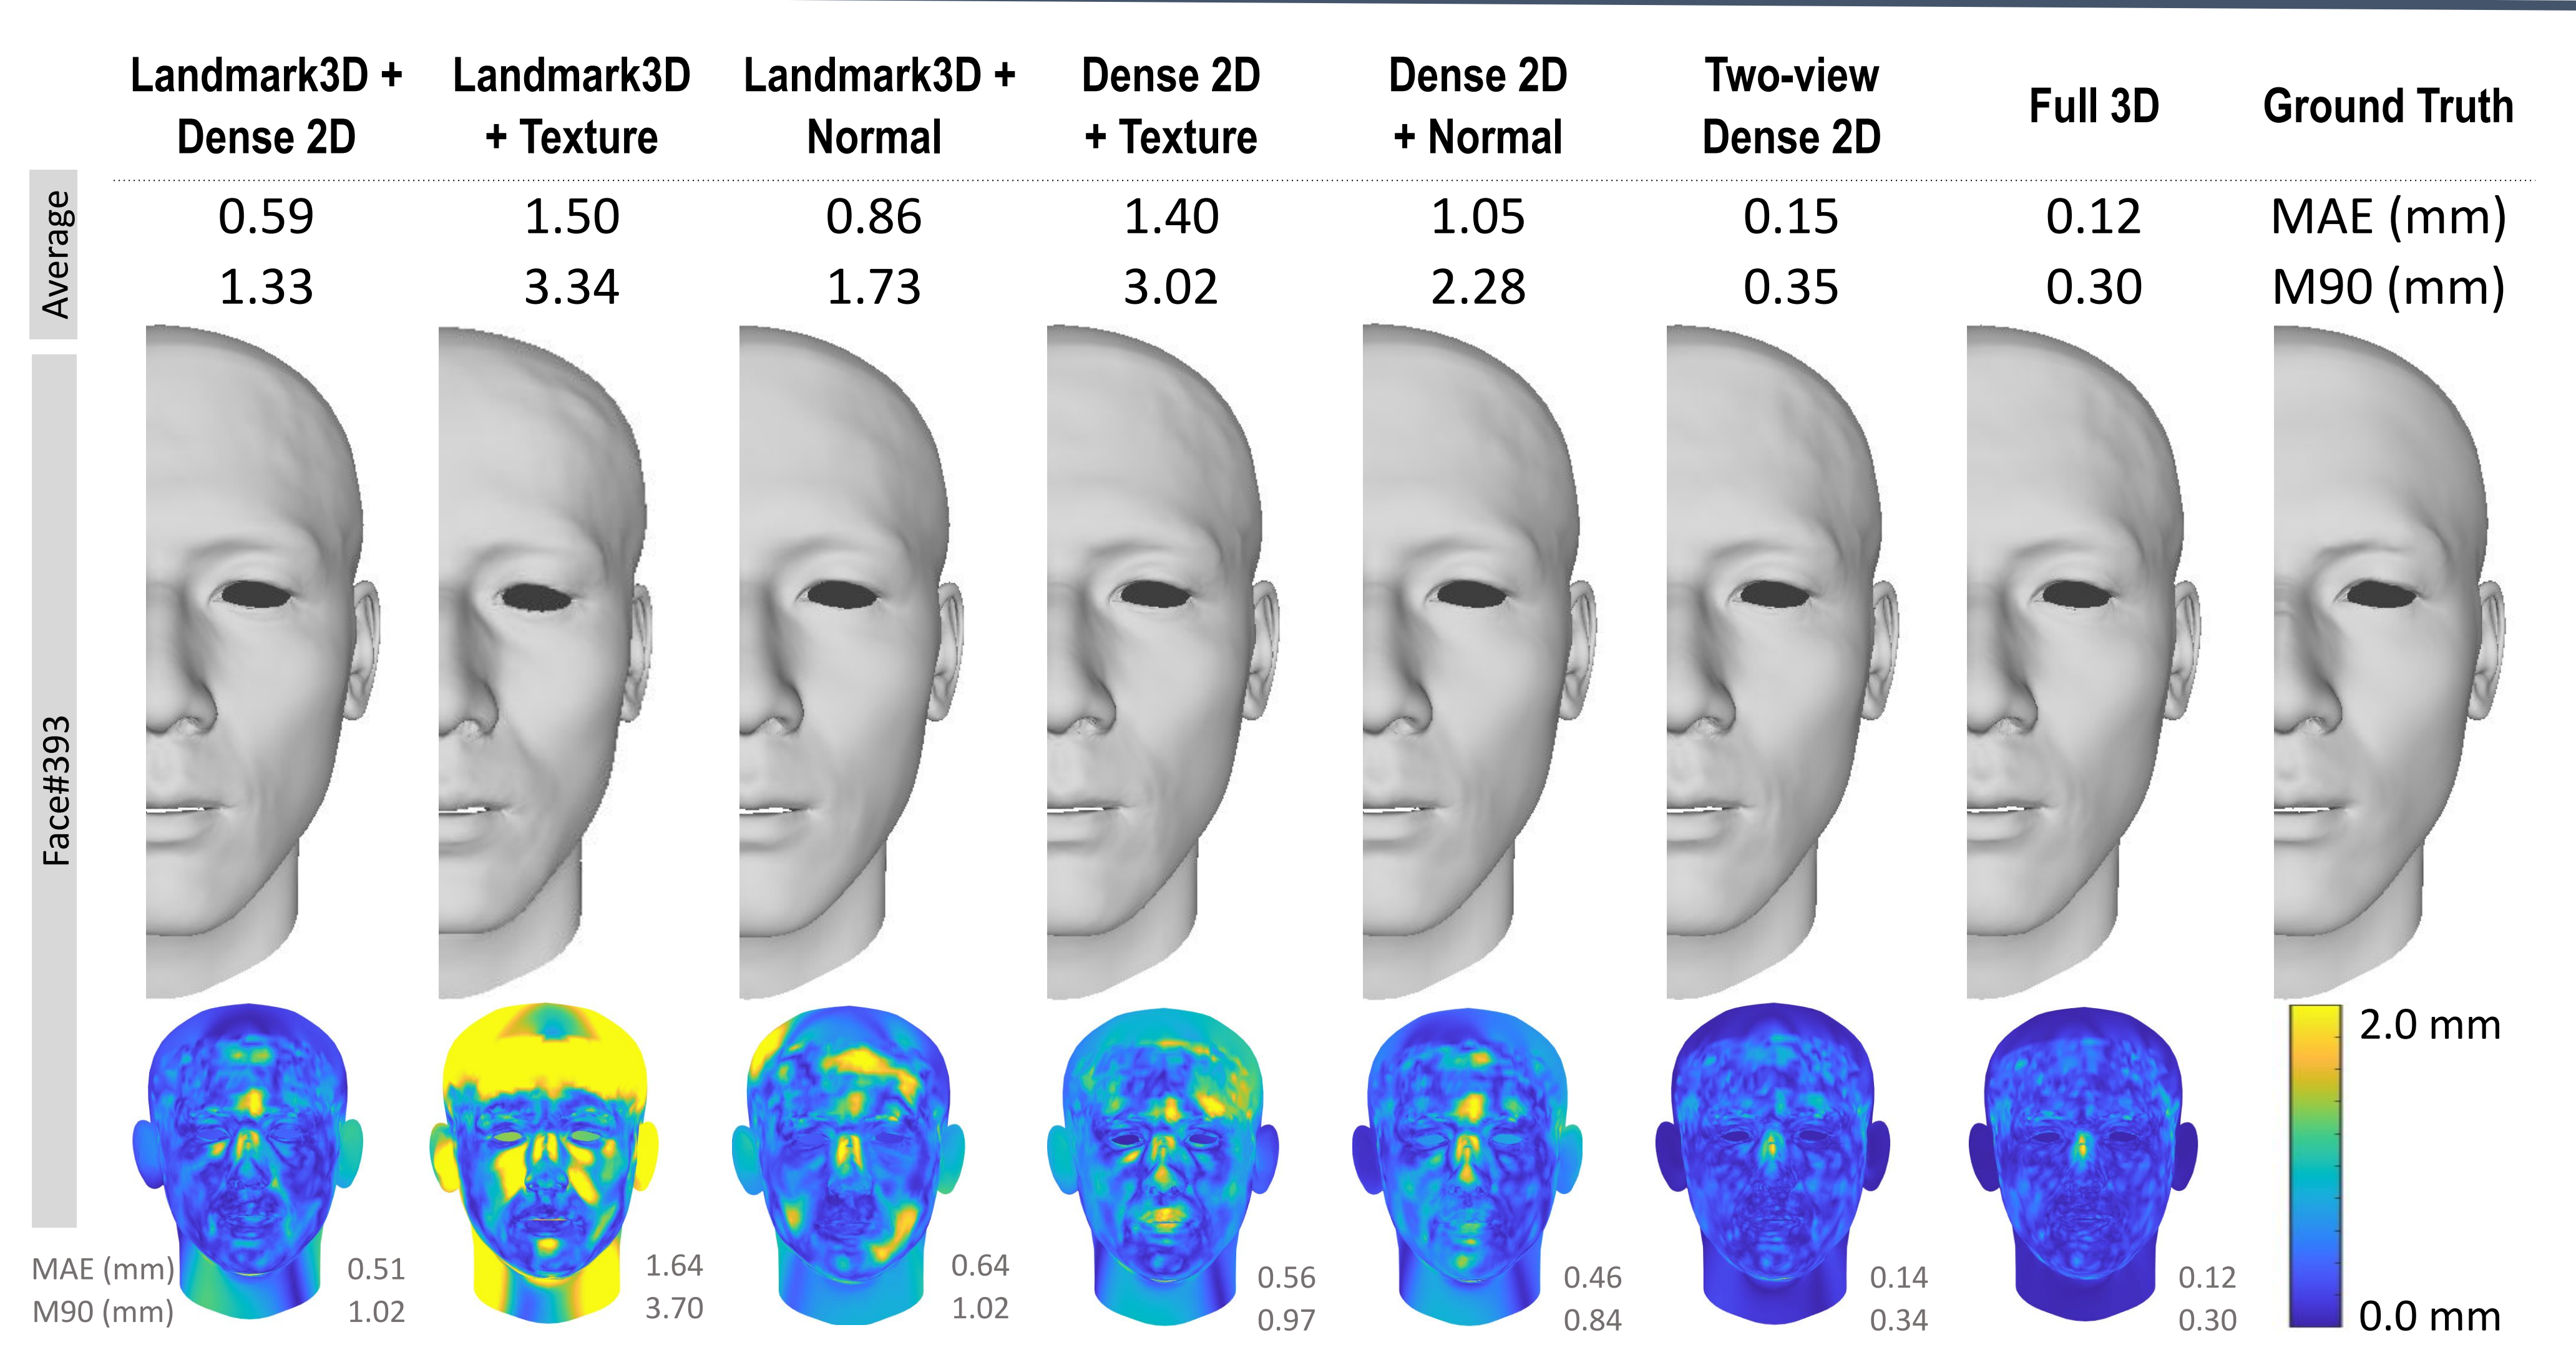



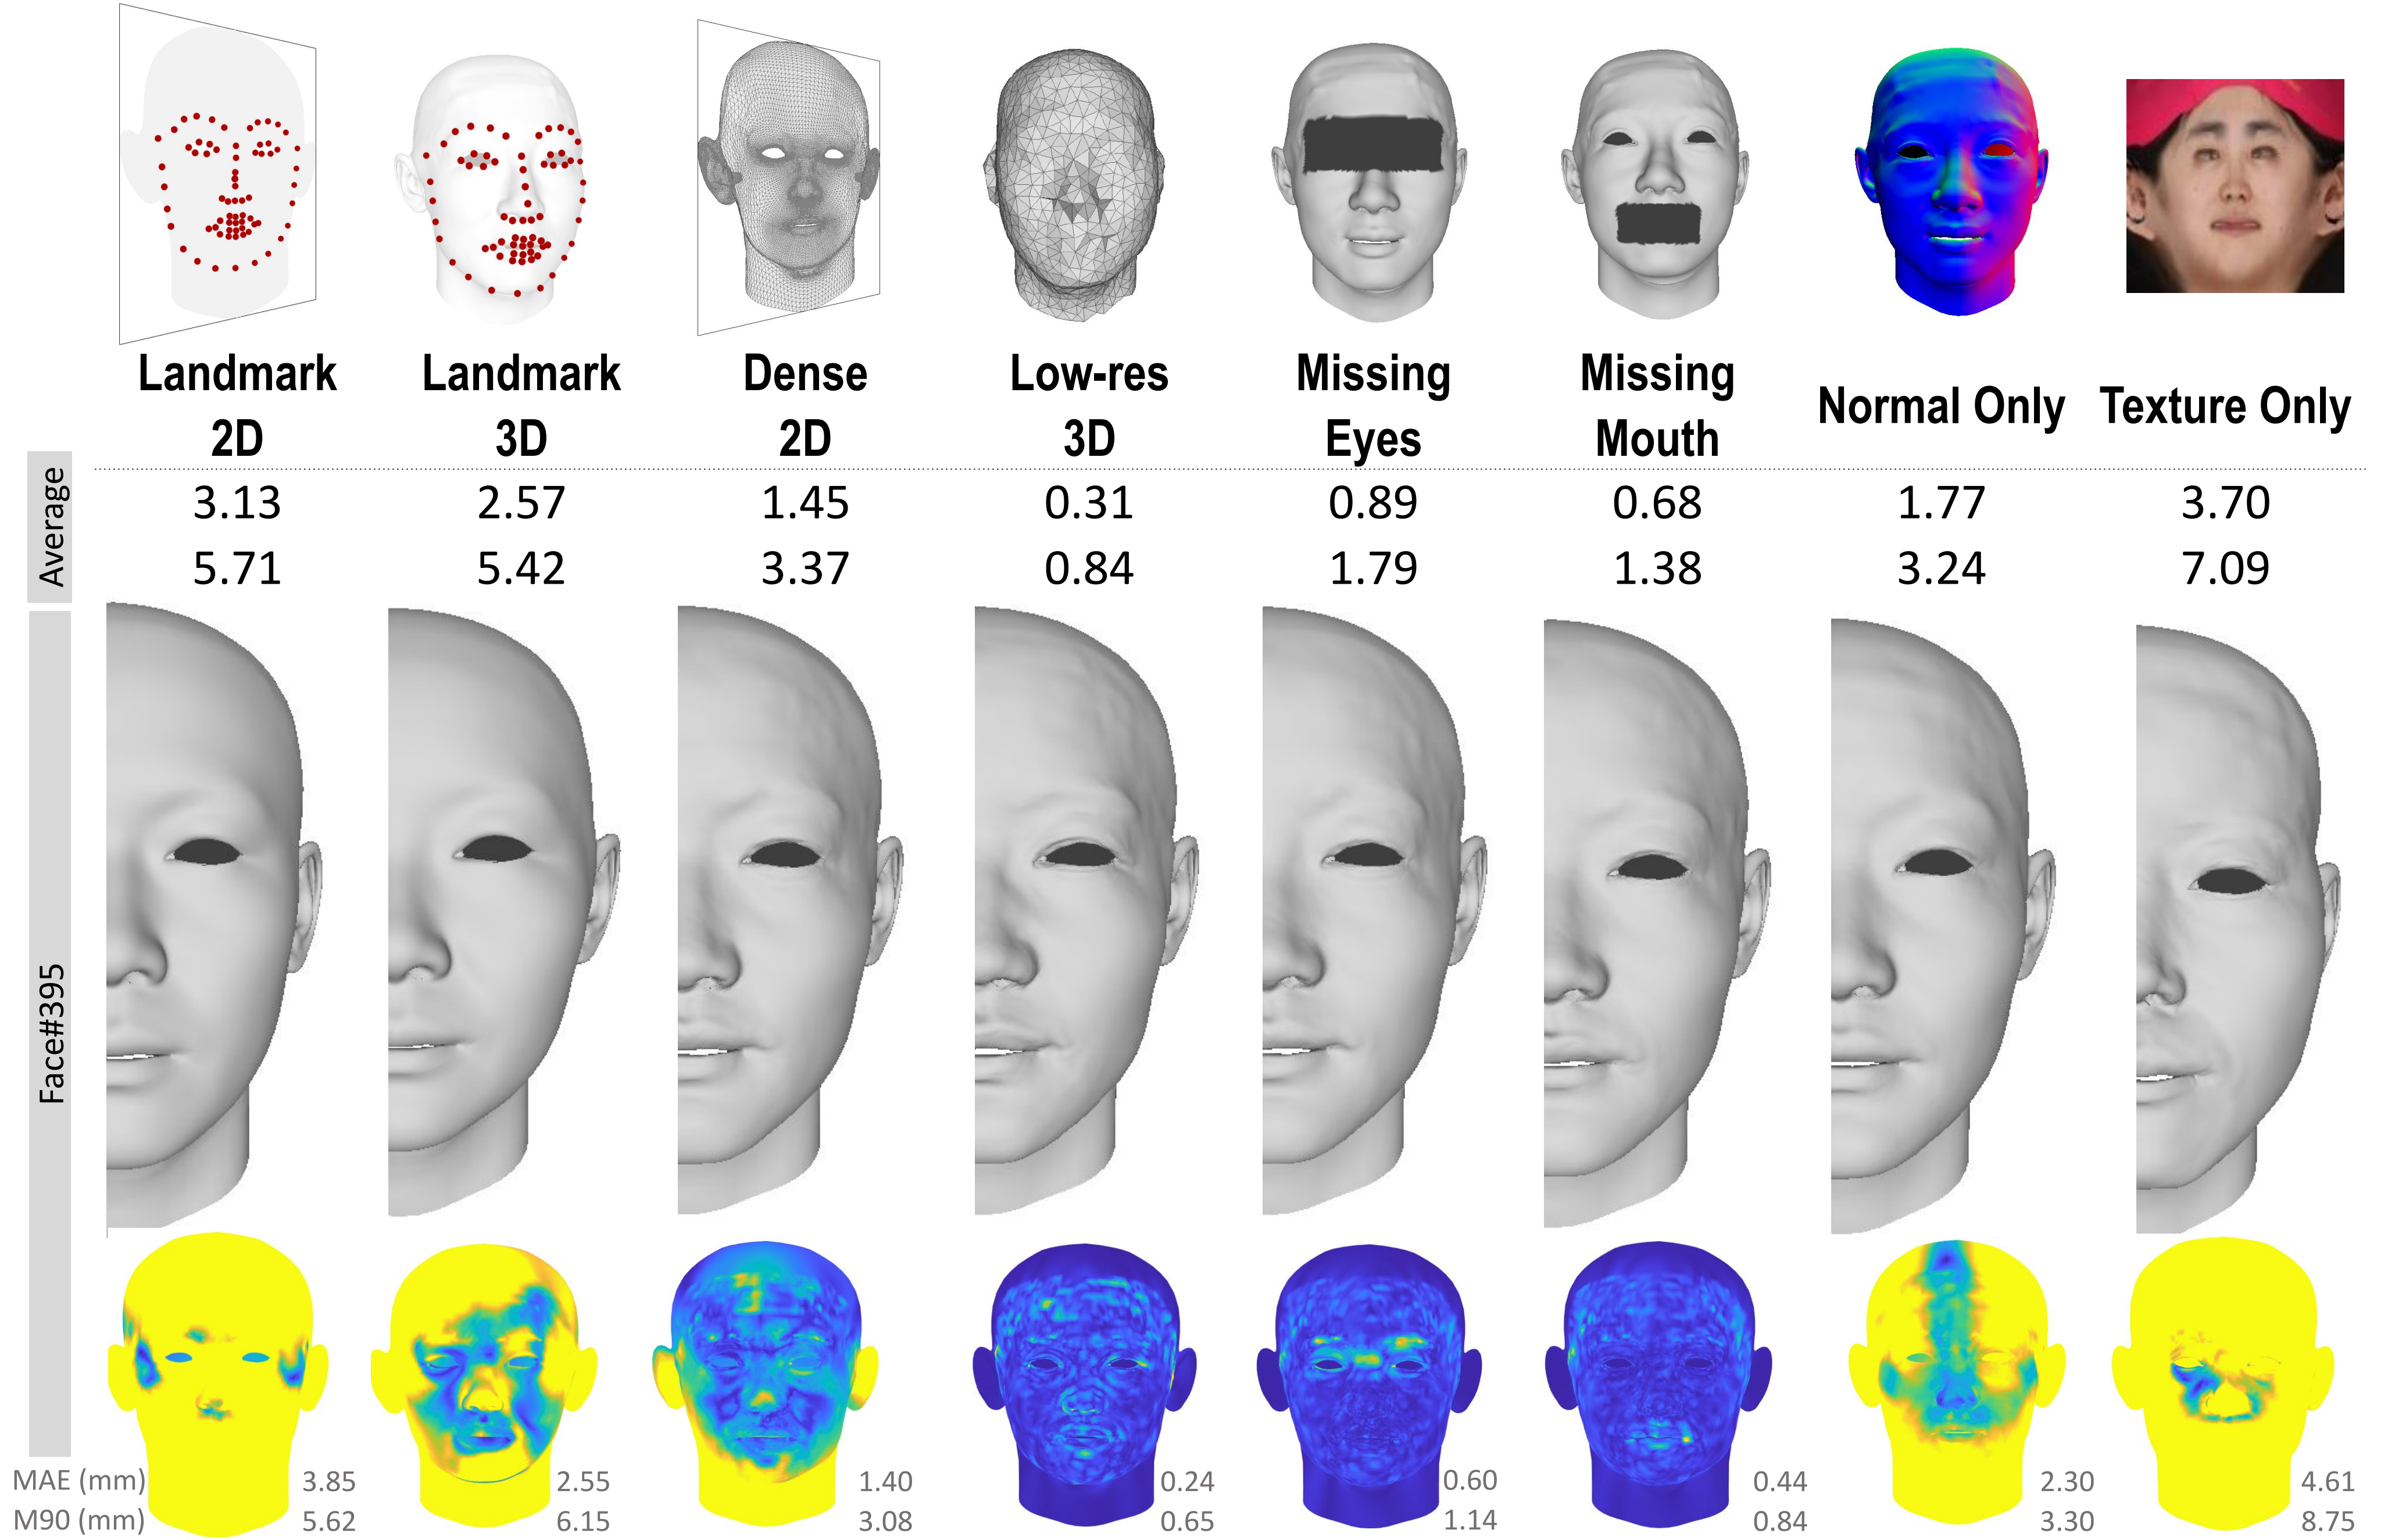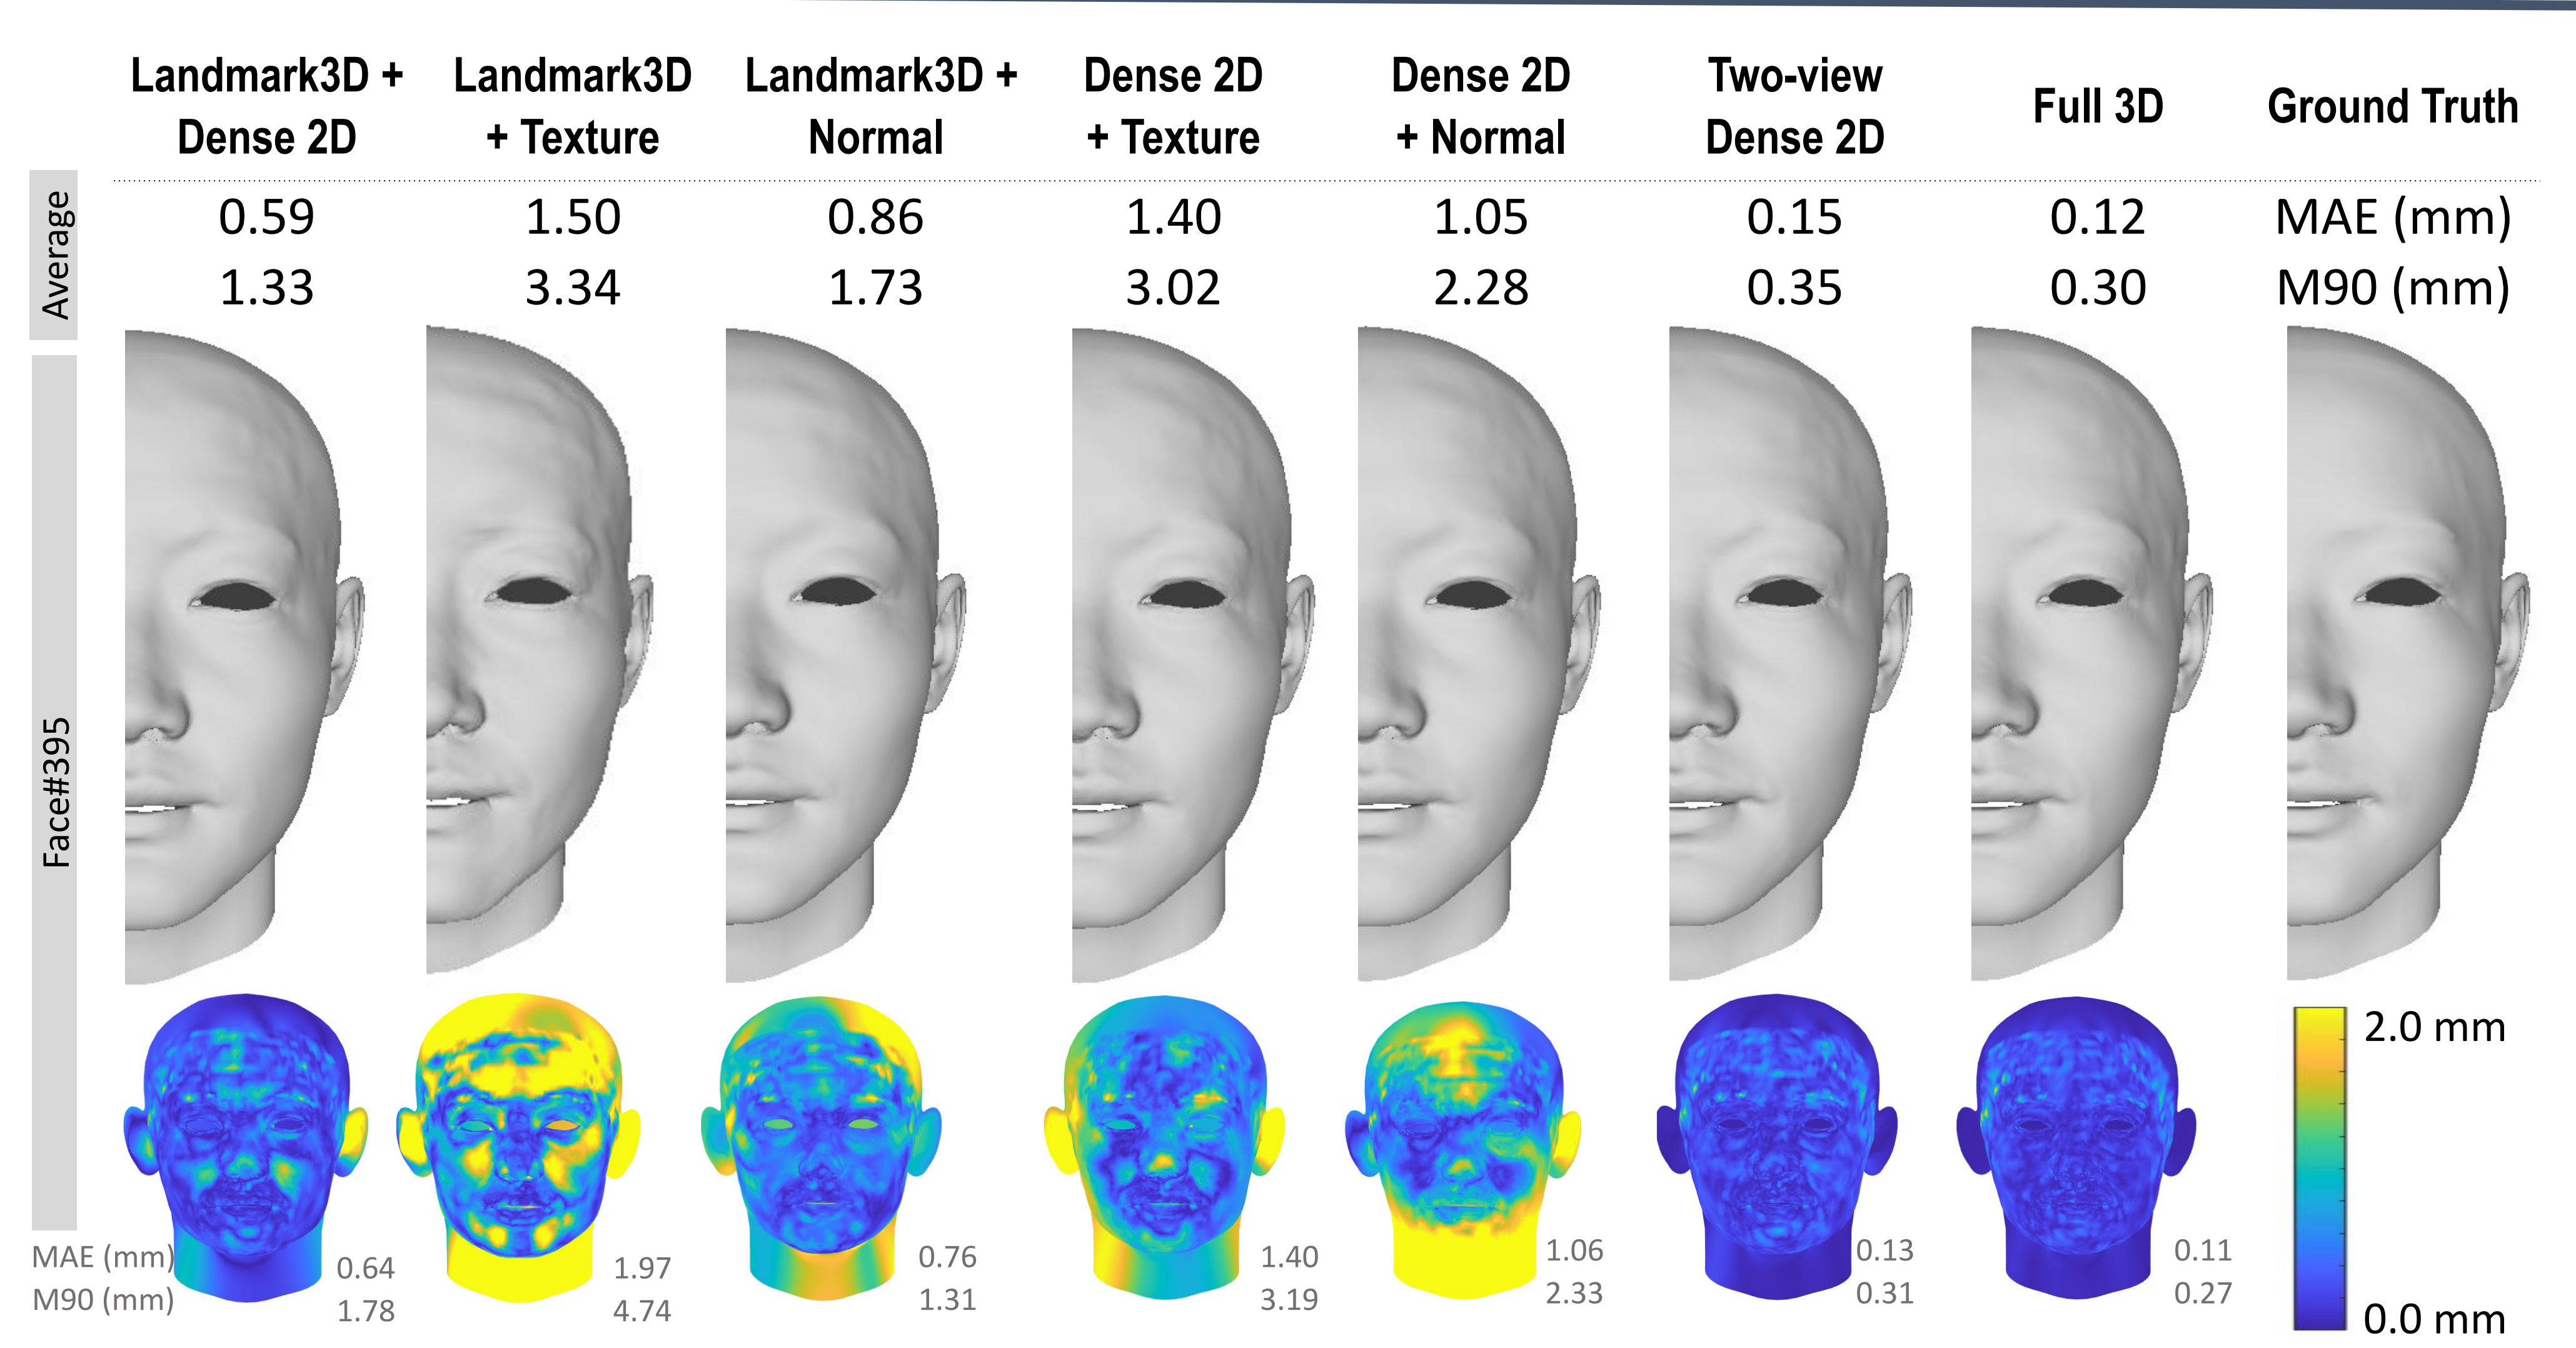



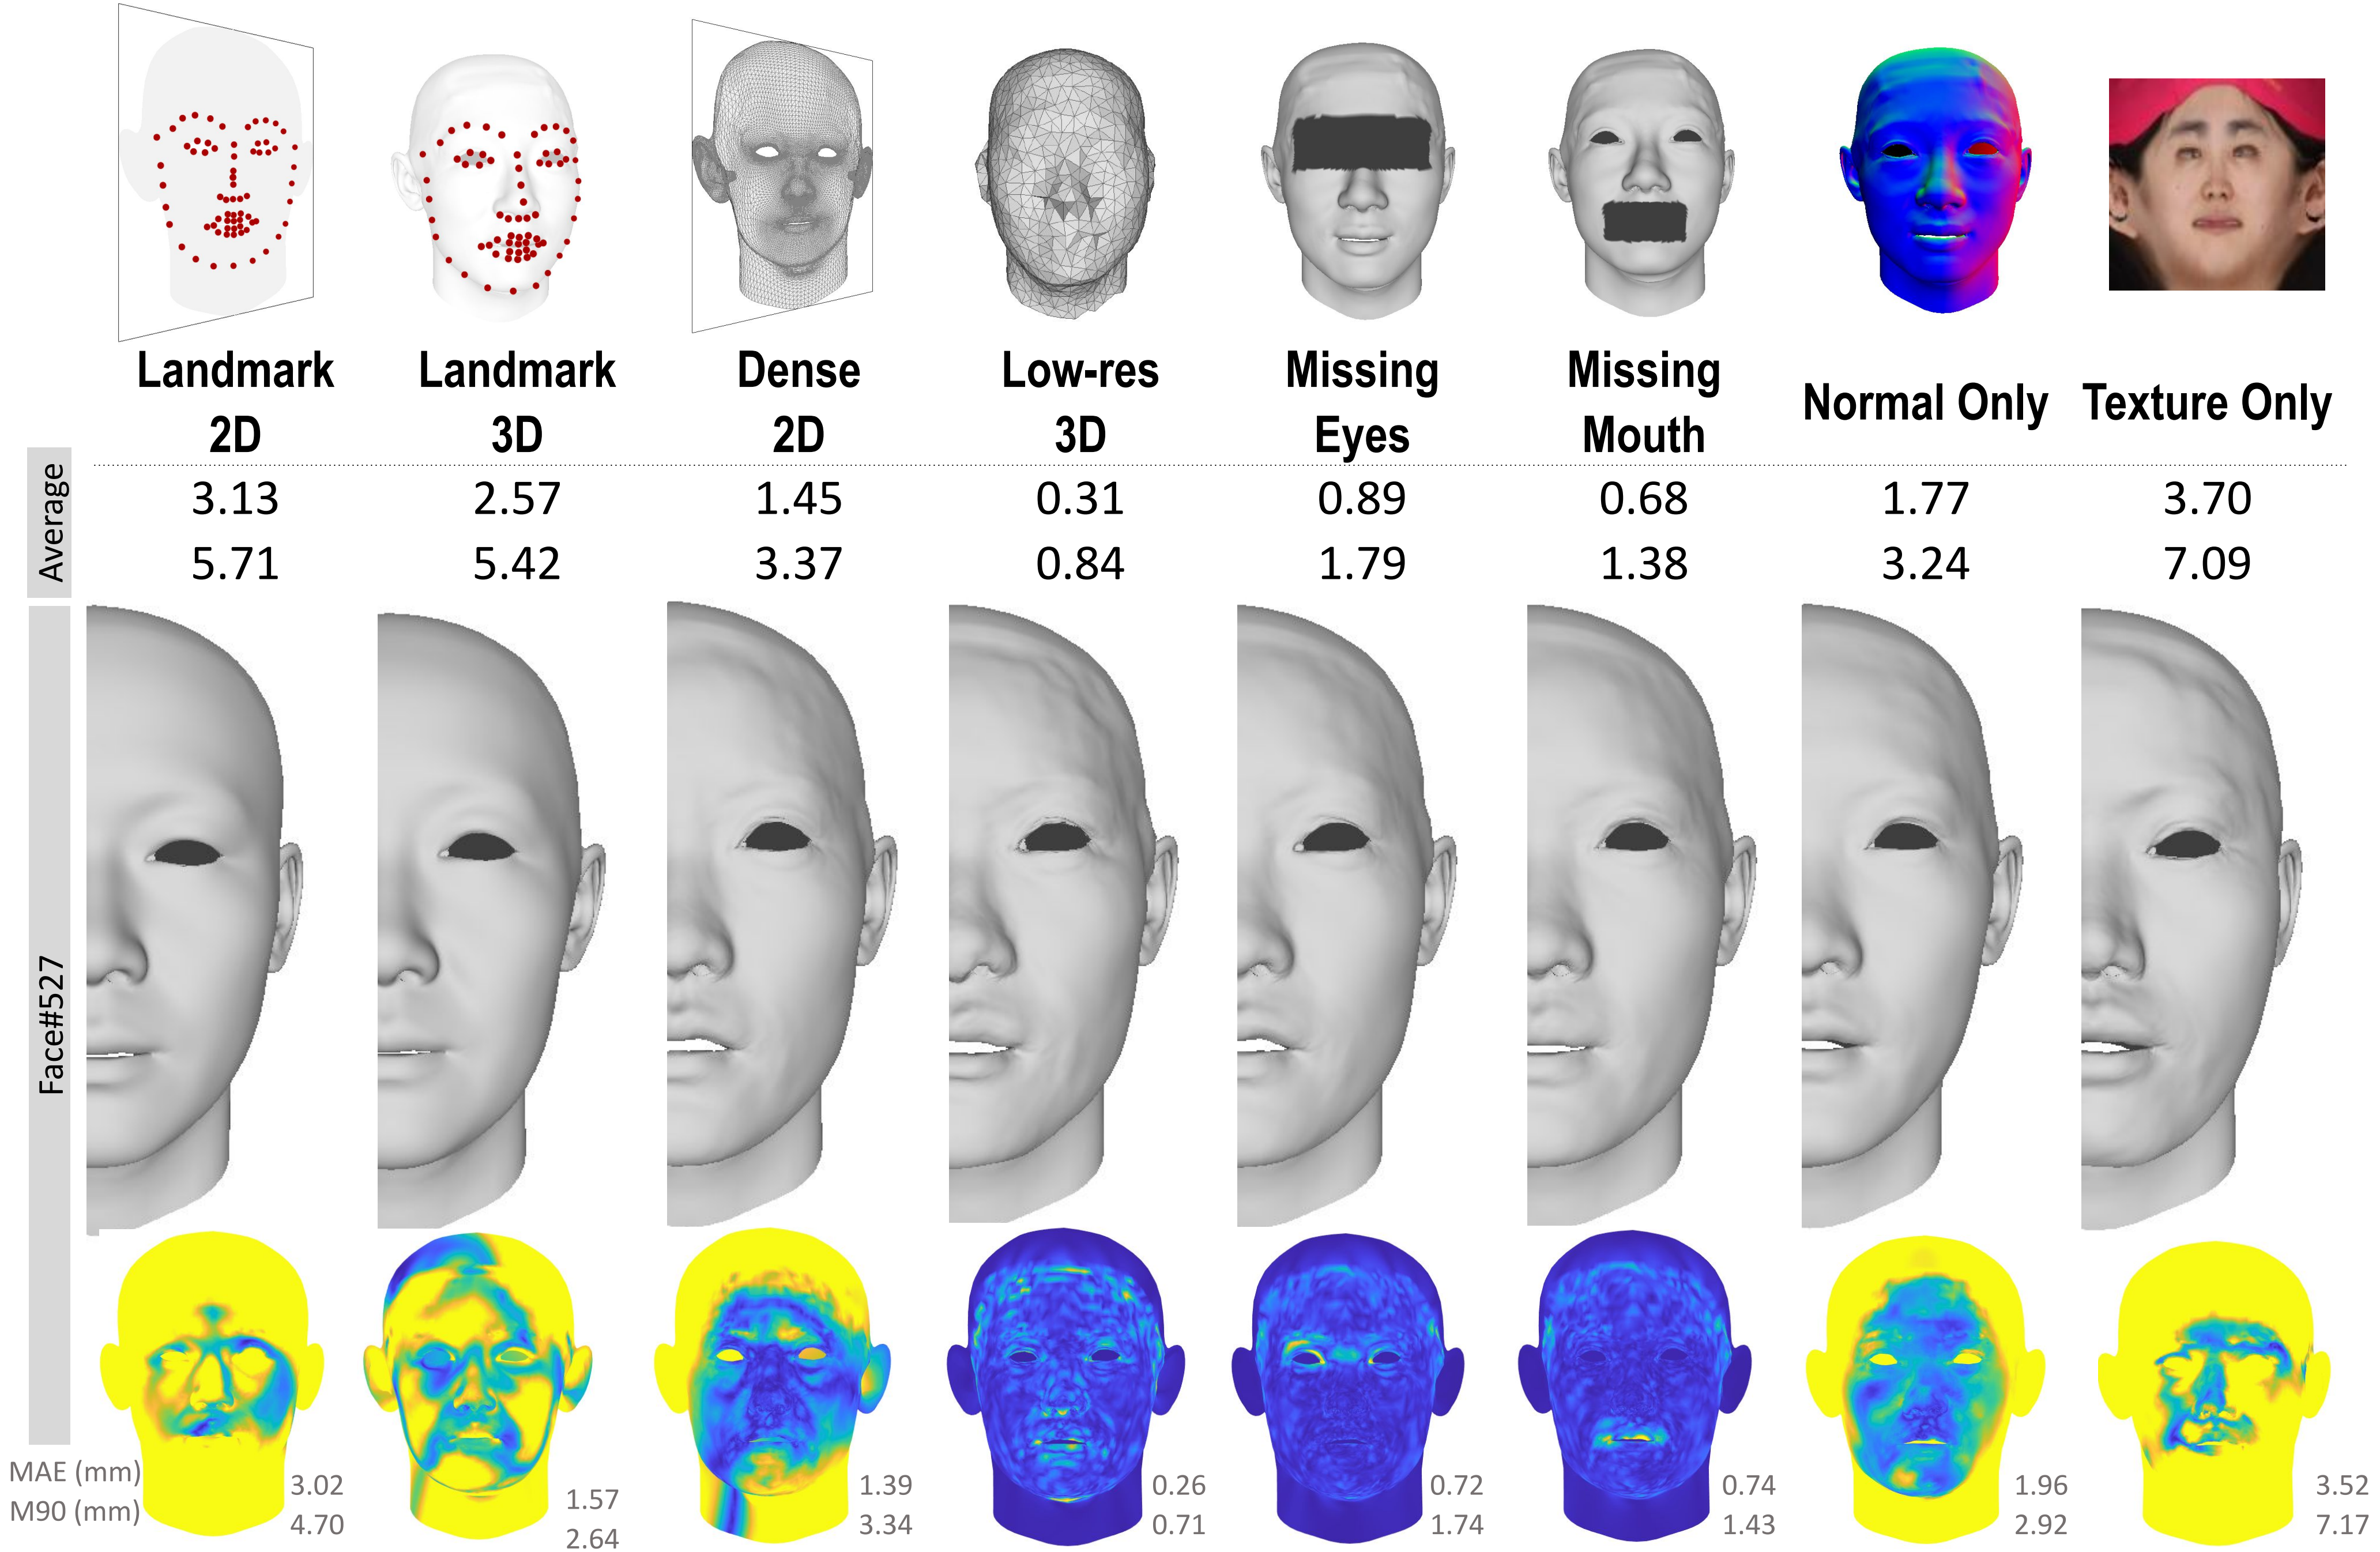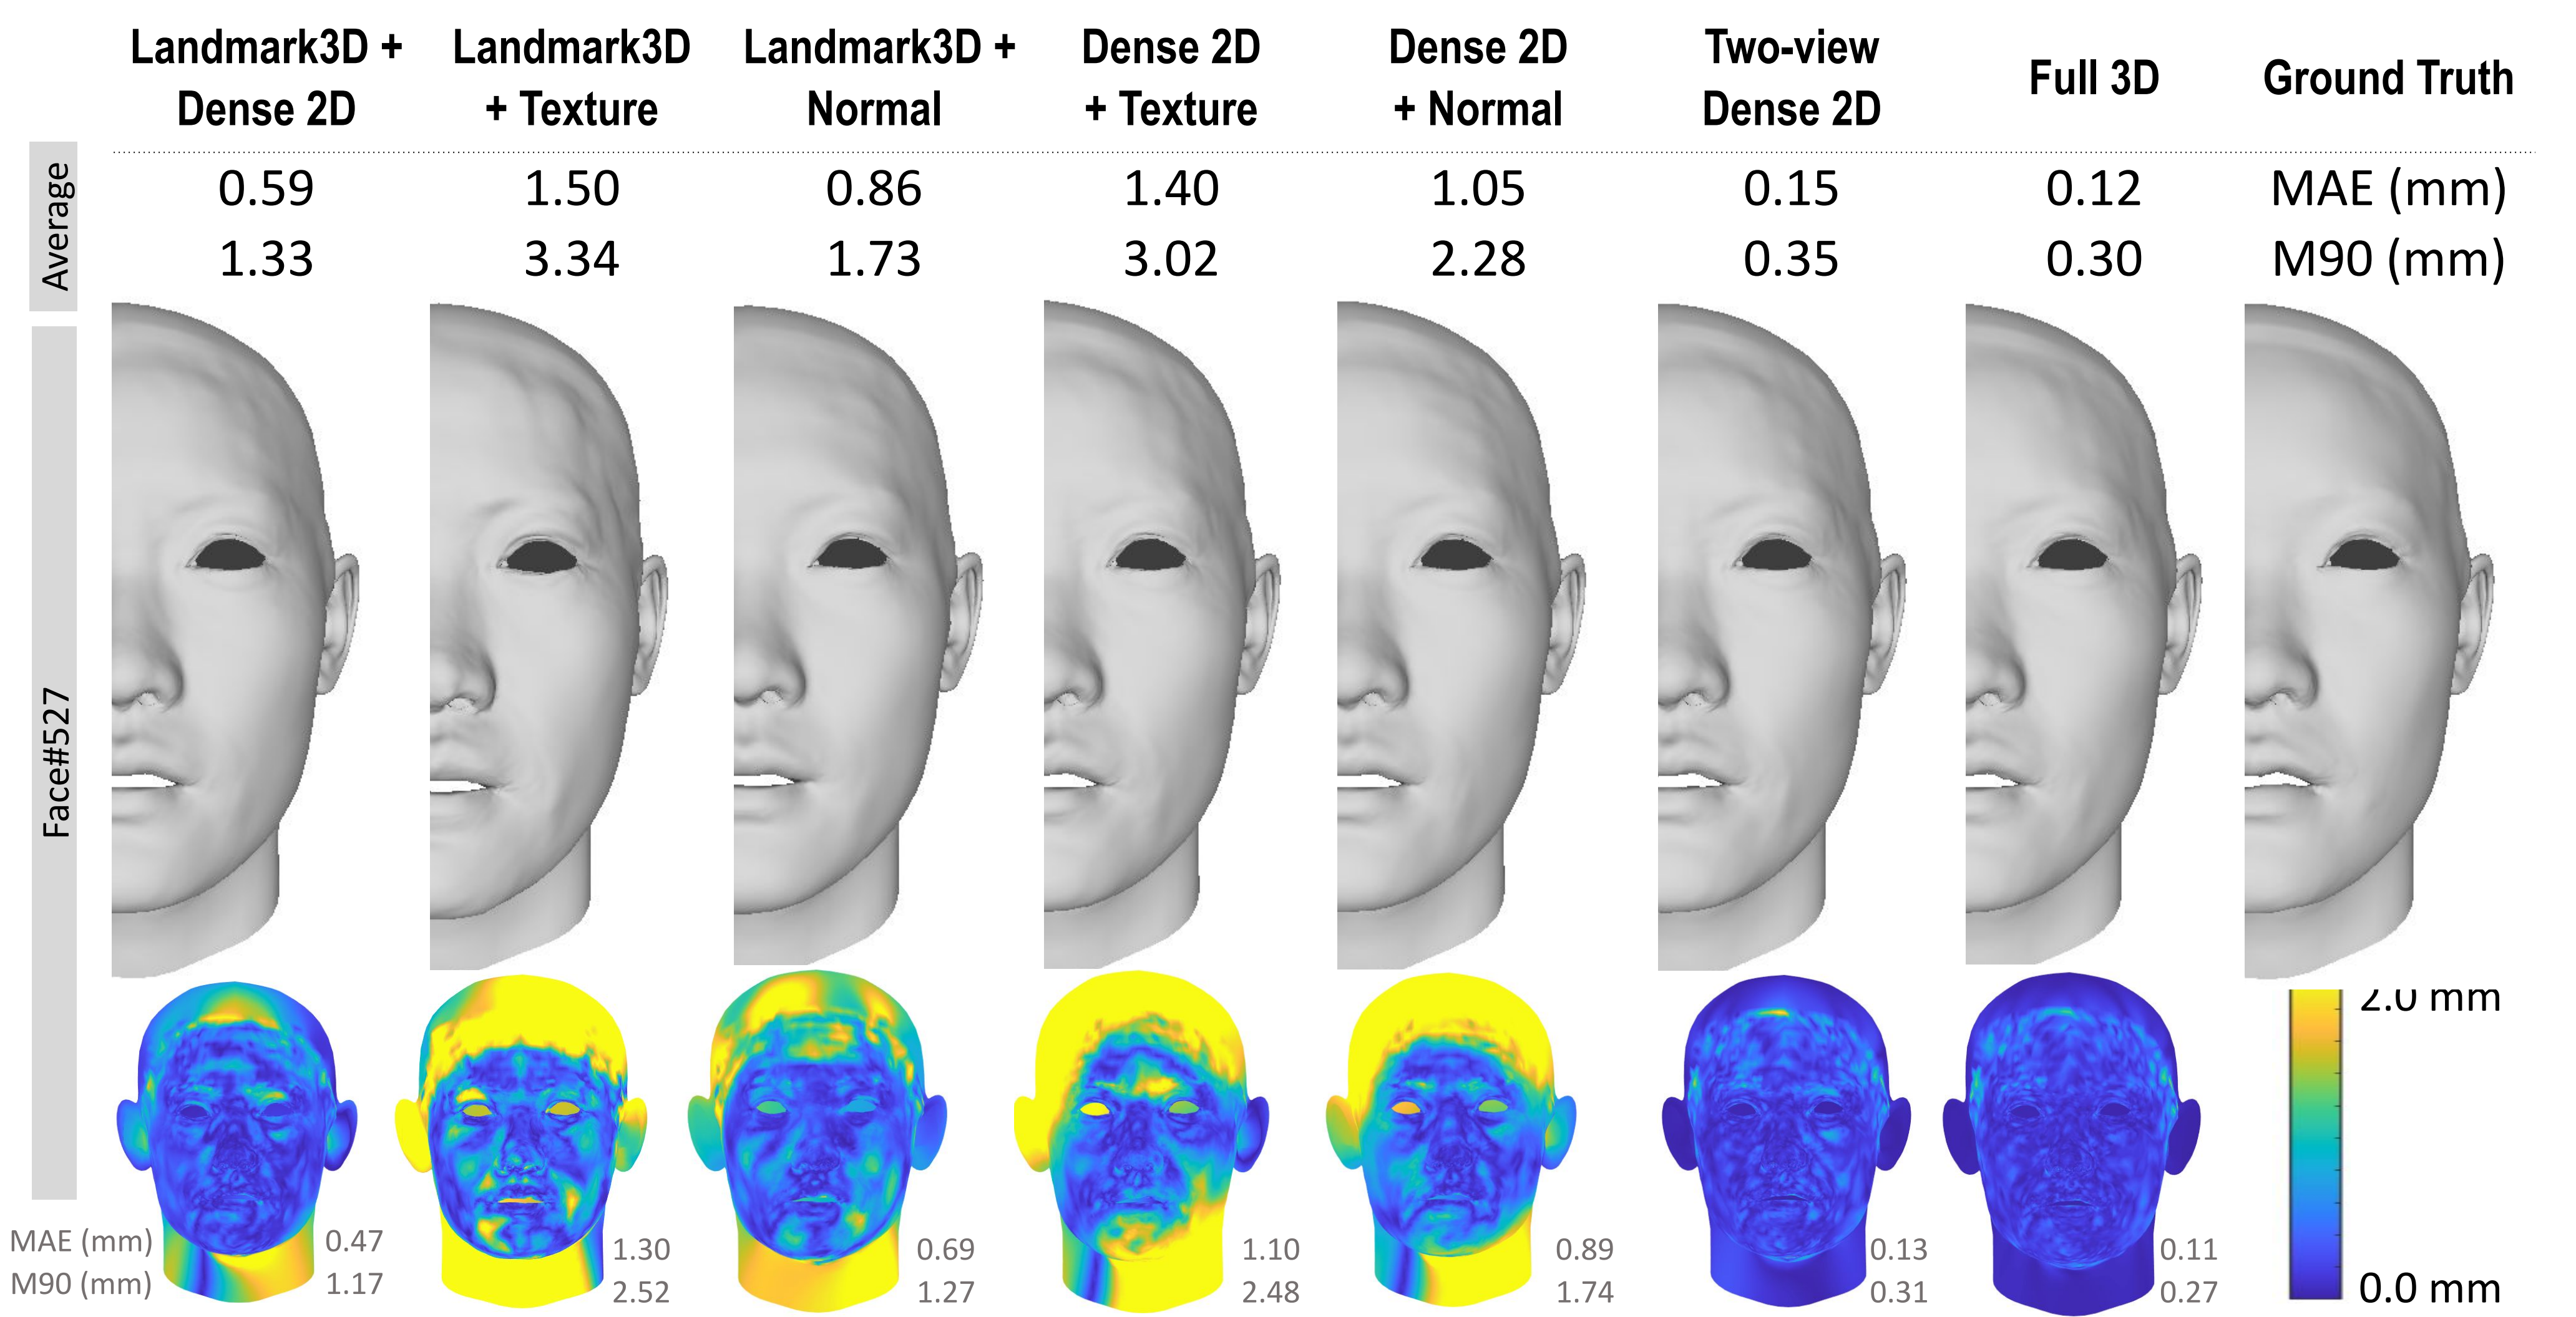



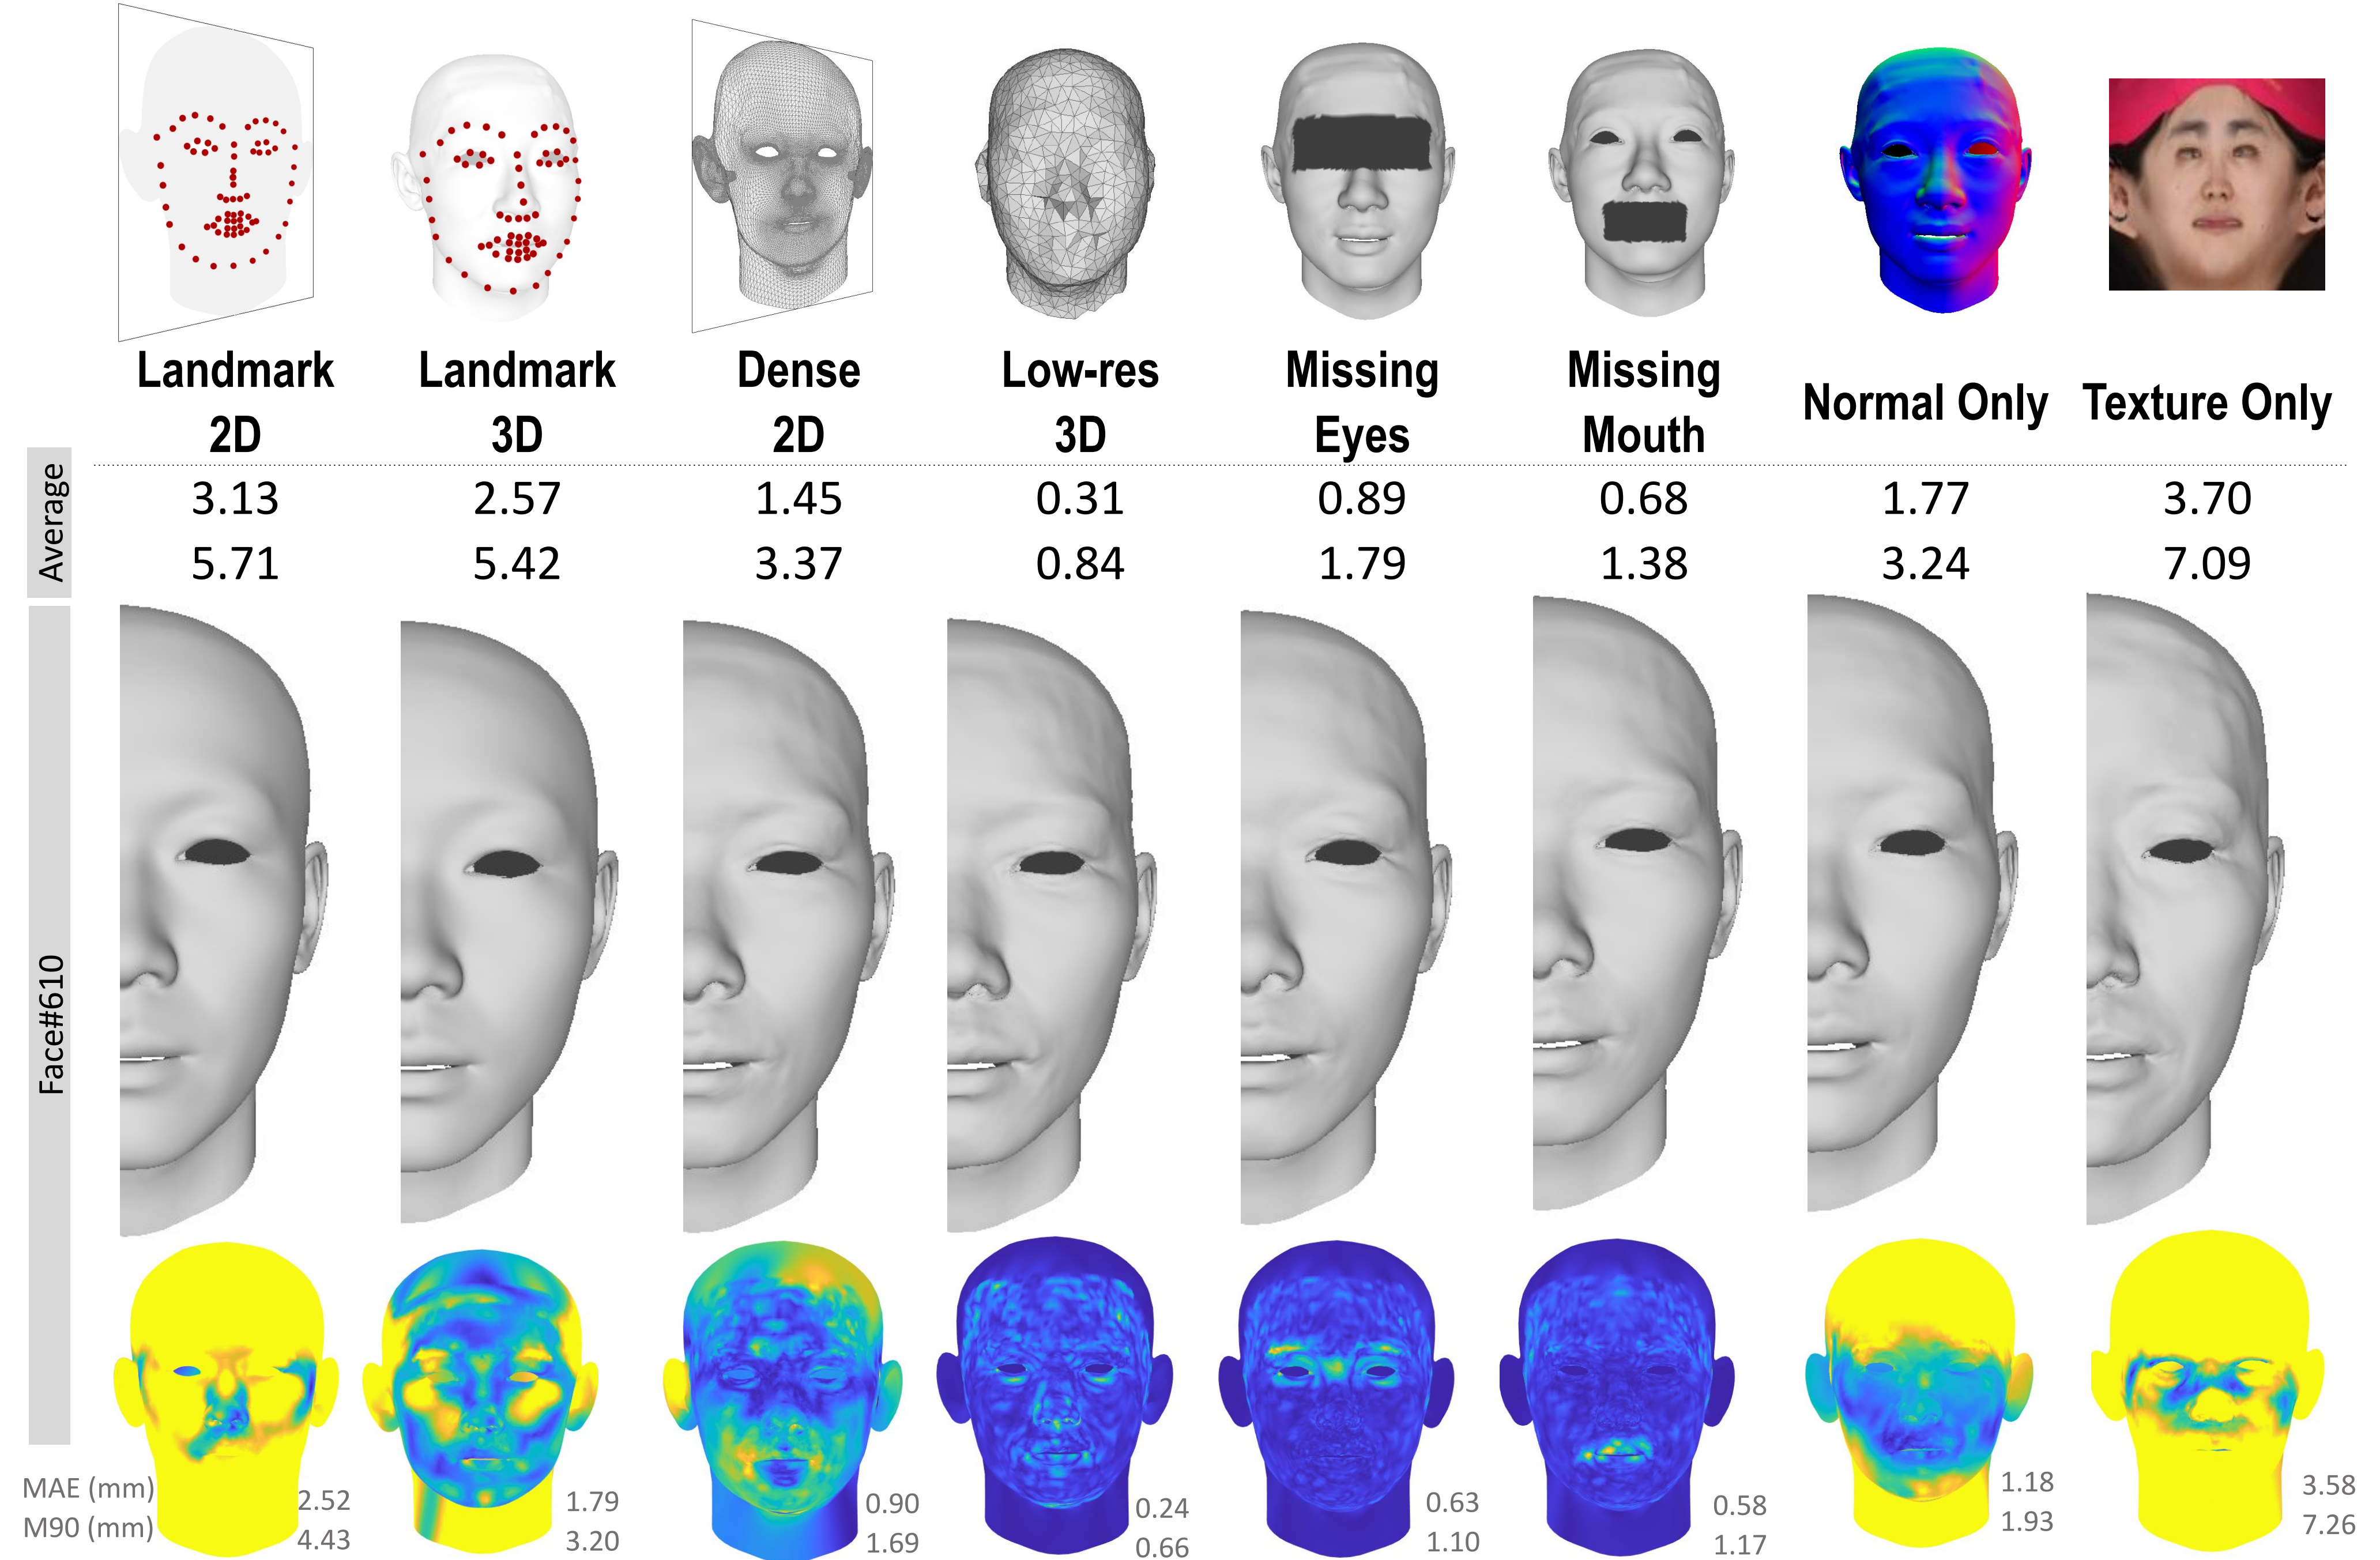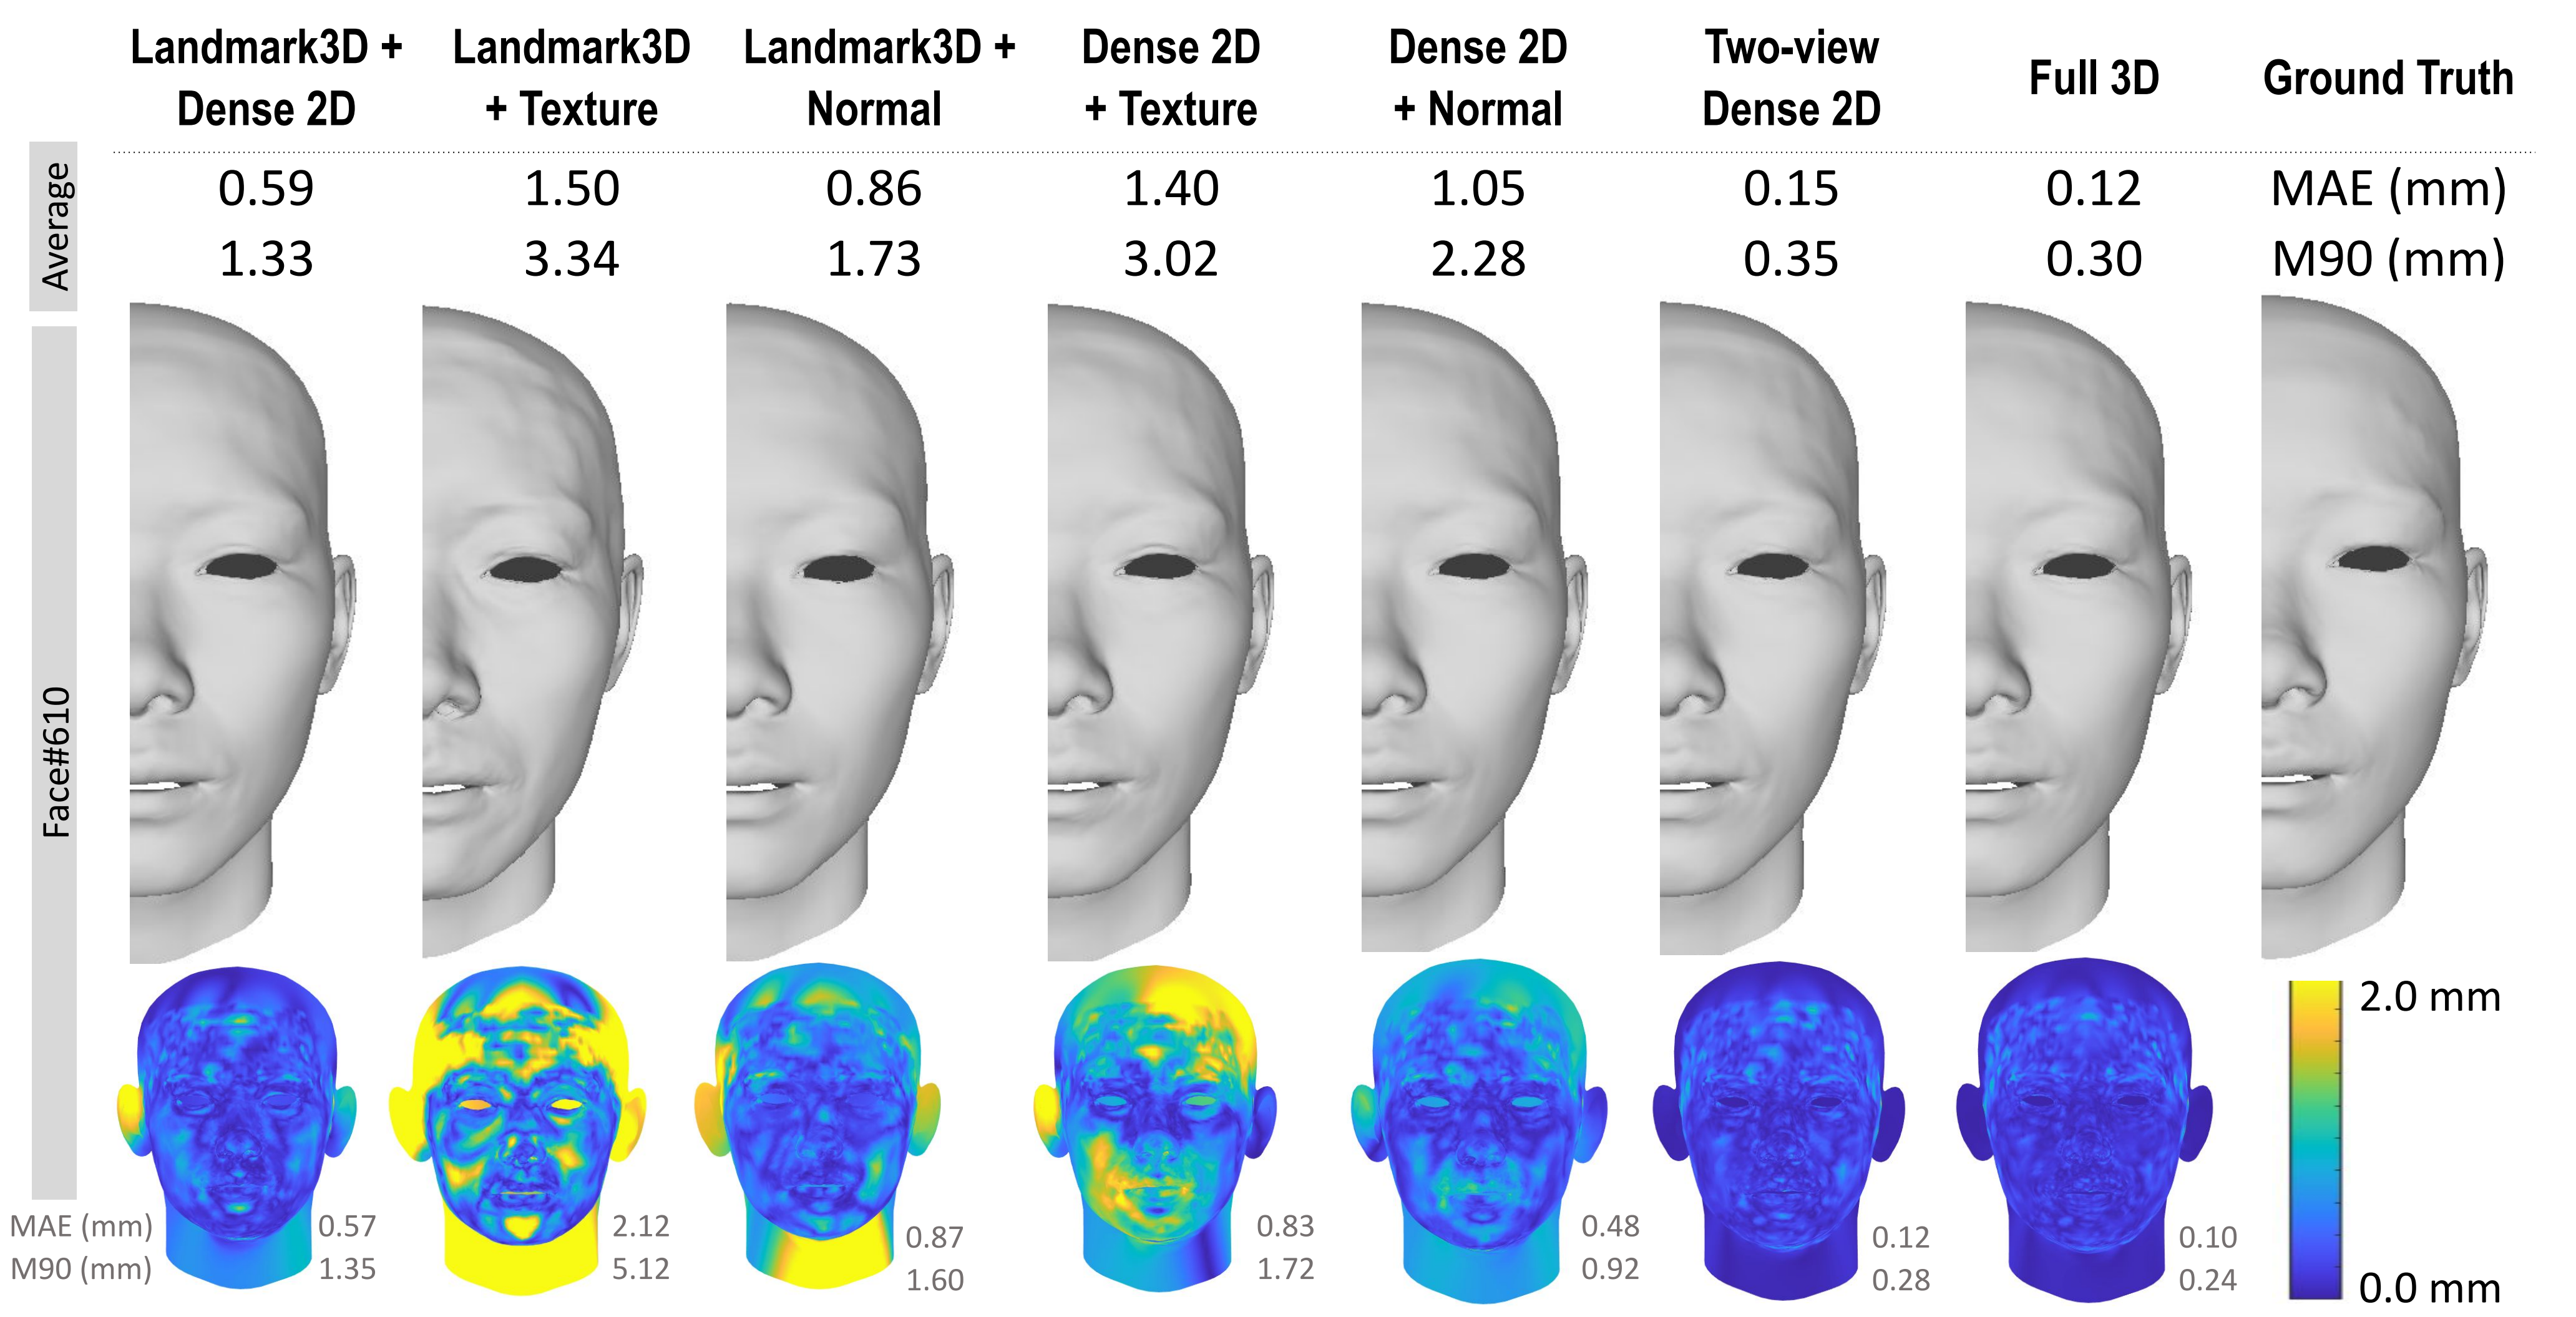



# Part 2

Additional input data types



## Part 2: Additional input data types

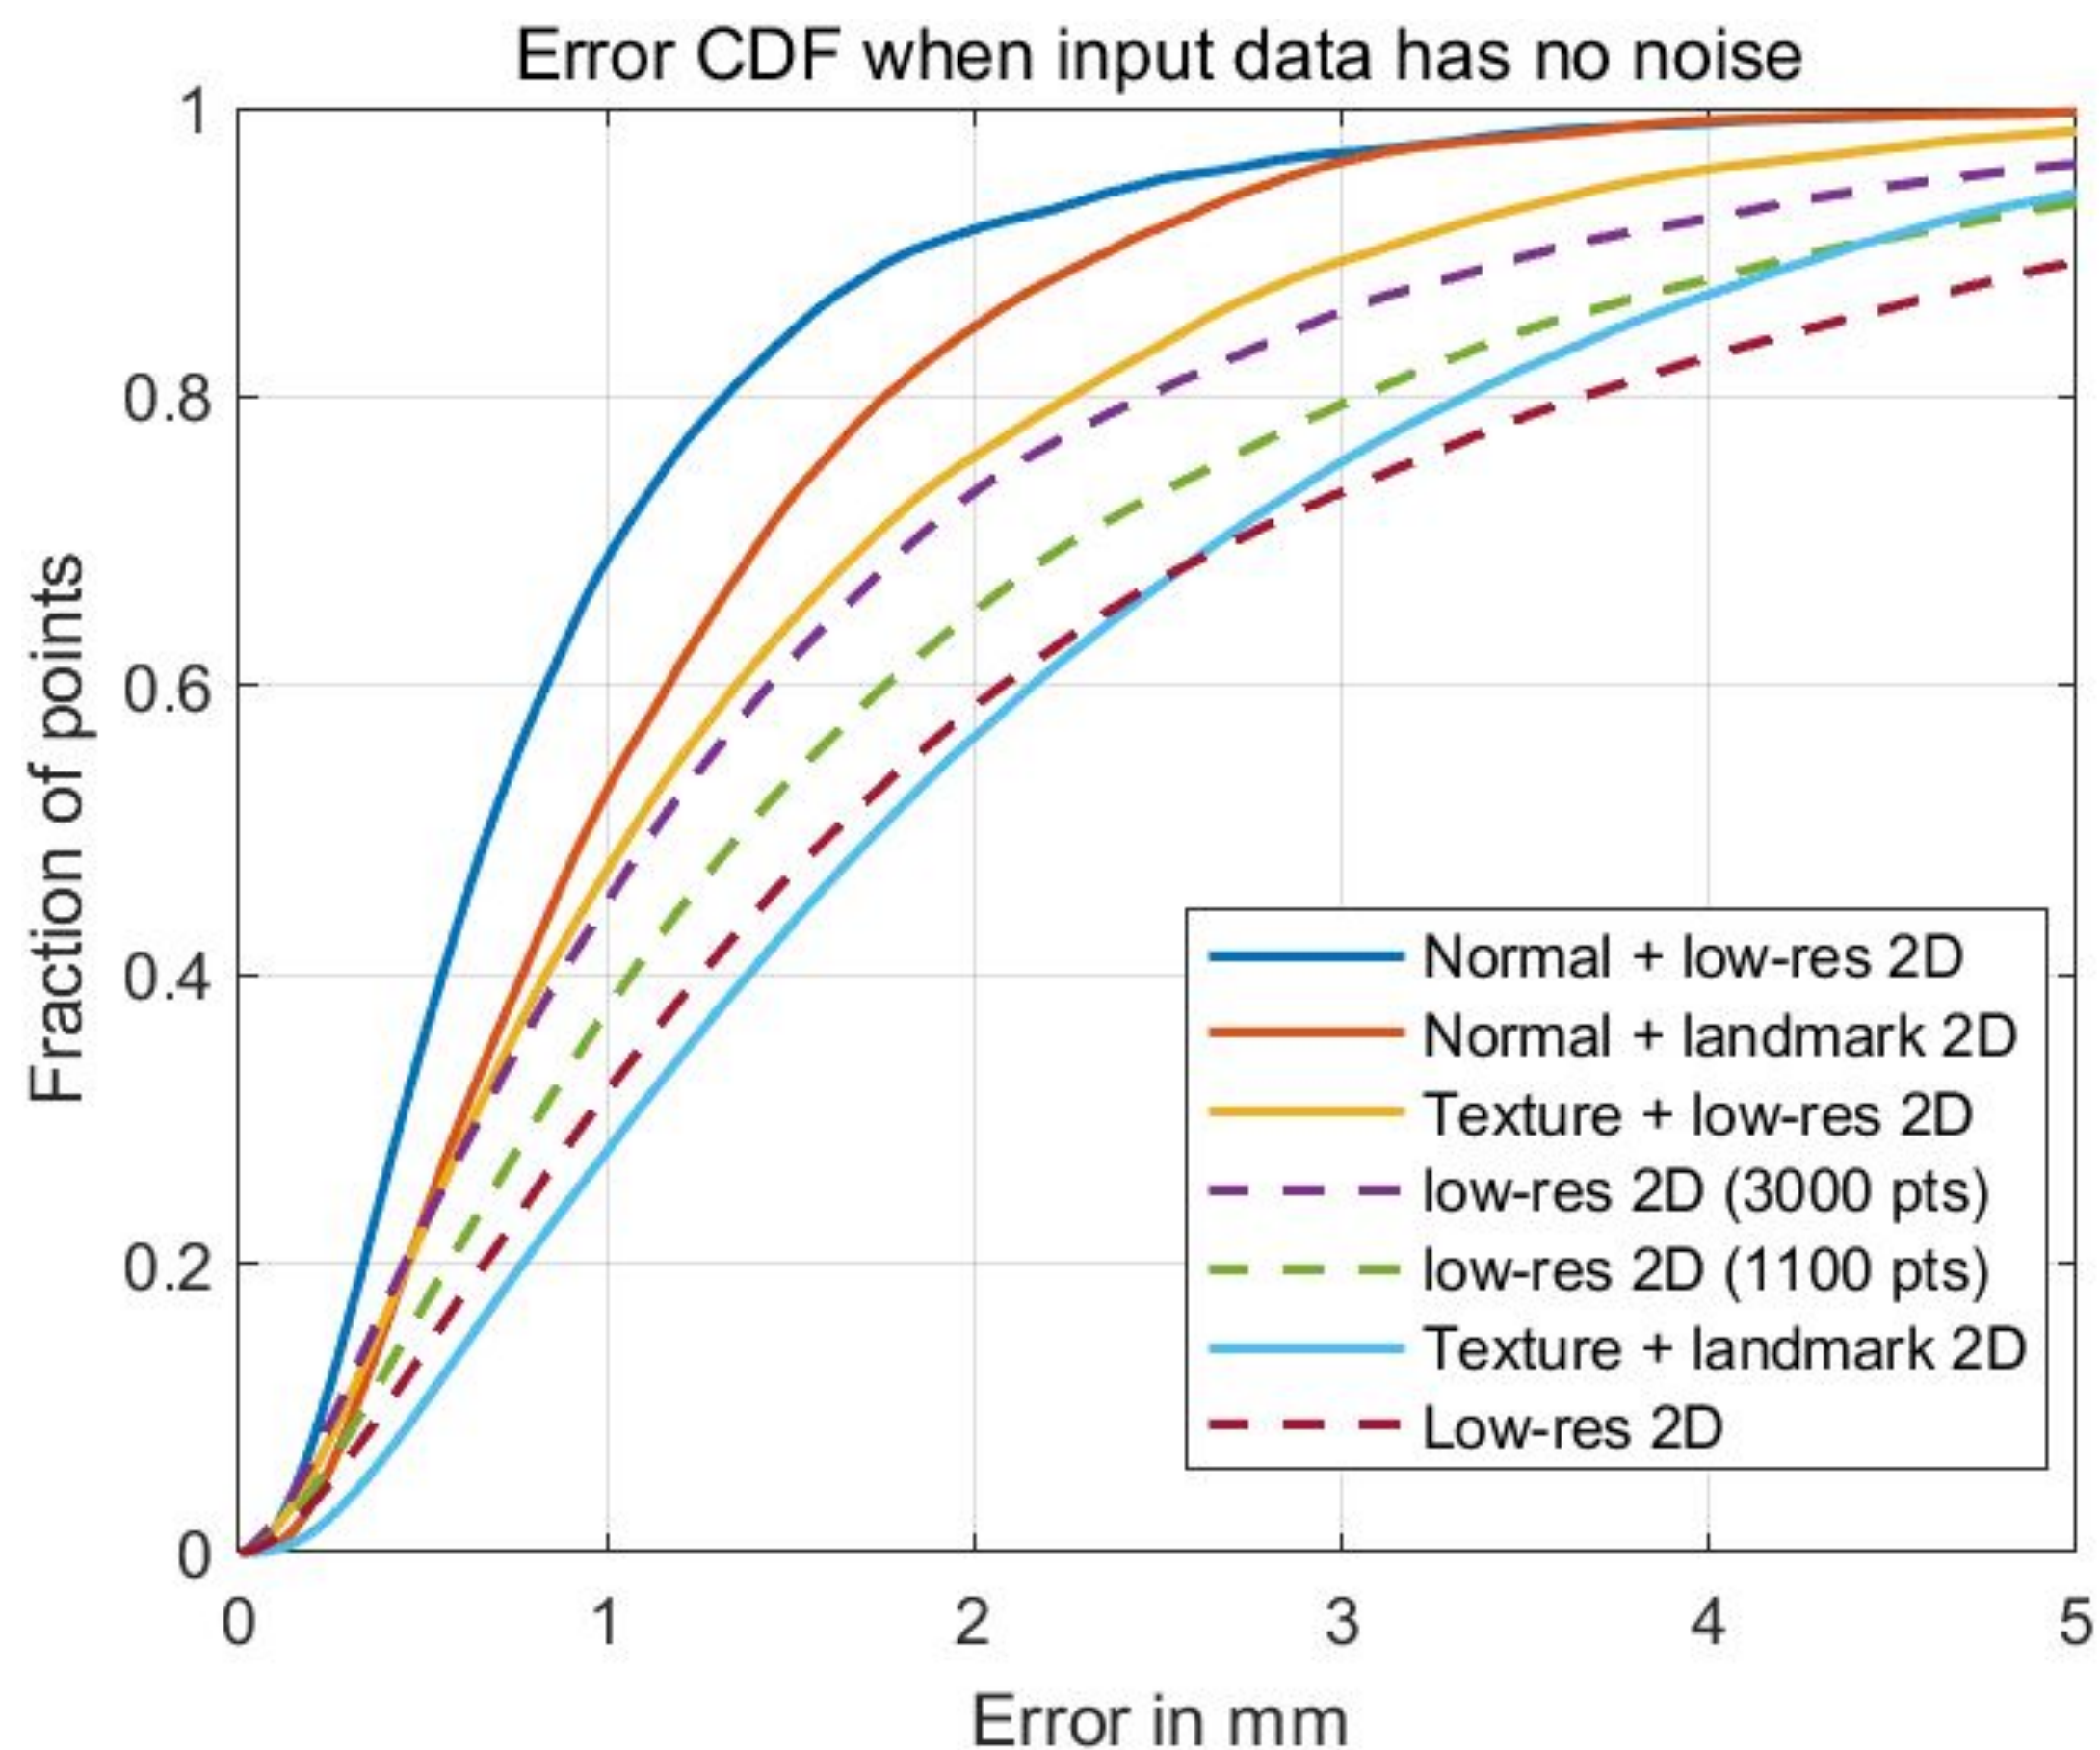

Cumulative error distribution, showing the fraction of reconstructed vertices with error less than a given threshold. This plot contains extra input data types not shown in Figure 2. Note that the 'low-res 2D' data type has 800 2D points, while 'low-res 2D (1100 pts)' and 'low-res 2D (3000 pts)' have correspondingly 1100 and 3000 points. These are similar to 'Dense2D', just with many fewer points, analogous to the LowRes3D datatype's reduction from Full3D.

As discussed in the main paper, combinations do better than single 2D datatypes, so it is important to use all the information. These options all have max error (M90) above 2mm, consistent with the combinations reported in the main paper.



# Part 3

More noise examples like figure 3



# Part 3: More noise distributions and magnitudes

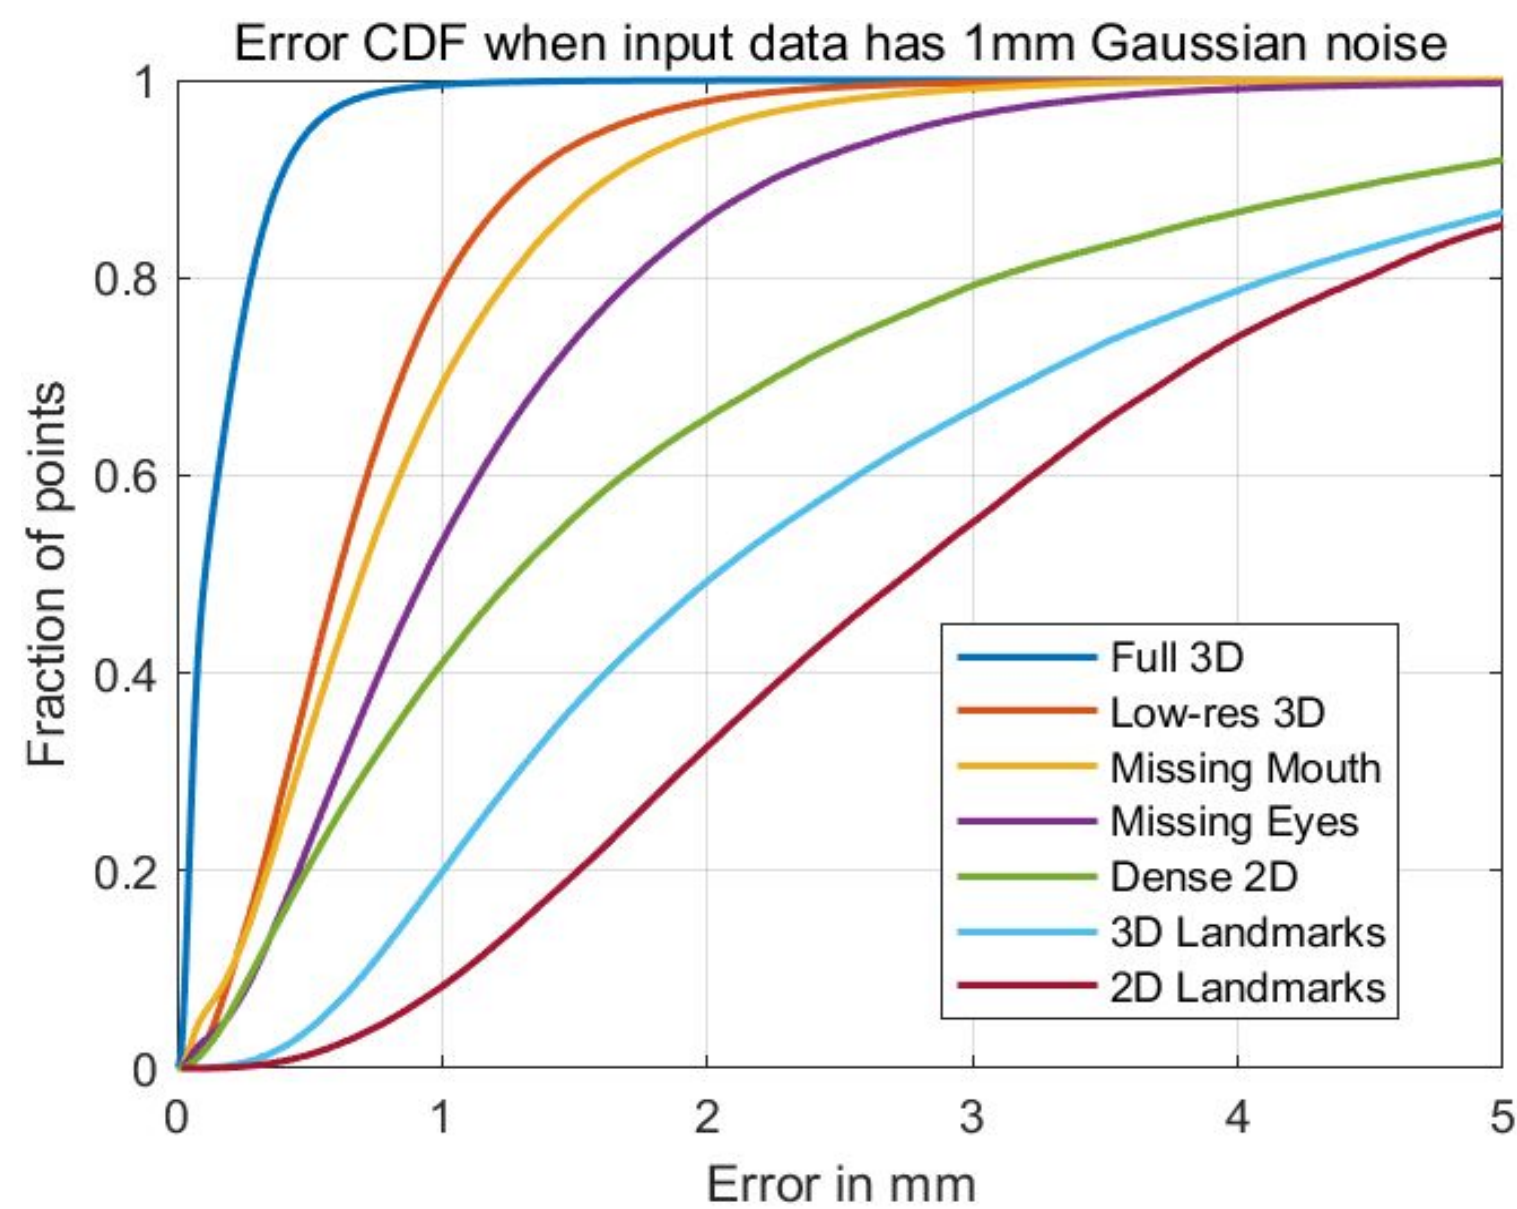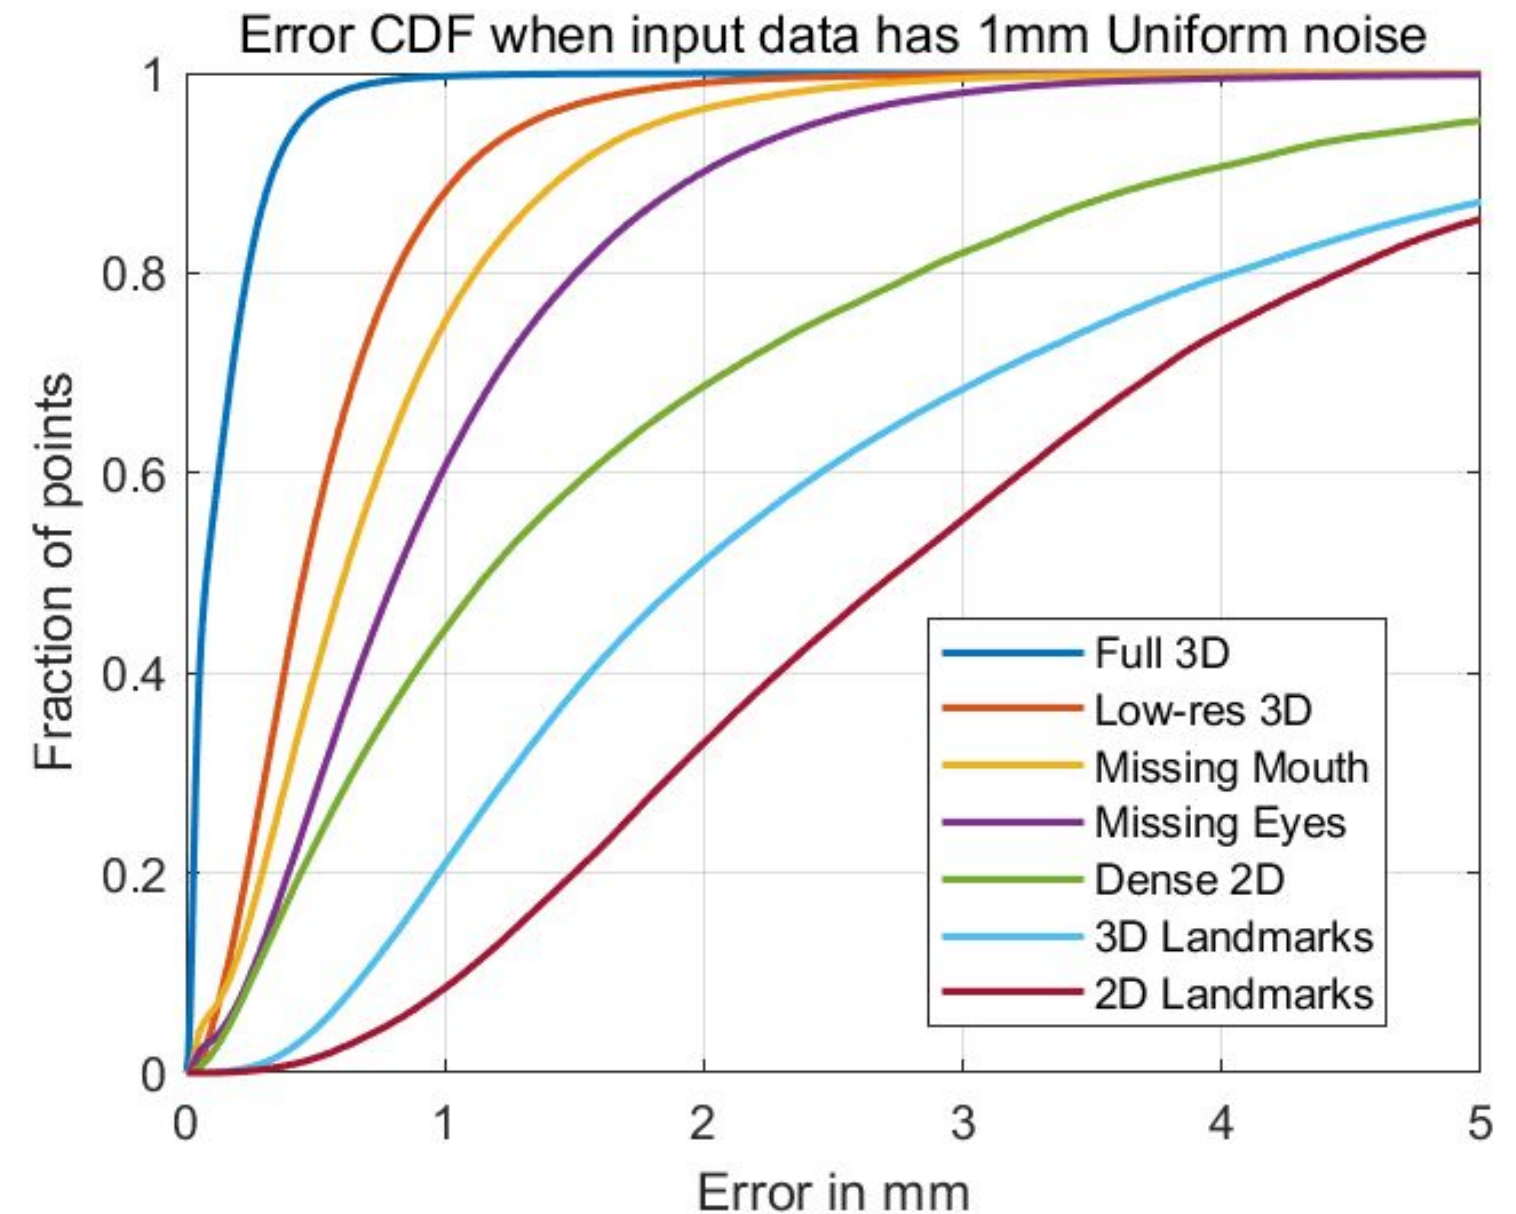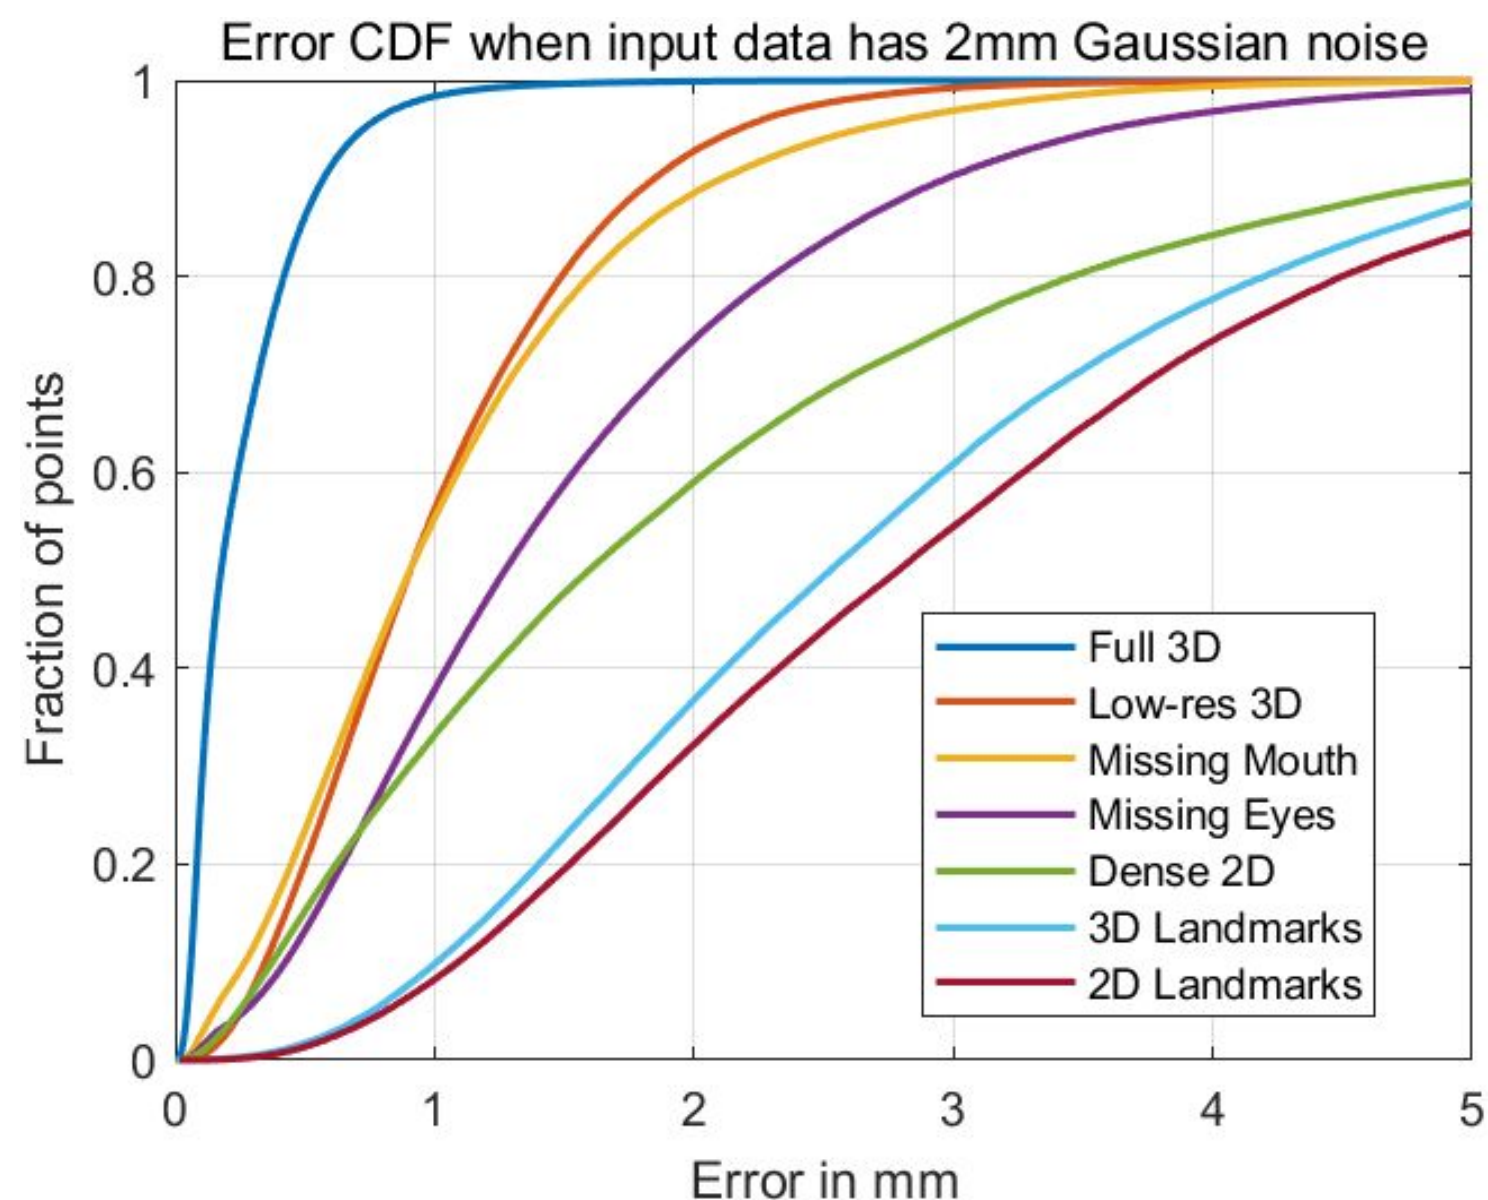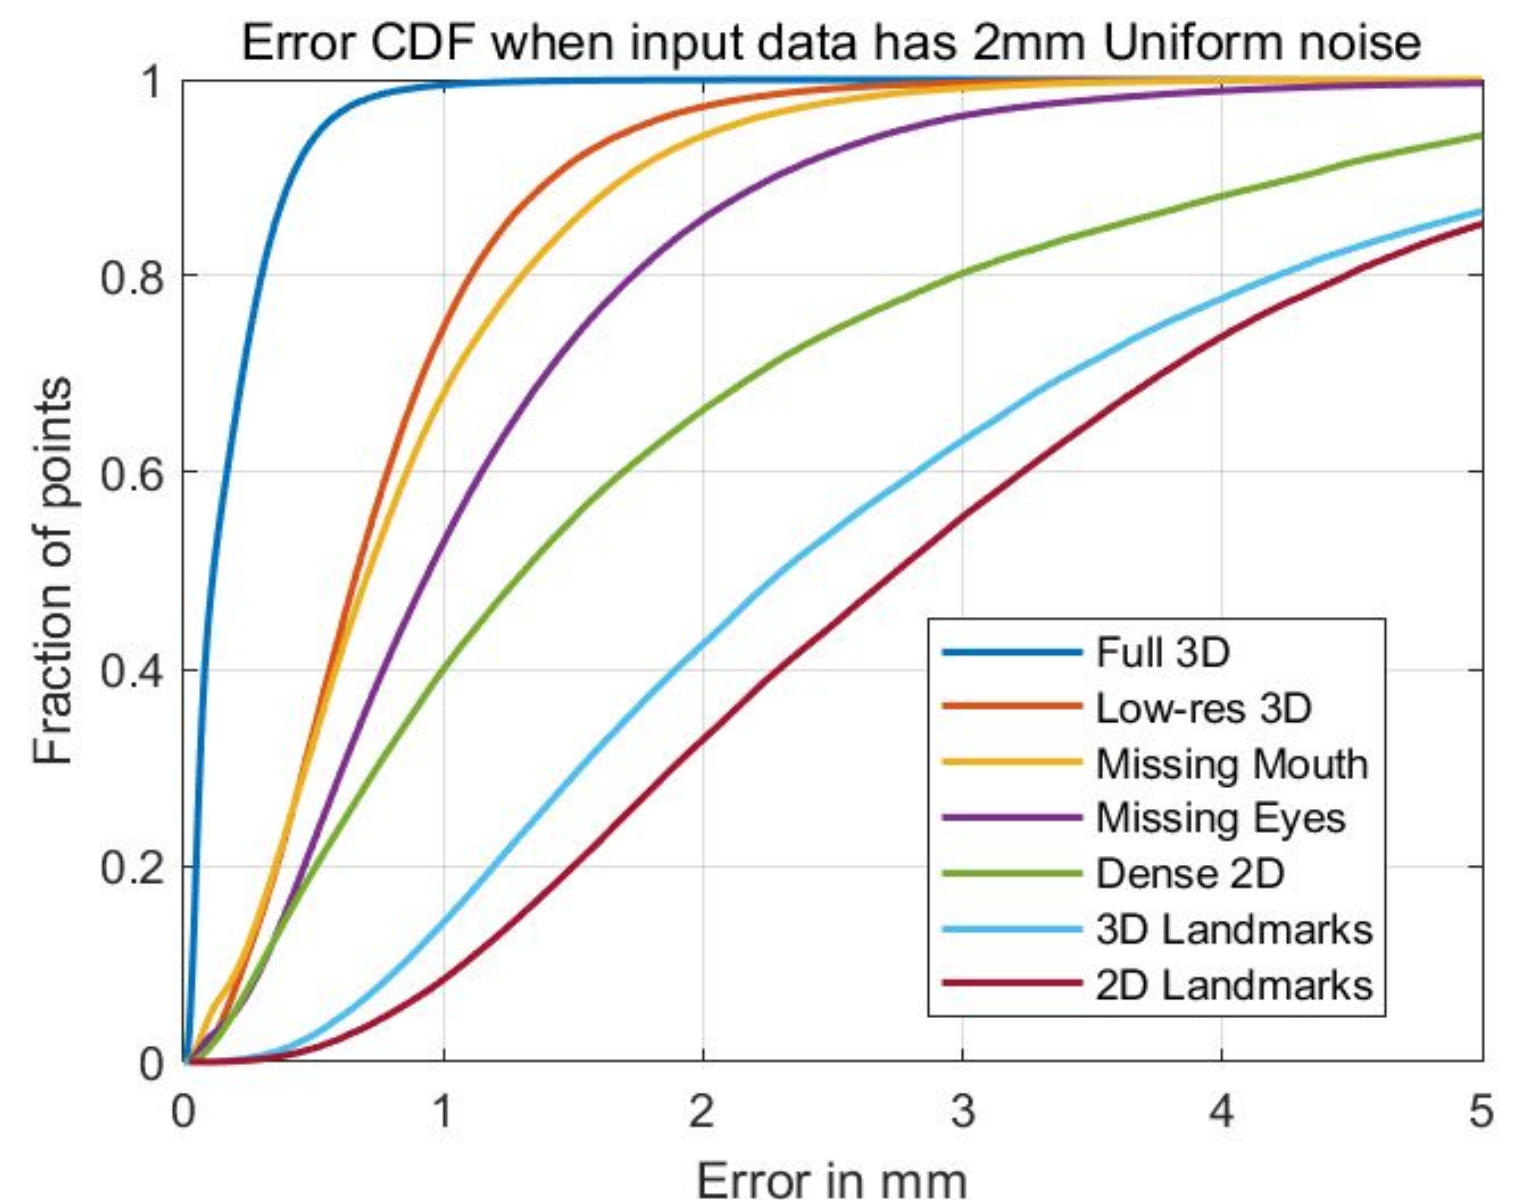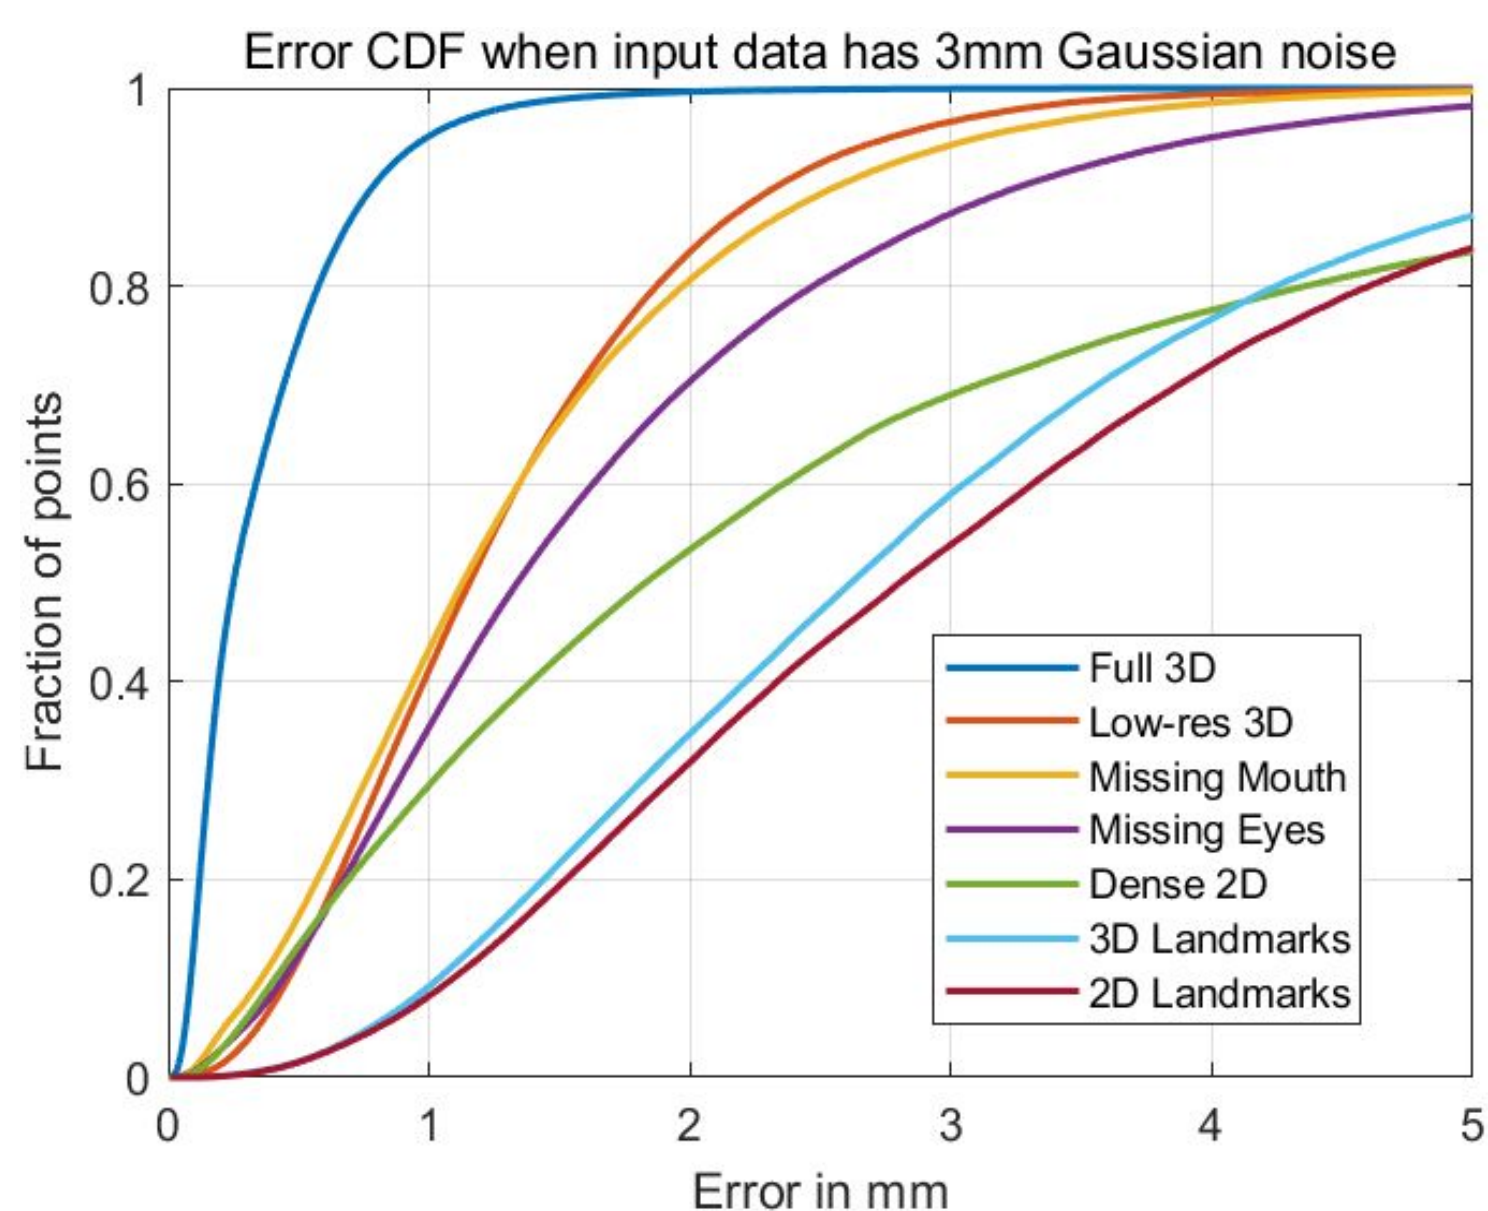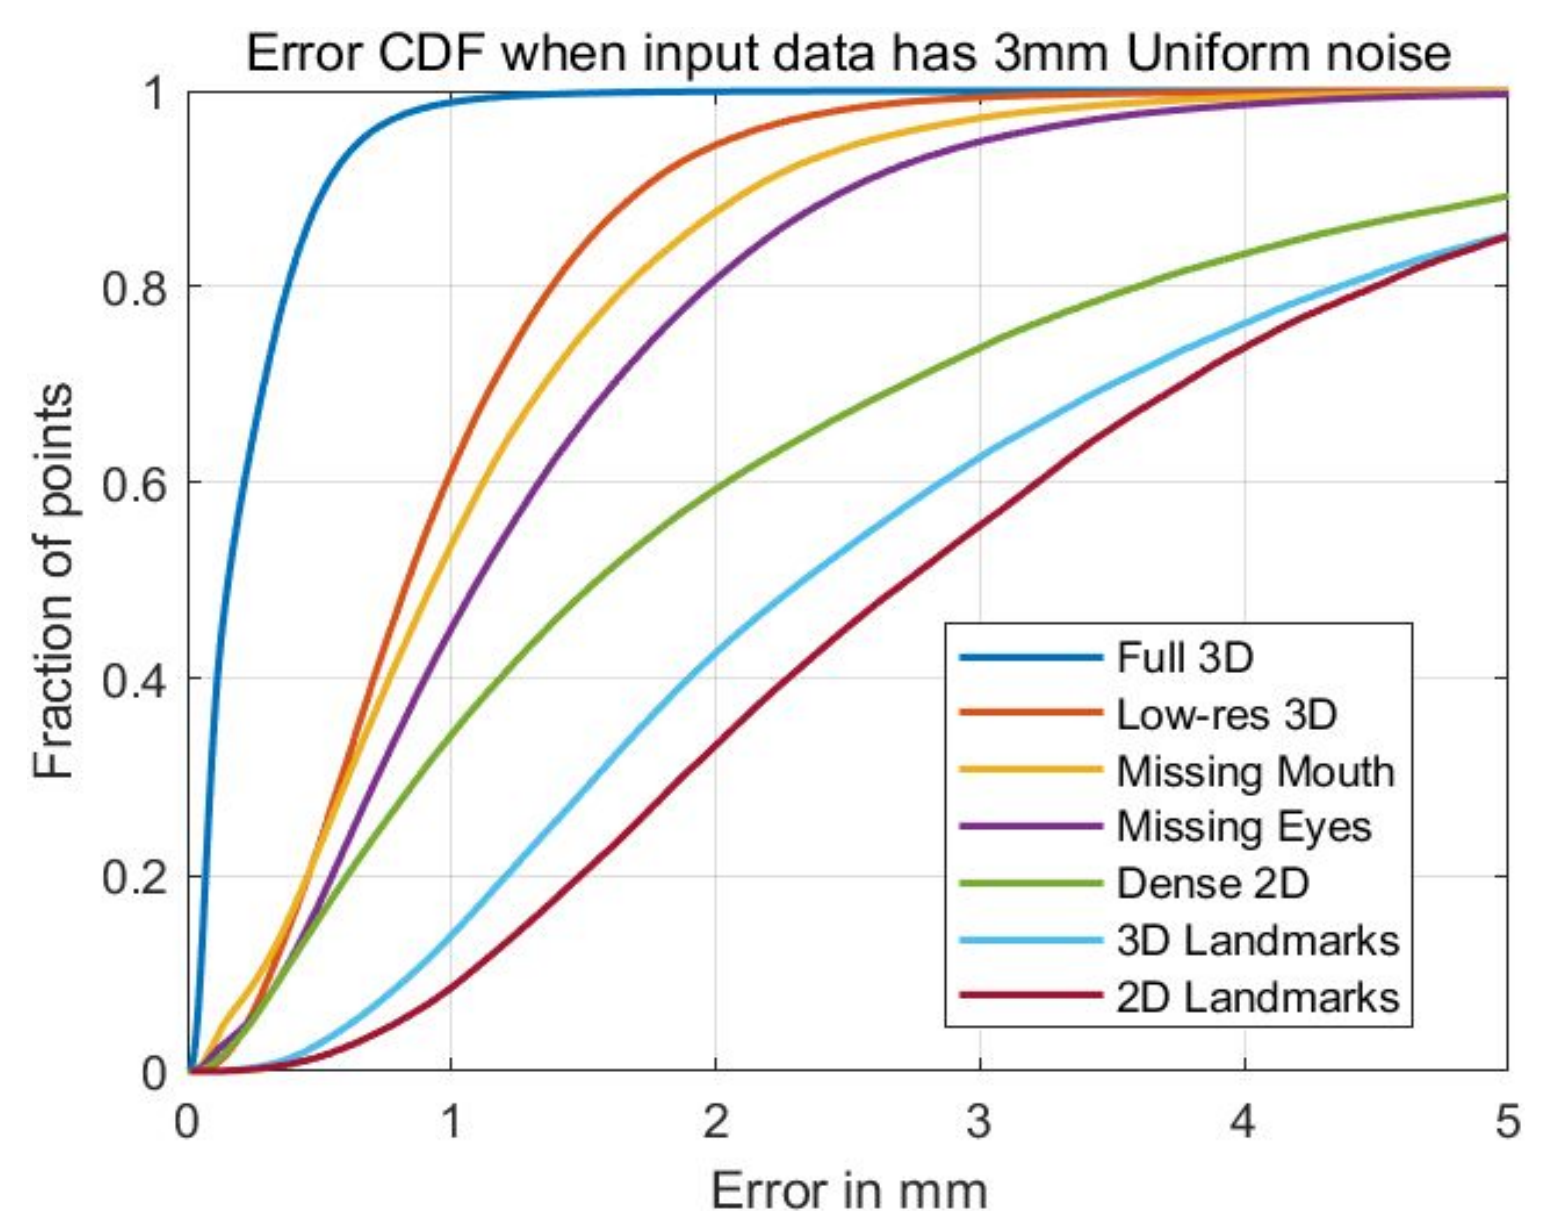

Cumulative error distribution when input has different kinds of noise added, showing the fraction of reconstructed vertices with less than a given threshold error. The overall relationship between data types is the same as in the no noise analysis.
